# Supplementary material
Source: PubMed Central journal article supplement (PMC2820158)

# Proximity Effects in Nucleophilic Addition Reactions to Medium-Bridged Twisted Lactams: Remarkably Stable Tetrahedral Intermediates

Michal Szostak, Lei Yao and Jeffrey Aubé\*

*Department of Medicinal Chemistry, 1251 Wescoe Hall Drive, Malott Hall, Room 4070, University of Kansas, Lawrence, Kansas 66045-7582*

*jaube@ku.edu*

## Supporting Information

|                                                                                               |    |
|-----------------------------------------------------------------------------------------------|----|
| Table of Contents                                                                             | 1  |
| List of Known Compounds                                                                       | 2  |
| Additions to Bridged Lactams                                                                  | 2  |
| • Hydride Addition to Bridged Amides                                                          | 2  |
| • Role of Hydride Source and Reaction Conditions on Formation and Fates of Stable Hemiaminals | 8  |
| • Synthetic Transformations of Bridged Hemiaminals                                            | 11 |
| • Organometallic Addition to Bicyclic and Tricyclic Amides                                    | 14 |
| Organometallic Addition to Planar Analogues of Bridged Amides                                 | 19 |
| Observation of N $\cdots$ C=O Interactions                                                    | 21 |
| Additional Discussion Regarding IR Spectra                                                    | 23 |
| Reactions with Additional Nucleophiles                                                        | 26 |
| References                                                                                    | 30 |
| <sup>1</sup> H and <sup>13</sup> C NMR Spectra of New Compounds                               | 31 |
| IR Spectra of Compounds <b>2a</b> , <b>8a</b> , <b>8c-d</b> , <b>9a-10c</b>                   | 71 |

### Corresponding Author:

Professor Jeffrey Aubé\*  
Department of Medicinal Chemistry  
1251 Wescoe Hall Drive  
Malott Hall, Room 4070  
University of Kansas  
Lawrence, Kansas 66045-7582

Tel: 1.785.864.4496  
Fax: 1.785.864.5326  
E-mail: jaube@ku.edu

## List of Known Compounds

The following compounds are known: bridged lactams **1a**, **1b**, **1g**, **1m**,<sup>1</sup> **1e**, **1f**, **1l**,<sup>2</sup> **1h**, **1i**, **1j**.<sup>3</sup> Lactams **1c**, **1d** and **1k** were prepared in a manner analogous to **1a** and **1b**. Full details will be reported separately.<sup>4</sup> Fused lactams **11**<sup>1</sup> and **13**.<sup>2</sup>

## Hydride Addition to Bridged Amides

**General procedure:** To a solution of bridged amide (1.0 equiv) in EtOH, NaBH<sub>4</sub> (3.0 equiv) was added at rt, and the reaction mixture was stirred at rt for 20-24 h. The reaction was quenched with sat. NH<sub>4</sub>Cl (5 mL), extracted with CH<sub>2</sub>Cl<sub>2</sub> (3 x 50 mL), washed with brine (1 x 10 ml), dried and concentrated. Chromatography (MeOH/CH<sub>2</sub>Cl<sub>2</sub>) afforded the final products.

**Scheme A.** Synthesis of Compounds **2a-4l** (Table 1 and Scheme 1).

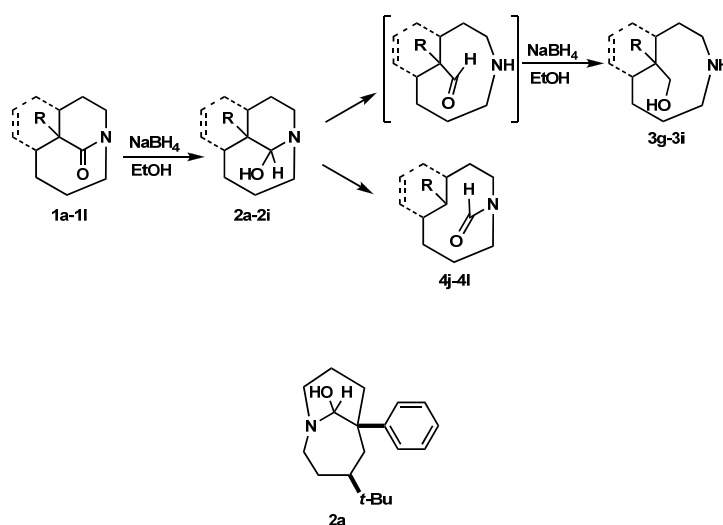

**(4R,6R)-4-tert-Butyl-6-phenyl-1-azabicyclo[4.3.1]decan-10-ol (2a).** According to the general procedure, the reaction of amide **1a** (0.0250 g, 0.088 mmol, 1.0 equiv) and NaBH<sub>4</sub> (0.010 g, 0.26 mmol, 3.0 equiv) in EtOH (5.0 mL) for 21 h at rt afforded after chromatography (1/10/90 NH<sub>4</sub>OH/MeOH/CH<sub>2</sub>Cl<sub>2</sub>) the title compound as oil (R<sub>f</sub> = 0.43, 1/10/90 NH<sub>4</sub>OH/MeOH/CH<sub>2</sub>Cl<sub>2</sub>). Yield 90% (0.02228 g, 0.079 mmol), 80:20 mixture of inseparable diastereoisomers. <sup>1</sup>H NMR (400 MHz, CDCl<sub>3</sub>) (major isomer) δ 0.87 (s, 9H), 1.38-1.61 (m, 3H), 1.73-1.92 (m, 3H), 1.99-2.21 (m, 2H), 2.43-2.53 (m, 2H), 2.65 (dt, *J* = 5.0, 13.4 Hz, 1H), 3.48 (dt, *J* = 3.9, 13.5 Hz, 1H), 3.63-3.70 (m, 1H), 5.13 (s, 1H), 7.16-7.42 (m, 5H); (minor isomer, diagnostic peaks) δ 0.95 (s, 9H), 2.93 (d, *J* = 7.9 Hz, 1H), 4.95 (s, 1H); <sup>13</sup>C NMR (100 MHz, CDCl<sub>3</sub>) (major isomer) δ 21.3, 27.5, 29.9, 30.8, 33.8, 42.8, 45.2, 47.1, 47.5, 53.1, 83.5, 125.4, 125.5, 128.2, 150.6; (minor isomer, diagnostic peaks) δ 21.4, 27.8, 29.4, 34.0, 38.0, 38.1, 43.4, 46.2, 50.2, 51.9, 88.3, 126.0, 128.0,

151.2; IR (neat) 3400, 2057, 2957, 2941, 2866, 1468, 1445, 1366, 733, 696  $\text{cm}^{-1}$ ; HRMS calcd for  $\text{C}_{19}\text{H}_{30}\text{NO}$  ( $\text{M}^+ + \text{H}$ ) 288.2327, found 288.2330.

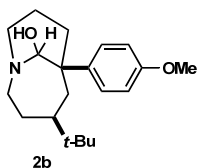

**(4R,6R)-4-tert-Butyl-6-(4-methoxyphenyl)-1-azabicyclo[4.3.1]decan-10-ol**

**(2b).** According to the general procedure, the reaction of amide **1b** (0.0335 g, 0.11 mmol, 1.0 equiv) and  $\text{NaBH}_4$  (0.0121 g, 0.32 mmol, 3.0 equiv) in EtOH (5.0 mL) for 20 h at rt afforded after chromatography (1/10/90  $\text{NH}_4\text{OH}/\text{MeOH}/\text{CH}_2\text{Cl}_2$ ) the title compound as oil ( $R_f = 0.40$ , 1/10/90  $\text{NH}_4\text{OH}/\text{MeOH}/\text{CH}_2\text{Cl}_2$ ). Yield 91% (0.0318 g, 0.10 mmol), 77:23 mixture of inseparable diastereoisomers.  $^1\text{H}$  NMR (400 MHz,  $\text{CDCl}_3$ ) (major isomer)  $\delta$  0.86 (s, 9H), 1.38-1.58 (m, 3H), 1.73-1.95 (m, 3H), 1.98-2.21 (m, 2H), 2.37-2.53 (m, 2H), 2.64 (dt,  $J = 5.0, 12.8$  Hz, 1H), 3.47 (dt,  $J = 4.1, 13.8$  Hz, 1H), 3.62-3.73 (m, 1H), 3.81 (s, 3H), 5.08 s, 1H), 6.88 (d,  $J = 8.9$  Hz, 2H), 7.30 (d,  $J = 8.9$  Hz, 2H); (minor isomer, diagnostic peaks)  $\delta$  0.94 (s, 9H), 2.93 (d,  $J = 7.1$  Hz, 1H), 4.91 (s, 1H), 7.52 (d,  $J = 8.9$  Hz, 2H);  $^{13}\text{C}$  NMR (100 MHz,  $\text{CDCl}_3$ ) (major isomer)  $\delta$  21.2, 27.5, 30.0, 30.7, 33.8, 42.2, 45.1, 47.2, 47.5, 53.1, 55.2, 83.5, 113.3, 126.4, 142.7, 157.2; (minor isomer, diagnostic peaks)  $\delta$  27.8, 34.0, 38.1, 38.3, 42.8, 46.2, 50.4, 51.9, 88.6, 113.3, 127.1, 142.7; IR (neat) 3440, 2955, 2988, 1610, 1512, 1250, 1186, 825, 731  $\text{cm}^{-1}$ ; HRMS calcd for  $\text{C}_{20}\text{H}_{32}\text{NO}_2$  ( $\text{M}^+ + \text{H}$ ) 318.2433, found 318.2429.

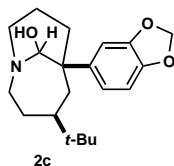

**(4R,6R)-6-(Benzo[d][1,3]dioxol-5-yl)-4-tert-butyl-1-azabicyclo[4.3.1]decan-10-ol (2c).**

According to the general procedure, the reaction of amide **1c** (0.0335 g, 0.10 mmol, 1.0 equiv) and  $\text{NaBH}_4$  (0.0116 g, 0.30 mmol, 3.0 equiv) in EtOH (5.0 mL) for 18 h at rt afforded after chromatography (1/10/90  $\text{NH}_4\text{OH}/\text{MeOH}/\text{CH}_2\text{Cl}_2$ ) the title compound as oil ( $R_f = 0.79$ , 1/10/90  $\text{NH}_4\text{OH}/\text{MeOH}/\text{CH}_2\text{Cl}_2$ ). Yield 94% (0.0313 g, 0.094 mmol), 78:22 mixture of inseparable diastereoisomers.  $^1\text{H}$  NMR (400 MHz,  $\text{CDCl}_3$ ) (major isomer)  $\delta$  0.86 (s, 9H), 1.37-1.50 (m, 2H), 1.51-1.59 (m, 1H), 1.71-1.81 (m, 2H), 1.86 (d,  $J = 11.8$  Hz, 1H), 1.93-2.22 (m, 2H), 2.38 (dt,  $J = 6.5, 12.6$  Hz, 1H), 2.49 (dd,  $J = 4.8, 14.1$  Hz, 1H), 2.64 (dt,  $J = 4.9, 13.2$  Hz, 1H), 3.46 (dt,  $J = 4.0, 13.7$  Hz, 1H), 3.61-3.69 (m, 1H), 5.03 (s, 1H), 5.94 (s, 2H), 6.73-6.84 (m, 2H), 6.90 (s, 1H); (minor isomer, diagnostic peaks)  $\delta$  0.94 (s, 9H), 2.92 (d,  $J = 7.5$  Hz, 1H), 4.86 (s, 1H), 5.93 (s, 2H), 7.06 (d,  $J = 8.3$  Hz, 1H);  $^{13}\text{C}$  NMR (100 MHz,  $\text{CDCl}_3$ ) (major isomer)  $\delta$  21.2, 27.5, 30.3, 30.7, 33.8, 42.7, 45.0, 47.2, 47.4, 53.0, 83.5, 100.8, 106.4, 107.9, 118.2, 144.9, 145.1, 147.5; (minor isomer, diagnostic peaks)  $\delta$  21.3, 27.8, 30.4, 38.2, 38.5, 43.4,

46.1, 50.3, 51.8, 88.5, 100.7, 107.3, 107.6, 118.9, 144.9, 145.4, 147.2; IR (neat) 3400, 2959, 2941, 2868, 1504, 1489, 1234, 1042, 912, 733  $\text{cm}^{-1}$ ; HRMS calcd for  $\text{C}_{20}\text{H}_{30}\text{NO}_3$  ( $\text{M}^+ + \text{H}$ ) 332.2226, found 332.2225.

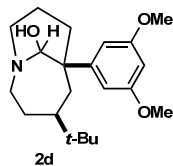

**(4R,6R)-4-tert-Butyl-6-(3,5-dimethoxyphenyl)-1-azabicyclo[4.3.1]decan-10-ol**

**(2d).** According to the general procedure, the reaction of amide **1d** (0.0571 g, 0.17 mmol, 1.0 equiv) and  $\text{NaBH}_4$  (0.0188 g, 0.50 mmol, 3.0 equiv) in EtOH (5.0 mL) for 18 h at rt afforded after chromatography (1/10/90  $\text{NH}_4\text{OH}/\text{MeOH}/\text{CH}_2\text{Cl}_2$ ) the title compound as oil ( $R_f = 0.53$ , 1/10/90  $\text{NH}_4\text{OH}/\text{MeOH}/\text{CH}_2\text{Cl}_2$ ). Yield 95% (0.0561 g, 0.16 mmol), 77:23 mixture of inseparable diastereoisomers.  $^1\text{H}$  NMR (400 MHz,  $\text{CDCl}_3$ ) (major isomer)  $\delta$  0.86 (s, 9H), 1.38-1.60 (m, 3H), 1.71-1.91 (m, 3H), 1.93-2.22 (m, 2H), 2.36-2.52 (m, 2H), 2.64 (dt,  $J = 5.0, 12.6$  Hz, 1H), 3.48 (dt,  $J = 4.1, 13.8$  Hz, 1H), 3.59-3.69 (m, 1H), 3.82 (s, 9H), 5.05 (s, 1H), 6.32 (t,  $J = 2.0$  Hz, 1H), 6.54 (d,  $J = 2.2$  Hz, 2H); (minor isomer, diagnostic peaks)  $\delta$  0.94 (s, 9H), 1.66 (m, 2H), 2.92 (d,  $J = 7.2$  Hz, 2H), 4.90 (s, 1H), 6.81 (d,  $J = 2.2$  Hz, 2H);  $^{13}\text{C}$  NMR (100 MHz,  $\text{CDCl}_3$ ) (major isomer)  $\delta$  21.3, 27.5, 30.0, 30.7, 33.8, 43.0, 45.0, 46.7, 47.4, 52.9, 55.2, 83.5, 96.8, 104.5, 153.3, 160.5; (minor isomer, diagnostic peaks)  $\delta$  21.3, 27.8, 29.2, 34.0, 38.0, 43.7, 46.1, 50.3, 51.8, 55.2, 88.2, 97.0, 105.1, 153.9, 160.3; IR (neat) 3400, 3088, 2955, 2868, 1595, 1456, 1308, 1204, 1151, 1069, 910, 733  $\text{cm}^{-1}$ ; HRMS calcd for  $\text{C}_{21}\text{H}_{34}\text{NO}_3$  ( $\text{M}^+ + \text{H}$ ) 348.2539, found 348.2538.

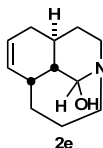

**Hemiactal 2e.** According to the general procedure, amide **1e** (0.060 g, 0.31 mmol, 1.0 equiv) was reacted with  $\text{NaBH}_4$  (0.036 g, 0.94 mmol, 3.0 equiv) in EtOH for 18 h at rt. Saturated  $\text{NH}_4\text{Cl}$  (ca. 1 mL) was added and after stirring for 5 min, the solution was dried with  $\text{Na}_2\text{SO}_4$ , filtered, and concentrated. Chromatography (1/9 MeOH/ $\text{CH}_2\text{Cl}_2$ ) afforded the title compound as oil. Yield 91% (0.0550 g, 0.29 mmol).  $^1\text{H}$  NMR (400 MHz,  $\text{CDCl}_3$ )  $\delta$  1.21-1.25 (m, 1H), 1.82-2.16 (complex, 11H), 2.30-2.40 (m, 1H), 2.90-2.98 (m, 2H), 3.91-3.95 (m, 1H), 4.05-4.10 (m, 1H), 5.37 (s, 1H), 5.60-5.74 (m, 2H);  $^{13}\text{C}$  NMR (100 MHz,  $\text{CDCl}_3$ )  $\delta$  22.8, 23.5, 27.6, 32.9, 34.0, 36.6, 46.6, 49.9, 56.5, 82.0, 126.5, 132.3; IR (neat): 3370  $\text{cm}^{-1}$ ; HRMS calcd for  $\text{C}_{12}\text{H}_{20}\text{NO}$  ( $\text{M}^+ + 1$ ) 194.1545, found 194.1530.

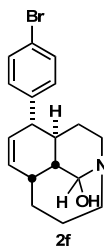

**Hemiaminal 2f.** According to the general procedure, the reaction of amide **1f** (0.100 g, 0.29 mmol, 1.0 equiv) and NaBH<sub>4</sub> (0.033 g, 0.87 mmol, 3.0 equiv) in EtOH for 18 h at rt afforded after chromatography (1/9 MeOH/CH<sub>2</sub>Cl<sub>2</sub>) the title compound as oil. Yield 88% (0.0892 g, 0.26 mmol). <sup>1</sup>H NMR (400 MHz, CDCl<sub>3</sub>) δ 1.58-1.90 (complex, 4H), 2.00-2.12 (m, 2H), 2.27-2.30 (m, 2H), 2.54-2.56 (m, 1H), 2.75-2.85 (m, 2H), 3.20-3.23 (m, 1H), 3.87-3.93 (m, 1H), 4.01-4.06 (m, 1H), 5.43 (s, 1H), 5.57-5.59 (m, 1H), 5.96-6.00 (m, 1H), 7.01-7.03 (m, 2H), 7.45-7.47 (m, 2H); <sup>13</sup>C NMR (100 MHz, CDCl<sub>3</sub>) δ 20.2, 23.4, 33.2, 35.7, 36.5, 46.3, 50.0, 50.7, 56.4, 82.0, 120.9, 129.7, 130.4, 131.8, 133.4, 141.1; IR (neat): 3370 cm<sup>-1</sup>; HRMS calcd for C<sub>18</sub>H<sub>23</sub>BrNO (M<sup>+</sup>+1) 348.0963, found 348.0964.

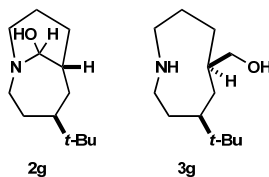

**(4R,6R)-4-tert-Butyl-1-azabicyclo[4.3.1]decan-10-ol (2g) and ((7R)-7-tert-Butylazonan-5-yl)methanol (3g).** According to the general procedure, the reaction of amide **1g** (0.100 g, 0.47 mmol, 1.0 equiv) and NaBH<sub>4</sub> (0.0545 g, 1.44 mmol, 3.0 equiv) in EtOH (20 mL) for 18 h at rt afforded after chromatography (1/20/80 NH<sub>4</sub>OH/MeOH/CH<sub>2</sub>Cl<sub>2</sub>) **2g** as oil (R<sub>f</sub> = 0.52, 1/10/90 NH<sub>4</sub>OH/MeOH/CH<sub>2</sub>Cl<sub>2</sub>), yield 24% (0.0240 g, 0.11 mmol), 80:20 mixture of inseparable diastereoisomers, and **3g** as oil (R<sub>f</sub> = 0.24, 1/10/90 NH<sub>4</sub>OH/MeOH/CH<sub>2</sub>Cl<sub>2</sub>), yield 52% (0.0522 g, 0.25 mmol). Analysis of the crude reaction mixture by <sup>1</sup>H NMR indicated 30:70 mixture of **2g** to **3g**. Compound **2g**: <sup>1</sup>H NMR (400 MHz, CDCl<sub>3</sub>) (major isomer) δ 0.89 (s, 9H), 0.99 (td, *J* = 3.5, 14.0 Hz, 1H), 1.21-1.55 (m, 4H), 1.70-1.88 (m, 2H), 2.05-2.16 (m, 1H), 2.16-2.24 (m, 2H), 2.57 (dd, *J* = 4.7, 14.4 Hz, 1H), 2.85 (td, *J* = 2.8, 14.7 Hz, 1H), 3.03 (dt, *J* = 3.4, 14.5 Hz, 1H), 3.44 (td, *J* = 4.0, 13.8 Hz, 1H), 4.66 (s, 1H); (minor isomer, diagnostic peaks) δ 0.90 (s, 9H), 2.38-2.46 (m, 2H), 2.48-2.54 (m, 1H), 4.72 (s, 1H); <sup>13</sup>C NMR (100 MHz, CDCl<sub>3</sub>) (major isomer) δ 19.4, 24.3, 27.6, 30.5, 31.9, 33.7, 33.9, 44.7, 45.8, 54.8, 81.4; (minor isomer, diagnostic peaks) δ 19.3, 24.8, 27.6, 29.8, 33.5, 34.7, 35.3, 45.3, 48.1, 51.4, 81.2; IR (neat) 3400, 3125, 2937, 1468, 1450, 1366, 1053, 986 cm<sup>-1</sup>; HRMS calcd for C<sub>13</sub>H<sub>26</sub>NO (M<sup>+</sup> + H) 212.2014, found 212.2009. Compound **3g**: <sup>1</sup>H NMR (400 MHz, CDCl<sub>3</sub>) δ 0.88 (s, 9H), 1.18-1.80 (m, 9H), 1.81-1.92 (m, 1H), 2.03 (br, 2H), 2.53 (td, *J* = 3.9, 13.1 Hz, 1H), 2.64-2.78 (m, 2H), 2.82-2.92 (m, 1H), 3.38-3.53 (m, 2H); <sup>13</sup>C NMR (100 MHz, CDCl<sub>3</sub>) δ 24.3, 26.7, 27.7, 28.5, 32.9, 34.2, 34.8, 40.6, 42.9, 49.5, 67.5;

IR (neat) 3350, 2939, 2866, 1477, 1364, 1140, 1030  $\text{cm}^{-1}$ ; HRMS calcd for  $\text{C}_{13}\text{H}_{28}\text{NO}$  ( $\text{M}^+ + \text{H}$ ) 214.2171, found 214.2170.

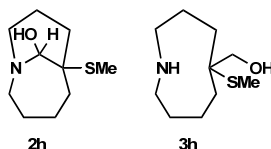

**6-(Methylthio)-1-azabicyclo[4.3.1]decan-10-ol (2h) and (5-(Methylthio)azonan-5-yl)methanol (3h).** According to the general procedure, the reaction of amide **1h** (0.0322 g, 0.16 mmol, 1.0 equiv) and  $\text{NaBH}_4$  (0.018 g, 0.48 mmol, 3.0 equiv) in EtOH (10 mL) for 18 h at rt afforded after chromatography (1/10/90  $\text{NH}_4\text{OH}/\text{MeOH}/\text{CH}_2\text{Cl}_2$ ) **2h** as oil ( $R_f = 0.65$ , 1/10/90  $\text{NH}_4\text{OH}/\text{MeOH}/\text{CH}_2\text{Cl}_2$ ), yield 40% (0.0129 g, 0.064 mmol), and **3h** as oil ( $R_f = 0.17$ , 1/10/90  $\text{NH}_4\text{OH}/\text{MeOH}/\text{CH}_2\text{Cl}_2$ ), yield 48% (0.0161 g, 0.079 mmol). Compound **2h**:  $^1\text{H}$  NMR (400 MHz,  $\text{CDCl}_3$ )  $\delta$  1.43-1.73 (m, 5H), 1.74-2.05 (m, 5H), 2.12 (s, 3H), 2.34-2.42 (m, 1H), 2.58 (dd,  $J = 4.8, 14.2$  Hz, 1H), 2.94-3.08 (m, 2H), 3.34-3.45 (m, 1H), 4.61 (s, 1H);  $^{13}\text{C}$  NMR (100 MHz,  $\text{CDCl}_3$ )  $\delta$  10.1, 22.6, 25.9, 31.7, 32.0, 38.6, 43.7, 50.9, 55.1, 80.9; IR (neat) 2400, 2920, 2856, 1450, 1163, 1155, 1113  $\text{cm}^{-1}$ ; HRMS calcd for  $\text{C}_{10}\text{H}_{20}\text{NOS}$  ( $\text{M}^+ + \text{H}$ ) 202.1266, found 202.1263. Compound **3h**:  $^1\text{H}$  NMR (400 MHz,  $\text{CDCl}_3$ )  $\delta$  1.44-1.55 (m, 4H), 1.58-1.78 (m, 5H), 1.78-1.95 (m, 3H), 1.91 (s, 3H), 2.07-2.85 (m, 4H), 3.33 (q,  $J = 11.5$  Hz, 2H);  $^{13}\text{C}$  NMR (100 MHz,  $\text{CDCl}_3$ )  $\delta$  9.5, 17.5, 20.5, 25.6, 26.1, 28.4, 41.9, 47.7, 56.7, 63.6; IR (neat) 3400, 2920, 2862, 1480, 1157, 1123, 748  $\text{cm}^{-1}$ ; HRMS calcd for  $\text{C}_{10}\text{H}_{22}\text{NOS}$  ( $\text{M}^+ + \text{H}$ ) 204.1422, found 204.1420.

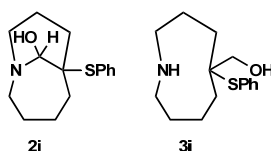

**6-(Phenylthio)-1-azabicyclo[4.3.1]decan-10-ol (2i) and (5-(Phenylthio)azonan-5-yl)methanol (3i).** According to the general procedure, the reaction of amide **1i** (0.0245 g, 0.093 mmol, 1.0 equiv) and  $\text{NaBH}_4$  (0.011 g, 0.28 mmol, 3.0 equiv) in EtOH (5 mL) for 18 h at rt afforded after chromatography (1/5/95  $\text{NH}_4\text{OH}/\text{MeOH}/\text{CH}_2\text{Cl}_2$ ) **2i** as oil ( $R_f = 0.50$ , 1/10/90  $\text{NH}_4\text{OH}/\text{MeOH}/\text{CH}_2\text{Cl}_2$ ), yield 62% (0.0151 g, 0.057 mmol), 83:17 mixture of diastereoisomers, and **3i** as oil ( $R_f = 0.31$ , 1/10/90  $\text{NH}_4\text{OH}/\text{MeOH}/\text{CH}_2\text{Cl}_2$ ), yield 34% (0.0083 g, 0.031 mmol). Analysis of the crude reaction mixture by  $^1\text{H}$  NMR indicated 63:37 mixture of **2i** to **3i**. Compound **2i**:  $^1\text{H}$  NMR (400 MHz,  $\text{CDCl}_3$ ) (major isomer)  $\delta$  1.02-1.16 (m, 1H), 1.48-1.65 (m, 5H), 1.78-1.91 (m, 3H), 2.18 (td,  $J = 4.6, 12.4$  Hz, 1H), 2.34 (ddd,  $J = 3.4, 6.2, 15.8$  Hz, 1H), 2.55 (dd,  $J = 4.9, 14.1$  Hz, 1H), 2.86-2.99 (m, 2H), 3.44 (td,  $J = 3.5, 13.7$  Hz, 1H), 4.50 (s, 1H), 7.30-7.42 (m, 3H), 7.60 (dd,  $J = 1.8, 7.9$  Hz, 2H); (minor isomer, diagnostic peaks)  $\delta$  2.68-2.75 (m, 1H), 4.30 (s, 1H);  $^{13}\text{C}$  NMR (100 MHz,  $\text{CDCl}_3$ ) (major isomer)  $\delta$  22.9, 24.8, 31.2, 32.4, 38.1, 43.5, 54.5, 55.8, 81.9, 128.8, 129.0, 130.9, 136.7; IR (neat) 3450, 3071, 3057, 2924, 2855, 1450, 1437,

1350, 1150, 750  $\text{cm}^{-1}$ ; HRMS calcd for  $\text{C}_{15}\text{H}_{22}\text{NOS}$  ( $\text{M}^+ + \text{H}$ ) 264.1422, found 264.1422. Compound **3i**:  $^1\text{H}$  NMR (400 MHz,  $\text{CDCl}_3$ )  $\delta$  1.39-1.65 (m, 6H), 1.65-2.16 (m, 6H), 2.63-2.71 (m, 1H), 2.73-2.87 (m, 3H), 3.24 (q,  $J = 11.6$  Hz, 2H), 7.33-7.43 (m, 3H), 7.51 (dd,  $J = 1.4, 6.7$  Hz, 2H);  $^{13}\text{C}$  NMR (100 MHz,  $\text{CDCl}_3$ )  $\delta$  17.5, 20.7, 25.9, 26.3, 28.5, 41.5, 47.6, 62.3, 64.3, 128.9, 129.1, 130.0, 137.3; IR (neat) 3400, 3057, 2918, 2849, 1474, 1437, 1410, 1050, 750  $\text{cm}^{-1}$ ; HRMS calcd for  $\text{C}_{15}\text{H}_{24}\text{NOS}$  ( $\text{M}^+ + \text{H}$ ) 266.1579, found 266.1577.

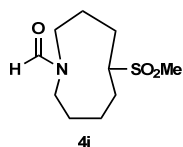

**5-(Methylsulfonyl)azonane-1-carbaldehyde (4j).** According to the general procedure, the reaction of amide **1j** (0.0110 g, 0.048 mmol, 1.0 equiv) and  $\text{NaBH}_4$  (0.0054 g, 0.14 mmol, 3.0 equiv) in EtOH (4 mL) for 18 h at rt afforded after chromatography (1/10/90  $\text{NH}_4\text{OH}/\text{MeOH}/\text{CH}_2\text{Cl}_2$ ) **4j** as oil ( $R_f = 0.35$ , 1/10/90  $\text{NH}_4\text{OH}/\text{MeOH}/\text{CH}_2\text{Cl}_2$ ). Yield 98% (0.0110 g, 0.047 mmol).  $^1\text{H}$  NMR (400 MHz,  $\text{CDCl}_3$ ) (60:40 mixture of rotamers)  $\delta$  1.61-1.99 (m, 7H), 2.06-2.37 (m, 3H), 2.84 (s, 3H, minor rotamer), 2.85 (s, 3H, major rotamer), 2.89-3.02 (m, 1H), 3.08-3.37 (m, 2H), 3.42-3.56 (m, 1H), 3.68-3.77 (m, 1H), 8.15 (s, 1H, major rotamer), 8.20 (s, 1H, minor rotamer);  $^{13}\text{C}$  NMR (100 MHz,  $\text{CDCl}_3$ ) (mixture of rotamers)  $\delta$  23.5, 23.8, 24.3, 24.4, 25.3, 25.4, 25.6, 26.0, 26.6, 26.8, 37.7, 37.9, 45.1, 45.7, 49.6, 50.4, 62.1, 62.2, 163.9, 164.3; IR (neat) 1651, 1283, 1128  $\text{cm}^{-1}$ ; HRMS calcd for  $\text{C}_{10}\text{H}_{20}\text{NO}_3\text{S}$  ( $\text{M}^+ + \text{H}$ ) 234.1164, found 234.1167.

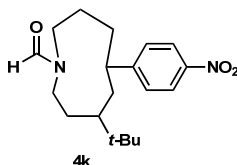

**4-tert-Butyl-6-(4-nitrophenyl)azonane-1-carbaldehyde (4k).** According to the general procedure, the reaction of amide **1k** (0.0221 g, 0.067 mmol, 1.0 equiv) and  $\text{NaBH}_4$  (0.008 g, 0.20 mmol, 3.0 equiv) in EtOH (10 mL) for 20 h at rt afforded **4k** as 42:68 mixture of diastereoisomers (determined by  $^1\text{H}$  NMR of the crude reaction mixture). PTLC (1/10/90  $\text{NH}_4\text{OH}/\text{MeOH}/\text{CH}_2\text{Cl}_2$ ) afforded minor diastereoisomer **4ka** as oil ( $R_f = 0.54$ , 1/10/90  $\text{NH}_4\text{OH}/\text{MeOH}/\text{CH}_2\text{Cl}_2$ ), yield 36% (0.0081 g, 0.024 mmol), and major diastereoisomer **4kb** as oil ( $R_f = 0.46$ , 1/10/90  $\text{NH}_4\text{OH}/\text{MeOH}/\text{CH}_2\text{Cl}_2$ ), yield 46% (0.0103 g, 0.031 mmol). Compound **4ka**:  $^1\text{H}$  NMR (400 MHz,  $\text{CDCl}_3$ ) (64:36 mixture of rotamers)  $\delta$  0.91 (s, 9H, major rotamer), 0.94 (s, 9H, minor rotamer), 1.58-2.8 (m, 10H), 3.21-3.69 (m, 4H), 7.62-7.68 (m, 2H), 8.16-8.22 (m, 2H), 8.32 (s, 1H, minor rotamer);  $^{13}\text{C}$  NMR (100 MHz,  $\text{CDCl}_3$ ) (mixture of rotamers)  $\delta$  21.8, 21.9, 27.6, 30.2, 33.4, 34.6, 34.7, 36.8, 37.7, 39.1, 40.8, 42.5, 44.1, 45.8, 48.9, 50.1, 75.6, 76.2, 123.6, 123.6, 125.5, 125.7, 146.8, 157.6, 164.0, 164.1; IR (neat) 2959, 2870, 1661, 1518, 1348, 733  $\text{cm}^{-1}$ ;

HRMS calcd for  $C_{19}H_{29}N_2O_3$  ( $M^+ + H$ ) 333.2178, found 333.2159. Compound **4kb**:  $^1H$  NMR (400 MHz,  $CDCl_3$ ) (55:45 mixture of rotamers)  $\delta$  0.45 (s, 9H, minor rotamer), 0.55 (s, 9H, major rotamer), 0.96-1.02 (m, 1H), 1.48-2.44 (m, 9H), 3.26-3.43 (m, 2H), 3.46-3.58 (m, 1H), 3.61-3.71 (m, 1H, minor rotamer), 3.83 (td,  $J = 4.3, 13.8$  Hz, 1H, major rotamer), 7.66-7.73 (m, 2H), 8.16-8.20 (m, 2H), 8.22 (s, 1H, minor rotamer), 8.29 (s, 1H, major rotamer);  $^{13}C$  NMR (100 MHz,  $CDCl_3$ ) (mixture of rotamers)  $\delta$  20.2, 20.8, 27.3, 27.5, 29.7, 31.2, 32.0, 33.2, 34.1, 34.3, 39.4, 39.6, 40.9, 42.6, 42.9, 43.7, 47.7, 48.8, 123.3, 126.7, 127.0, 146.9, 155.9, 156.0, 163.9, 164.5; IR (neat) 2961, 2872, 1659, 1518, 1349, 1076, 912, 856, 733  $cm^{-1}$ ; HRMS calcd for  $C_{19}H_{28}N_2O_3Na$  ( $M^+ + Na$ ) 355.1997, found 355.2019.

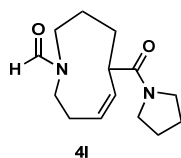

**(Z)-5-(Pyrrolidine-1-carbonyl)-2,3,4,5,8,9-hexahydro-1H-azonine-1-carbaldehyde (4I)**. According to the general procedure, the reaction of amide **11** (0.080 g, 0.32 mmol, 1.0 equiv) and  $NaBH_4$  (0.037 g, 0.97 mmol, 3.0 equiv) in EtOH for 18 h at rt afforded after chromatography (20% EtOH/EtOAc) **4I** as oil in 99% yield (0.0801 g, 0.32 mmol).  $^1H$  NMR (400 MHz,  $CDCl_3$ ) (88:12 mixture of rotamers)  $\delta$  1.50-1.54 (m, 2H), 1.73-2.00 (complex, 5H), 2.00-2.10 (m, 1H), 2.53-2.55 (m, 1H), 2.64-2.70 (m, 1H), 3.14 (m, 1H), 3.28-3.41 (complex, 6H), 3.91-3.96 (m, 1H), 5.38-5.44 (m, 1H), 5.87-5.93 (m, 1H), 8.09 (s, 1H);  $^{13}C$  NMR (100 MHz,  $CDCl_3$ ) (mixture of rotamers)  $\delta$  22.9, 23.0, 24.2, 26.1, 28.3, 42.7, 45.8, 45.9, 46.0, 50.6, 129.9, 130.0, 162.9, 171.8; IR (neat): 3370, 1655, 1630  $cm^{-1}$ ; HRMS calcd for  $C_{14}H_{23}N_2O_2$  ( $M^+ + 1$ ) 251.1760, found 251.1747.

### Role of Hydride Source and Reaction Conditions on Formation and Fates of Stable Hemiaminals

Reaction of **1a** with a number of different hydride sources<sup>5</sup> afforded stable hemiaminal **2a** (Table A). Interestingly, the reduction rate with  $NaBH_4$ <sup>6</sup> was found to be qualitatively slower in methanol as a solvent than in ethanol (entry 2), which contrasts with the reduction of typical carbonyl groups by  $NaBH_4$ .<sup>7</sup> In addition, the reduction of **1a** was suppressed when  $CeCl_3$  was utilized as an additive (entry 3).<sup>8</sup> Hydrogen bonding or coordination to the amide bond nitrogen could be responsible for decreased reaction rates in these cases.

Tributoxyaluminum hydride<sup>9</sup> and L-Selectride<sup>10</sup> (entries 5 and 6) did not reduce **34**, while  $LiAlH_4$ ,<sup>11</sup> Red-Al and DIBAL-H<sup>12</sup> smoothly provided hemiaminal **238** (entries 7-9). In contrast,  $LiEt_3BH$ <sup>13</sup> promoted the collapse of **238** to the aldehyde (entry 11), indicating that the outcome of the reduction of one-carbon bridged lactams could also be modified by changes in reaction conditions (vs. substrate modification).



Importantly, when a one-carbon higher homologue of **1a** ([5.3.1] ring system) was treated with NaBH<sub>4</sub>, reduction was not observed, indicating that the [5.3.1] scaffold is not sufficiently distorted to permit hydride addition under these conditions (Scheme B).<sup>6</sup>

**Table A.** Reduction of Lactam **1a**.

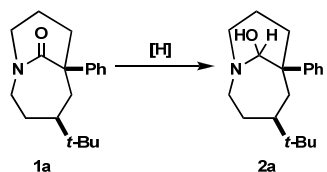

| entry | reagent                              | solvent           | temp.<br>[°C] | time<br>[h] | yield<br>[%]    | dr <sup>a</sup> |
|-------|--------------------------------------|-------------------|---------------|-------------|-----------------|-----------------|
| 1     | NaBH <sub>4</sub>                    | EtOH              | 24            | 20          | 96              | 80:20           |
| 2     | NaBH <sub>4</sub> <sup>b</sup>       | MeOH              | 24            | 20          | 32 <sup>c</sup> | 86:14           |
| 3     | NaBH <sub>4</sub> /CeCl <sub>3</sub> | EtOH              | 24            | 20          | 31 <sup>c</sup> | 81:19           |
| 4     | LiBH <sub>4</sub>                    | EtOH              | 24            | 20          | 94              | 82:18           |
| 5     | LiAl(O <i>t</i> Bu) <sub>3</sub> H   | THF               | 24            | 24          | <5 <sup>d</sup> | nd              |
| 6     | L-Selectride                         | THF               | 24            | 24          | <5 <sup>d</sup> | nd              |
| 7     | LiAlH <sub>4</sub>                   | Et <sub>2</sub> O | 24            | 5           | 99              | 82:18           |
| 8     | Red-Al                               | PhMe              | 110           | 2           | 96              | 80:20           |
| 9     | DIBAL-H                              | PhMe              | 110           | 2           | 97              | 81:19           |
| 10    | BH <sub>3</sub>                      | THF               | 66            | 24          | 47              | 74:26           |
| 11    | LiEt <sub>3</sub> BH                 | THF               | 24            | 3           | 92 <sup>e</sup> | 84:16           |

<sup>a</sup> Determined by <sup>1</sup>H NMR; <sup>b</sup> 4-MeOC<sub>6</sub>H<sub>4</sub> derivative was used; <sup>c</sup> Conversion; <sup>d</sup> Only starting material was observed by <sup>1</sup>H NMR; <sup>e</sup> Combined yield of hemiaminal and primary alcohol **3a** (isolated in 38% and 54% yield, respectively); nd = not determined.

Entry 2: According to the general procedure amide **1b** (0.0205 g, 0.065 mmol, 1.0 equiv) was reacted with NaBH<sub>4</sub> (0.0074 g, 0.20 mmol, 3.0 equiv) in MeOH (3 mL) for 20 h at rt. Analysis of the reaction mixture by <sup>1</sup>H NMR indicated 32% conversion to the aminal **2a**, dr = 86:14.

Entry 3: To a solution of amide **1a** (0.0150 g, 0.053 mmol, 1.0 equiv) in EtOH (10 mL), CeCl<sub>3</sub> (0.019 g, 0.053 mmol, 1.0 equiv) was added, followed by NaBH<sub>4</sub> (0.006 g, 0.16 mmol, 3.0 equiv), and the resulting mixture was stirred at rt for 24 h. Analysis of the crude reaction mixture by <sup>1</sup>H NMR indicated 31% conversion to the aminal **2a**, dr = 81:19.

Entry 4: According to the general procedure amide **1a** (0.0150 g, 0.053 mmol, 1.0 equiv) was reacted with LiBH<sub>4</sub> (0.0037 g, 0.16 mmol, 3.0 equiv) in EtOH (10 mL) for 20 h at rt, to afford aminal **2a**, yield 94% (0.0143 g, 0.050 mmol), dr = 82:18.

Entry 5: To a solution of amide **1a** (0.0150 g, 0.053 mmol, 1.0 equiv) in THF (5 mL), LiAlO*t*Bu (0.068 g, 0.26 mmol, 5.0 equiv) was added at rt, and the reaction mixture

was stirred at rt for 24 h. After aqueous work-up, analysis of the crude reaction mixture indicated only the presence of the starting material.

Entry 6: To a solution of amide **1a** (0.0150 g, 0.053 mmol, 1.0 equiv) in THF (5 mL), L-Selectride (1.0 M in THF, 0.26 mL, 0.26 mmol, 5.0 equiv) was added at rt, and the reaction mixture was stirred at rt for 24 h. After aqueous work-up, analysis of the crude reaction mixture indicated only the presence of the starting material.

Entry 7: To a solution of amide **1a** (0.0150 g, 0.053 mmol, 1.0 equiv) in Et<sub>2</sub>O (5 mL), LiAlH<sub>4</sub> (1.0 M in Et<sub>2</sub>O, 0.16 mL, 0.16 mmol, 3.0 equiv) was added at 0 °C, and the reaction mixture was stirred at rt for 5 h. Fieser and Fieser work-up, followed by chromatography afforded **2a**, yield 99% (0.0150 g, 0.052 mmol), dr = 82:18.

Entry 8: To a solution of amide **1a** (0.0181 g, 0.064 mmol, 1.0 equiv) in toluene (5 mL), Red-Al (65% in toluene, 0.10 mL, 0.31 mmol, 5.0 equiv) was added at rt, and the reaction mixture was heated to reflux for 2 h. Fieser and Fieser work-up, followed by chromatography afforded **2a**, yield 96% (0.0177 g, 0.062 mmol), dr = 80:20.

Entry 9: To a solution of amide **1a** (0.0150 g, 0.053 mmol, 1.0 equiv) in toluene (5 mL), DIBAL-H (1.0 M in toluene, 0.26 mL, 0.26 mmol, 5.0 equiv) was added at rt, and the reaction mixture was heated to reflux for 2 h. Fieser and Fieser work-up, followed by chromatography afforded **2a**, yield 97% (0.0147 g, 0.051 mmol), dr = 81:19.

Entry 10: To a solution of amide **1a** (0.040 g, 0.14 mmol, 1.0 equiv) in THF (10 mL), BH<sub>3</sub>•Me<sub>2</sub>S (2.0 M in THF, 0.35 mL, 0.70 mmol, 5.0 equiv) was added at rt, and the reaction mixture was heated to reflux for 24 h. The reaction was quenched with water, extracted with CH<sub>2</sub>Cl<sub>2</sub>, washed with brine, dried and concentrated. Chromatography afforded **2a**, yield 47% (0.0187 g, 0.065 mmol), dr = 74:26. The remaining mass balance consisted of an unidentified compound (0.0209 g, possibly polymer, R<sub>f</sub> = 0.83, 1/4 EtOAc/hexanes).

Entry 11: To a solution of amide **1a** (0.0150 g, 0.05 mmol, 1.0 equiv) in THF (10 mL), LiEt<sub>3</sub>BH (1.0 M in THF, 0.26 mL, 0.26 mmol, 5.0 equiv) was added dropwise at rt, and the resulting mixture was stirred for 3 h at rt. Aqueous work-up (quench with water, extraction with CH<sub>2</sub>Cl<sub>2</sub>), followed by chromatography (1/10/90 NH<sub>4</sub>OH/MeOH/CH<sub>2</sub>Cl<sub>2</sub>) afforded aminal **2a** (R<sub>f</sub> = 0.45, 1/10/90 NH<sub>4</sub>OH/MeOH/CH<sub>2</sub>Cl<sub>2</sub>), yield 38% (0.0055 g, 0.019 mmol), and alcohol **3a** (R<sub>f</sub> = 0.13, 1/10/90 NH<sub>4</sub>OH/MeOH/CH<sub>2</sub>Cl<sub>2</sub>), yield 54% (0.0078 g, 0.027 mmol).

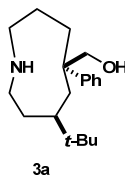

**((7R)-7-tert-Butyl-5-phenylazonan-5-yl)methanol (3a):** <sup>1</sup>H NMR (400 MHz, CDCl<sub>3</sub>) δ 0.40 (s, 9H), 1.25-1.99 (m, 10H), 2.56 (d, *J* = 13.9 Hz, 1H), 2.65-2.90 (m, 4H),

3.54 (d,  $J = 11.4$  Hz, 1H), 3.78 (dd,  $J = 1.4, 11.3$  Hz, 1H), 7.12 (t,  $J = 7.3$  Hz, 1H), 7.27 (t,  $J = 8.2$  Hz, 2H), 7.39 (d,  $J = 7.4$  Hz, 2H);  $^{13}\text{C}$  NMR (100 MHz,  $\text{CDCl}_3$ )  $\delta$  21.1, 23.3, 27.2, 34.2, 34.6, 37.7, 38.8, 47.2, 47.4, 47.8, 68.4, 126.3, 127.5, 128.6, 145.4; IR (neat) 3350, 2947, 2870, 1557, 1487, 1445, 1366, 1034, 911  $\text{cm}^{-1}$ ; HRMS calcd for  $\text{C}_{19}\text{H}_{32}\text{NO}$  ( $\text{M}^+ + \text{H}$ ) 290.2484, found 290.2462. Note: a number of other reductants were also tried (for example,  $\text{Bu}_3\text{SnH}/\text{SiO}_2$ ,  $\text{Ph}_3\text{SiH}$ ,  $\text{NaBH}_4/\text{BF}_3$ ,  $\text{NaBH}_4/\text{TiCl}_4$ ,  $\text{NaCNBH}_3$ ), however no reaction or complex reactions mixtures were obtained.

**Scheme B.** Attempted Reduction of [5.3.1] Bridged System.

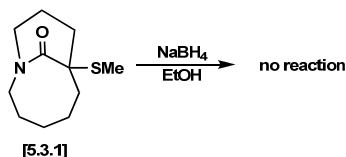

According to the general procedure for reduction of bridged amides, amide [5.3.1]<sup>3</sup> (0.0383 g, 0.18 mmol, 1.0 equiv) was reacted with  $\text{NaBH}_4$  (0.0205 g, 0.54 mmol, 3.0 equiv) in EtOH (10 mL) at rt for 18 h. Analysis of the crude reaction by NMR indicated only the presence of the starting material.

**Synthetic Transformations of Bridged Hemiaminals**

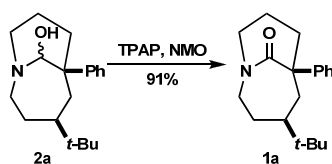

**(4R,6R)-4-tert-Butyl-6-phenyl-1-azabicyclo[4.3.1]decan-10-one (1a).** To a solution of alcohol **2a** (0.0150 g, 0.052 mmol, 1.0 equiv) in  $\text{CH}_2\text{Cl}_2$  (5 mL) containing some MS 4Å, NMO (0.0122 g, 0.104 mmol, 2.0 equiv) and TPAP (0.004 g, 0.01 mmol, 0.2 equiv) were added, and the resulting mixture was stirred at rt for 2 h. After solvent removal, chromatography (1/4 EtOAc/hexanes) afforded the title lactam. Yield 91% (0.0135 g, 0.047 mmol). Spectroscopic properties matched those previously described.<sup>1</sup>

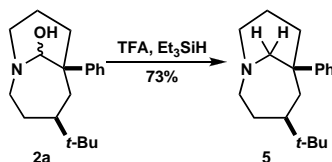

**(4R,6R)-4-tert-Butyl-6-phenyl-1-azabicyclo[4.3.1]decane (5).** To a solution of aminal **2a** (0.0252 g, 0.088 mmol, 1.0 equiv) in  $\text{CH}_2\text{Cl}_2$  (10 mL) TFA (1.0 mL, excess) was added at rt, followed by  $\text{Et}_3\text{SiH}$  (0.014 mL, 10 equiv) after 15 min. The reaction

mixture was warmed stirred at rt for 12 days. Quenched with sat. NaHCO<sub>3</sub>, extracted with CH<sub>2</sub>Cl<sub>2</sub> (3 x 20 mL), washed with brine (1 x 20 mL), dried, and concentrated. Chromatography (1/10/90 NH<sub>4</sub>OH/MeOH/CH<sub>2</sub>Cl<sub>2</sub>) afforded the title product as oil (R<sub>f</sub> = 0.33, 1/10/90 NH<sub>4</sub>OH/MeOH/CH<sub>2</sub>Cl<sub>2</sub>), yield 73% (0.0174 g, 0.064 mmol). <sup>1</sup>H NMR (400 MHz, CDCl<sub>3</sub>) δ 0.89 (s, 9H), 1.25-1.36 (m, 1H), 1.42-1.61 (m, 2H), 1.70 (t, *J* = 12.4 Hz, 1H), 1.78-2.01 (m, 3H), 2.04-2.16 (m, 1H), 2.30 (d, *J* = 13.0 Hz, 1H), 2.61 (td, *J* = 3.6, 13.4 Hz, 1H), 2.91 (d, *J* = 7.2 Hz, 2H), 3.04 (d, *J* = 14.2 Hz, 1H), 3.61-3.72 (m, 2H), 7.18-7.24 (m, 1H), 7.31-7.42 (m, 4H); <sup>13</sup>C NMR (100 MHz, CDCl<sub>3</sub>) δ 21.0, 27.5, 30.0, 33.8, 36.1, 37.4, 46.8, 48.3, 53.3, 54.1, 54.2, 124.6, 125.8, 128.3, 151.9; IR (neat) 3056, 2944, 2917, 2849, 1576, 1540, 1470, 1366, 1100, 1036, 992 cm<sup>-1</sup>; HRMS calcd for C<sub>19</sub>H<sub>30</sub>N (M<sup>+</sup> + H) 272.2378, found 272.2373.

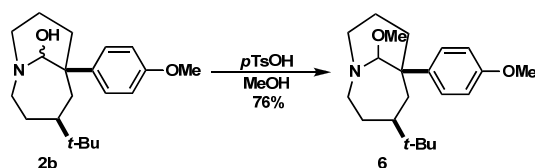

**(4*R*,6*R*)-4-*tert*-Butyl-10-methoxy-6-(4-methoxyphenyl)-1-azabicyclo[4.3.1]**

**decane (6).** To a solution of hemiaminal **2b** (0.0280 g, 0.088 mmol, 1.0 equiv) in MeOH (5 mL), *p*TsOH (0.020 g, 0.11 mmol, 1.2 equiv) was added and the reaction mixture was stirred at rt. After 5 h 1.2 equiv of *p*TsOH was added, and the reaction was stirred for the next 19 h. The reaction was quenched with sat. NaHCO<sub>3</sub>, solvent was removed under reduced pressure, the aqueous layer was extracted with Et<sub>2</sub>O (3 x 30 mL), dried and concentrated. Chromatography (100% EtOAc) afforded the title product as oil (R<sub>f</sub> = 0.90, EtOAc, R<sub>f</sub> = 0.63, 1/10/90 NH<sub>4</sub>OH/MeOH/CH<sub>2</sub>Cl<sub>2</sub>), yield 76% (0.0221 g, 0.067 mmol). Single diastereoisomer, structure not determined. <sup>1</sup>H NMR (400 MHz, CDCl<sub>3</sub>) δ 0.86 (s, 9H), 1.24-1.44 (m, 2H), 1.46-1.52 (m, 1H), 1.73-1.88 (m, 3H), 2.02-2.17 (m, 2H), 2.26-2.36 (m, 1H), 2.50 (dd, *J* = 4.7, 15.0 Hz, 1H), 2.73 (td, *J* = 5.6, 13.0 Hz, 1H), 3.12-3.24 (m, 1H), 3.19 (s, 3H), 3.67 (dd, *J* = 5.2, 13.6 Hz, 1H), 3.81 (s, 3H), 4.41 (s, 1H), 6.86 (d, *J* = 8.8 Hz, 2H), 7.20 (d, *J* = 8.8 Hz, 2H); <sup>13</sup>C NMR (100 MHz, CDCl<sub>3</sub>) δ 21.7, 27.6, 31.1, 31.4, 33.7, 42.1, 45.2, 47.4, 48.1, 53.9, 54.0, 55.2, 90.7, 113.3, 126.0, 143.6, 156.8; IR (neat) 2914, 2866, 1512, 1251, 1186, 1086 cm<sup>-1</sup>; HRMS calcd for C<sub>21</sub>H<sub>34</sub>NO<sub>2</sub> (M<sup>+</sup> + H) 332.2590, found 332.2585.

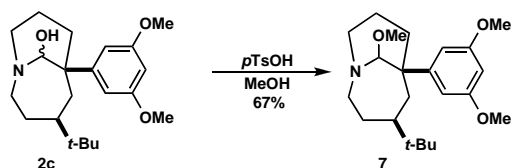

**(4*R*,6*R*)-4-*tert*-Butyl-6-(3,5-dimethoxyphenyl)-10-methoxy-1-azabicyclo[4.3.1]**

**decane (7).** According to the procedure described above, the reaction of the corresponding hemiaminal **2c** (0.0416 g, 0.12 mmol, 1.0 equiv) and *p*TsOH (0.0227 g,

0.12 mmol, 1.0 equiv) in MeOH (10 mL) at rt for 36 h, afforded after chromatography (EtOAc) the title product as oil ( $R_f = 0.72$ , EtOAc,  $R_f = 0.78$ , 1/10/90  $\text{NH}_4\text{OH}/\text{MeOH}/\text{CH}_2\text{Cl}_2$ ), yield 67% (0.0290 g, 0.080 mmol). Single diastereoisomer, structure not determined.  $^1\text{H}$  NMR (400 MHz,  $\text{CDCl}_3$ )  $\delta$  0.86 (s, 9H), 1.26-1.51 (m, 3H), 1.74-1.88 (m, 3H), 1.99-2.13 (m, 2H), 2.24-2.35 (m, 1H), 2.49 (dd,  $J = 5.0, 14.4$  Hz, 1H), 2.71 (td,  $J = 5.7, 13.4$  Hz, 1H), 3.18 (td,  $J = 4.2, 13.3$  Hz, 1H), 3.20 (s, 3H), 3.62-3.69 (m, 1H), 3.82 (s, 6H), 6.31 (t,  $J = 2.0$  Hz, 1H), 6.46 (d,  $J = 2.2$  Hz, 2H);  $^{13}\text{C}$  NMR (100 MHz,  $\text{CDCl}_3$ )  $\delta$  21.8, 27.6, 31.1, 31.4, 33.8, 42.9, 45.1, 47.4, 47.6, 53.9, 54.0, 55.2, 90.7, 96.4, 104.2, 154.0, 160.2; IR (neat) 2941, 2866, 1595, 1456, 1204, 1151, 1084  $\text{cm}^{-1}$ ; HRMS calcd for  $\text{C}_{22}\text{H}_{36}\text{NO}_3$  ( $\text{M}^+ + \text{H}$ ) 362.2695, found 362.2694.

**Scheme C.** Epimerization of Hemiaminal **2a** upon Treatment with Acid.

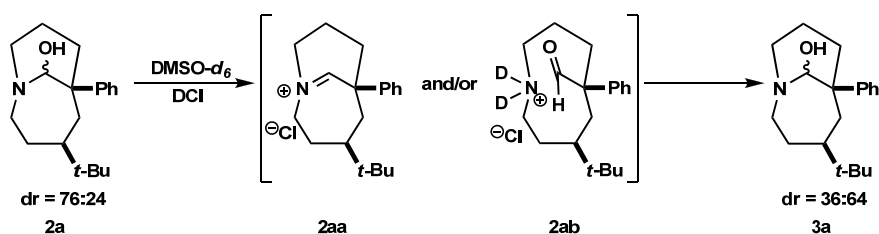

$^1\text{H}$  NMR reference spectrum of **2a** in  $\text{DMSO-}d_6$  indicated dr = 76:24 favoring the same diastereoisomer as in  $\text{CDCl}_3$ . A vial was charged with **2a** (0.010 g, 0.025 mmol),  $\text{DMSO-}d_6$  (0.30 mL), and  $\text{DCl}$  (1.0  $N$  in  $\text{D}_2\text{O}$ , 0.3 mL). The vial was heated with a heat gun until a clear solution was obtained ( $\sim 10$ - $15$  s).  $^1\text{H}$  NMR indicated dr = 36:64 favoring the opposite epimer. The NMR tube was heated with heat gun for  $\sim 5$  min. NMR indicated no change in dr.  $\text{DCl}$  (1.0  $N$  in  $\text{D}_2\text{O}$ , 0.1 mL) was added directly to the NMR tube, and the reaction was heated with a heat gun for  $\sim 1$  min. NMR indicated no change in the dr. Note: a similar change in dr (from 71:29 to 38:62) was observed when  $\text{CD}_3\text{CN}$  was used as a solvent. The epimerization of **2a** could occur either via the intermediate bridged iminium ion **2aa** or through the acid-promoted opening to the aldehyde **2ab** and re-closure to the more thermodynamically favored isomer.

## Organometallic Addition to Bridged Amides

**General procedure:** To a solution of bridged amide (1.0 equiv) in Et<sub>2</sub>O at -78 °C, organometallic reagent (3.0 equiv) was added dropwise. The reaction mixture was stirred at -78 °C for 1 h, allowed to warm slowly to rt, quenched with water (10 mL) after 2 h, extracted with ether (3 x 50 mL), washed with brine (1 x 10 mL) and dried. Chromatography (MeOH/CH<sub>2</sub>Cl<sub>2</sub>) afforded the final products.

**Scheme D.** Synthesis of Compounds **8a-8d** (Table 2).

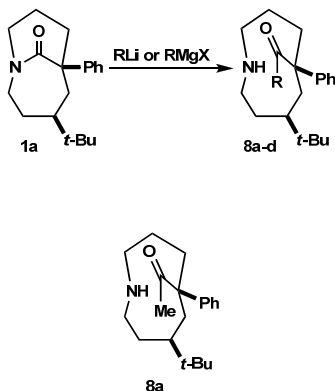

**1-((5R,7R)-7-tert-Butyl-5-phenylazonan-5-yl)ethanone (8a).** According to the general procedure, the reaction of **1a** (0.0100 g, 0.035 mmol, 1.0 equiv) and MeLi (1.6 M in Et<sub>2</sub>O, 0.070 mL, 0.11 mmol, 3.0 equiv) in Et<sub>2</sub>O (5.0 mL), afforded after chromatography (1/10/90 NH<sub>4</sub>OH/MeOH/CH<sub>2</sub>Cl<sub>2</sub>) the title compound as oil (R<sub>f</sub> = 0.31-0.62, 1/10/90 NH<sub>3</sub>/MeOH/CH<sub>2</sub>Cl<sub>2</sub>). Yield 89% (0.0094 g, 0.031 mmol). <sup>1</sup>H NMR (400 MHz, CDCl<sub>3</sub>) δ 0.38 (s, (9H), 1.38-1.99 (m, 9H), 1.91 (s, 3H), 2.18 (dd, *J* = 3.8, 12.7 Hz, 1H), 2.68-2.96 (m, 4H), 7.18-7.32 (m, 5H); <sup>13</sup>C NMR (100 MHz, CDCl<sub>3</sub>) δ 21.2, 24.0, 26.4, 27.4, 33.4, 33.8, 34.0, 37.6, 43.3, 46.4, 60.5, 126.8, 127.6, 128.5, 144.1, 211.7; IR (neat) 2947, 2868, 1701, 1477, 1364, 1169, 1144 cm<sup>-1</sup>; HRMS calcd for C<sub>20</sub>H<sub>32</sub>NO (M<sup>+</sup> + H) 302.2484, found 302.2474. Note: the reaction of **1a** (0.0100 g, 0.035 mmol, 1.0 equiv) and MeLi•LiBr (1.5 M, Et<sub>2</sub>O, 0.070 mL, 0.11 mmol, 3.0 equiv) in Et<sub>2</sub>O (5 mL) afforded **8a** in 85% yield (0.0090 g, 0.030 mmol). Resubmission of **8a** (0.0094 g, 0.031 mmol) to the reaction with MeLi (1.6 M, Et<sub>2</sub>O, 0.06 mL, 3.0 equiv) in Et<sub>2</sub>O (10 mL) for 3 h led to quantitative recovery of **8a**, suggesting that the further addition does not occur due to the steric hindrance around the ketone. Note: the reaction of **1a** (0.010 g, 0.035 mmol, 1.0 equiv) and MeMgI (3.0 M in Et<sub>2</sub>O, 0.035 mL, 0.11 mmol, 3.0 equiv) in Et<sub>2</sub>O (10 mL) for 24 h, afforded **8a** in 73% yield (0.0077 g, 0.026 mmol) (Table 2, entry 2).

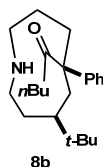

**1-((5R,7R)-7-tert-Butyl-5-phenylazonan-5-yl)pentan-1-one (8b).** According to the general procedure, the reaction of **1a** (0.0200 g, 0.070 mmol, 1.0 equiv) and *n*BuLi (2.3 M in hexanes, 0.090 mL, 0.21 mmol, 3.0 equiv) in Et<sub>2</sub>O (10 mL), afforded after chromatography (1/10/90 NH<sub>4</sub>OH/MeOH/CH<sub>2</sub>Cl<sub>2</sub>) the title compound as oil (*R*<sub>f</sub> = 0.73, 1/10/90 NH<sub>3</sub>/MeOH/CH<sub>2</sub>Cl<sub>2</sub>). Yield 83% (0.0200 g, 0.058 mmol). <sup>1</sup>H NMR (400 MHz, CDCl<sub>3</sub>) δ 0.40 (s, 9H), 0.80 (t, *J* = 7.3 Hz, 3H), 1.09-1.22 (m, 2H), 1.26-1.35 (m, 1H), 1.37-1.58 (m, 5H), 1.64 (d, *J* = 16.0 Hz, 1H), 1.72-1.84 (m, 1H), 1.98-2.10 (m, 1H), 2.11-2.8 (m, 4H), 2.69-2.95 (m, 5H), 7.18-7.38 (m, 5H); <sup>13</sup>C NMR (100 MHz, CDCl<sub>3</sub>) δ 13.9, 21.3, 22.4, 24.0, 26.8, 27.3, 33.3, 34.0, 34.1, 37.5, 37.9, 43.4, 46.4, 60.3, 126.8, 127.7, 128.5, 144.1, 213.7; IR (neat) 3369, 2955, 2870, 1701, 1474, 1364, 1130, 702 cm<sup>-1</sup>; HRMS calcd for C<sub>23</sub>H<sub>38</sub>NO (M<sup>+</sup> + H) 344.2954, found 344.2944.

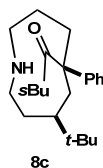

**1-((5R,7R)-7-tert-Butyl-5-phenylazonan-5-yl)-2-methylbutan-1-one (8c).** According to the general procedure, the reaction of **1a** (0.0200 g, 0.070 mmol, 1.0 equiv) and *sec*-BuLi (1.4 M in cyclohexane, 0.15 mL, 0.21 mmol, 3.0 equiv) in Et<sub>2</sub>O (10 mL), afforded after chromatography (1/10/90 NH<sub>4</sub>OH/MeOH/CH<sub>2</sub>Cl<sub>2</sub>) the title compound as oil (*R*<sub>f</sub> = 0.54, 1/10/90 NH<sub>3</sub>/MeOH/CH<sub>2</sub>Cl<sub>2</sub>). Yield 93% (0.0223 g, 0.065 mmol). <sup>1</sup>H NMR (400 MHz, CDCl<sub>3</sub>) δ 0.44, 0.46 (s, 9H), 0.59 (t, *J* = 7.5 Hz, 1H), 0.78-0.85 (m, 3H), 0.99 (d, *J* = 6.7 Hz, 2H), 1.19-1.68 (m, 7H), 1.70-1.81 (m, 2H), 2.01-2.13 (m, 1H), 2.28-2.41 (m, 2H), 2.64-2.93 (m, 4H), 2.97-3.09 (m, 1H), 7.18-7.35 (m, 5H); <sup>13</sup>C NMR (100 MHz, CDCl<sub>3</sub>) (mixture of rotamers) δ 11.3, 11.4, 17.6, 18.5, 23.1, 23.9, 24.2, 27.3, 27.4, 27.5, 28.4, 34.2, 34.3, 35.6, 35.9, 37.5, 37.7, 42.7, 43.1, 46.3, 46.4, 47.4, 60.8, 60.9, 126.8, 126.8, 128.1, 128.2, 128.3, 128.3, 142.9, 143.1, 217.7, 217.8; IR (neat) 3373, 2961, 2873, 1699, 1464, 1366, 1148, 1013, 733, 702 cm<sup>-1</sup>; HRMS calcd for C<sub>23</sub>H<sub>38</sub>NO (M<sup>+</sup> + H) 344.2954, found 344.2939.

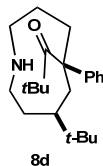

**1-((5R,7R)-7-tert-Butyl-5-phenylazonan-5-yl)-2,2-dimethylpropan-1-one (8d).** According to the general procedure, the reaction of **1a** (0.0200 g, 0.070 mmol, 1.0 equiv) and *tert*-BuLi (1.7 M in pentanes, 0.12 mL, 0.21 mmol, 3.0 equiv) in Et<sub>2</sub>O (10 mL),

afforded after chromatography (1/10/90 NH<sub>4</sub>OH/MeOH/CH<sub>2</sub>Cl<sub>2</sub>) the title compound as oil ( $R_f = 0.37$ , 1/10/90 NH<sub>3</sub>/MeOH/CH<sub>2</sub>Cl<sub>2</sub>). Yield 80% (0.0192 g, 0.056 mmol). <sup>1</sup>H NMR (400 MHz, CDCl<sub>3</sub>)  $\delta$  0.39 (s, 9H), 0.98 (s, 9H), 1.24-1.44 (m, 2H), 1.45-1.66 (m, 3H), 1.77-1.88 (m, 1H), 2.21-2.34 (m, 1H), 2.36 (dd,  $J = 5.2, 15.8$  Hz, 1H), 2.75-3.04 (m, 6H), 7.18-7.34 (m, 5H); <sup>13</sup>C NMR (100 MHz, CDCl<sub>3</sub>)  $\delta$  22.0, 22.5, 27.2, 30.3, 33.7, 34.2, 37.2, 38.0, 45.0, 46.1, 46.5, 61.0, 126.8, 127.9, 128.3, 143.4, 217.4; IR (neat) 3377, 2959, 2870, 1680, 1479, 1364, 1146, 1090, 1005, 910, 735, 704 cm<sup>-1</sup>; HRMS calcd for C<sub>23</sub>H<sub>38</sub>NO ( $M^+ + H$ ) 344.2954, found 344.2924.

**Scheme E.** Synthesis of Compounds **9a-10c** (Table 3).

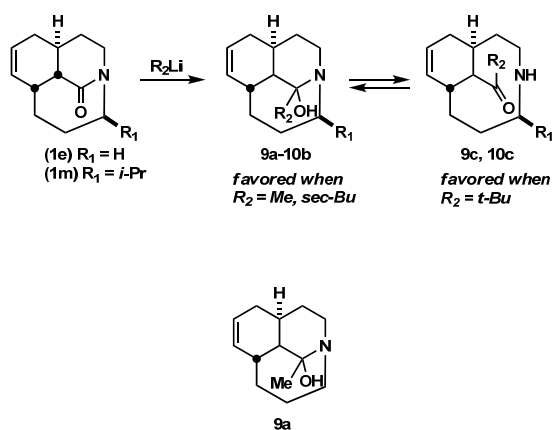

**Hemiaminal 9a.** According to the general procedure, the reaction of **1e** (0.0189 g, 0.099 mmol, 1.0 equiv) and MeLi (1.6 M in Et<sub>2</sub>O, 0.20 mL, 0.30 mmol, 3.0 equiv) in Et<sub>2</sub>O (10 mL), afforded after chromatography (1/10/90 NH<sub>4</sub>OH/MeOH/CH<sub>2</sub>Cl<sub>2</sub>) the title compound as solid (Mp = 107-108 °C,  $R_f = 0.10$ , 1/10/90 NH<sub>3</sub>/MeOH/CH<sub>2</sub>Cl<sub>2</sub>). Yield 95% (0.0194 g, 0.094 mmol), dr > 10:1, structure not determined. <sup>1</sup>H NMR (400 MHz, CDCl<sub>3</sub>)  $\delta$  1.23-1.41 (m, 2H), 1.52 (s, 3H), 1.64-1.82 (m, 3H), 1.84-1.95 (m, 2H), 1.96-2.11 (m, 2H), 2.35 (q,  $J = 14.4$  Hz, 1H), 2.40-2.48 (m, 1H), 2.54-2.77 (m, 2H), 2.86 (s, 1H), 3.05 (t,  $J = 13.5$  Hz, 1H), 3.34-3.50 (m, 1H), 5.65 (s, 1H), 5.74 (s, 1H); <sup>13</sup>C NMR (125 MHz, CDCl<sub>3</sub>)  $\delta$  24.4, 25.8, 27.3, 31.4, 34.7, 34.9, 35.3, 49.4, 51.8, 52.6, 86.5, 127.6, 134.9; IR (neat) 3350, 3011, 2949, 2914, 2866, 1462, 1447, 1369, 1292, 1163, 1134, 1018, 924, 731, 708 cm<sup>-1</sup> Note: ketone peak not detected in the IR spectrum; HRMS calcd for C<sub>13</sub>H<sub>22</sub>NO ( $M^+ + H$ ) 208.1701, found 208.1706.



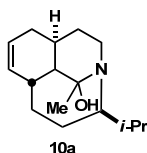

**Hemiaminal 10a.** According to the general procedure, the reaction of **1m** (0.0200 g, 0.086 mmol, 1.0 equiv) and MeLi (1.6 M in Et<sub>2</sub>O, 0.17 mL, 0.26 mmol, 3.0 equiv) in Et<sub>2</sub>O (10 mL), afforded after chromatography (1/10/90 NH<sub>4</sub>OH/MeOH/CH<sub>2</sub>Cl<sub>2</sub>) the title compound as oil (R<sub>f</sub> = 0.20, 1/10/90 NH<sub>3</sub>/MeOH/CH<sub>2</sub>Cl<sub>2</sub>). Yield 92% (0.0196 g, 0.079 mmol), dr > 10:1, structure not determined. <sup>1</sup>H NMR (500 MHz, CDCl<sub>3</sub>) δ 0.68-0.93 (m, 6H), 1.26 (d, *J* = 13.8 Hz, 1H), 1.31-1.42 (m, 1H), 1.49 (s, 3H), 1.57 (m, 4H), 1.71-1.83 (m, 2H), 1.86-1.92 (m, 1H), 1.97 (dt, *J* = 4.0, 16.9 Hz, 1H), 2.22-2.43 (m, 2H), 2.54-2.66 (m, 2H), 2.69-2.78 (m, 1H), 3.22-3.33 (m, 1H), 5.47 (s, 1H), 5.75 (s, 1H); <sup>13</sup>C NMR (125 MHz, CDCl<sub>3</sub>) δ 17.5, 19.3, 24.9, 26.5, 28.5, 32.9, 34.5, 35.5, 35.8, 49.6, 50.2, 73.5, 86.1, 125.4, 135.6; IR (neat) 3589, 3460, 3011, 2951, 2914, 1968, 1713 (vw), 1632, 1464, 1371, 1219, 1169, 1113, 1055, 943, 703 cm<sup>-1</sup>; HRMS calcd for C<sub>16</sub>H<sub>28</sub>NO (M<sup>+</sup> + H) 250.2171, found 250.2164.

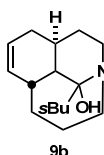

**Hemiaminal 9b.** According to the general procedure, the reaction of **1e** (0.0164 g, 0.086 mmol, 1.0 equiv) and *sec*-BuLi (1.4 M in cyclohexane, 0.18 mL, 0.26 mmol, 3.0 equiv) in Et<sub>2</sub>O (10 mL), afforded after chromatography (1/10/90 NH<sub>4</sub>OH/MeOH/CH<sub>2</sub>Cl<sub>2</sub>) the title compound as oil (R<sub>f</sub> = 0.57, 1/10/90 NH<sub>3</sub>/MeOH/CH<sub>2</sub>Cl<sub>2</sub>). Yield 80% (0.0172 g, 0.069 mmol). <sup>1</sup>H NMR (400 MHz, CDCl<sub>3</sub>) δ 0.78-2.25 (m, 19H), 2.31-2.52 (m, 2H), 2.582-.67 (m, 2H), 2.702-.85 (m, 1H), 3.38-3.46 (m, 1H), 5.48-5.67 (m, 2H) <sup>13</sup>C NMR (125 MHz, CDCl<sub>3</sub>) δ 10.7, 11.4, 11.8, 13.6, 20.7, 23.7, 23.7, 24.4, 25.1, 25.2, 33.3, 33.4, 33.9, 34.3, 34.4, 37.5, 37.9, 48.6, 48.7, 50.5, 50.6, 88.2, 88.4, 126.4, 134.1, 134.1 IR (neat) 3591, 3450, 3013, 2963, 2916, 2870, 1653, 1540, 1456, 1379, 1292, 1259, 1113, 1057, 1021, 912, 802, 744 cm<sup>-1</sup> Note: ketone peak not detected in the IR spectrum; HRMS calcd for C<sub>16</sub>H<sub>28</sub>NO (M<sup>+</sup> + H) 250.2171, found 250.2185.

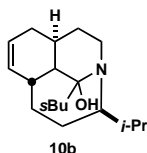

**Hemiaminal 10b.** According to the general procedure, the reaction of **1m** (0.0200 g, 0.086 mmol, 1.0 equiv) and *sec*-BuLi (1.4 M in cyclohexane, 0.18 mL, 0.26 mmol, 3.0 equiv) in Et<sub>2</sub>O (10 mL), afforded after chromatography (1/1 EtOAc/hexanes) the title compound as oil (R<sub>f</sub> = 0.26, 1/1 EtOAc/hexanes). Yield 88% (0.0219 g, 0.075 mmol). <sup>1</sup>H NMR (400 MHz, CDCl<sub>3</sub>) δ 0.82-1.07 (m, 12H), 1.21-1.46 (m, 3H), 1.58-1.86 (m, 6H),

1.92-2.17 (m, 4H), 2.26-2.38 (m, 1H), 2.47 (q,  $J = 13.6$  Hz, 1H), 2.53-2.62 (m, 1H), 2.68-2.82 (m, 2H), 3.06-3.19 (m, 1H), 5.51-5.58 (m, 1H), 5.84-5.92 (m, 1H);  $^{13}\text{C}$  NMR (125 MHz,  $\text{CDCl}_3$ ) (mixture of rotamers)  $\delta$  13.2, 13.3, 14.1, 18.4, 18.5, 18.8, 19.0, 23.4, 24.2, 26.1, 26.3, 27.8, 28.1, 28.5, 32.8, 35.2, 35.3, 35.5, 35.6, 35.7, 44.3, 44.5, 45.8, 49.7, 49.8, 73.2, 88.2, 88.4, 125.3, 136.1; IR (neat) 3595, 3013, 3959, 3013, 2959, 2870, 2829, 1705 (vw), 1634, 1464, 1381, 1258, 1163, 1107, 1061, 1011, 808, 704  $\text{cm}^{-1}$ ; HRMS calcd for  $\text{C}_{19}\text{H}_{34}\text{NO}$  ( $\text{M}^+ + \text{H}$ ) 292.2641, found 292.2642.

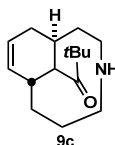

**1-((1S,8R)-4-Azabicyclo[6.3.1]dodec-9-en-12-yl)-2,2-dimethylpropan-1-one (9c).**

According to the general procedure, the reaction of **1e** (0.0200 g, 0.105 mmol, 1.0 equiv) and *tert*-BuLi (1.7 M in pentanes, 0.18 mL, 0.31 mmol, 3.0 equiv) in  $\text{Et}_2\text{O}$  (10 mL), afforded after chromatography (1/10/90  $\text{NH}_4\text{OH}/\text{MeOH}/\text{CH}_2\text{Cl}_2$ ) the title compound as oil ( $R_f = 0.14$ , 1/10/90  $\text{NH}_3/\text{MeOH}/\text{CH}_2\text{Cl}_2$ ). Yield 90% (0.0235 g, 0.094 mmol).  $^1\text{H}$  NMR (400 MHz,  $\text{CDCl}_3$ )  $\delta$  1.14 (s, 9H), 1.17-1.34 (m, 3H), 1.56-1.68 (m, 1H), 1.72-1.96 (m, 4H), 2.07-2.17 (m, 1H), 2.46 (s, 1H), 2.67-2.84 (m, 2H), 2.89-2.97 (m, 1H), 3.18-3.27 (m, 2H), 3.36-3.46 (m, 1H), 5.51-5.58 (m, 1H), 5.85-5.92 (m, 1H);  $^{13}\text{C}$  NMR (100 MHz,  $\text{CDCl}_3$ ) (mixture of ketone and enol tautomers)  $\delta$  26.4, 28.8, 29.2, 29.6, 30.6, 38.6, 42.5, 45.6, 49.9, 50.8, 52.6, 130.7, 132.5, 218.5; IR (neat) 3391, 3015, 2951, 2918, 2868, 1705, 1541, 1477, 1441, 1389, 1364, 1317, 1099, 916, 735  $\text{cm}^{-1}$ ; HRMS calcd for  $\text{C}_{16}\text{H}_{28}\text{NO}$  ( $\text{M}^+ + \text{H}$ ) 250.2171, found 250.2175. Note: after chromatography partial closure to the hemiaminal was observed ( $^{13}\text{C}$  NMR,  $\delta$  81.4 ppm).

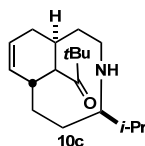

**1-((1S,5R,8R)-5-Isopropyl-4-azabicyclo[6.3.1]dodec-9-en-12-yl)-2,2-dimethylpropan-1-one (10c).** According to the general procedure, the reaction of **1m** (0.0200 g, 0.086 mmol, 1.0 equiv) and *tert*-BuLi (1.7 M in pentanes, 0.15 mL, 0.26 mmol, 3.0 equiv) in  $\text{Et}_2\text{O}$  (10 mL), afforded after chromatography (1/10/90  $\text{NH}_4\text{OH}/\text{MeOH}/\text{CH}_2\text{Cl}_2$ ) the title compound as oil ( $R_f = 0.27$ , 1/10/90  $\text{NH}_3/\text{MeOH}/\text{CH}_2\text{Cl}_2$ ). Yield 90% (0.0226 g, 0.078 mmol).  $^1\text{H}$  NMR (400 MHz,  $\text{CDCl}_3$ )  $\delta$  0.88-0.98 (m, 6H), 1.13 (s, 9H), 1.21-1.37 (m, 3H), 1.52-1.81 (m, 3H), 1.86-2.29 (m, 5H), 2.31-2.80 (m, 4H), 3.16-3.32 (m, 1H), 5.57-5.71 (m, 1H), 5.82-5.95 (m, 1H);  $^{13}\text{C}$  NMR (125 MHz,  $\text{CDCl}_3$ ) (mixture of slowly equilibrating ketone and enol tautomers)  $\delta$  19.9, 21.4, 21.7, 24.7, 26.0, 26.1, 26.4, 28.8, 29.7, 30.2, 30.9, 32.5, 34.0, 36.6, 37.2, 38.8, 40.9, 43.1, 43.2, 45.7, 46.0, 50.9, 52.8, 130.4, 131.2, 132.7, 132.9, 219.2, 220.5; IR (neat) 3597, 3375, 3013, 2955, 2924, 2868, 1697, 1626, 1466, 1387, 1366, 1261, 1099, 910, 804  $\text{cm}^{-1}$ ; HRMS calcd for  $\text{C}_{19}\text{H}_{34}\text{NO}$

( $M^+ + H$ ) 292.2641, found 292.2636. Note: we have observed a similar keto-enol equilibration in analogous 9-membered heterocycles, in which  $\alpha$ -position relative to the ketone is unsubstituted (for example, compounds resulting from organometallic addition to bridged bicyclic lactam **1g**). We think that the unusually high contribution from the enol tautomer arises from a transannular stabilization of the enol by the amine placed on the opposite side of the medium-sized ring. We are investigating this and related interactions between amines and electrophilic components moved one-carbon away from the medium-sized rings in a broader context.

### Organometallic Addition to Planar Analogues of Bridged Amides

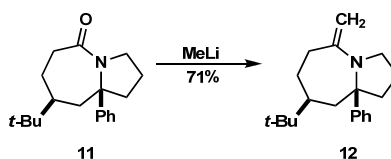

**(8S,9aR)-8-tert-Butyl-5-methylene-9a-phenyloctahydro-1H-pyrrolo[1,2-a]azepine (12).** According to the general procedure, the reaction of planar amide **11** (0.0200 g, 0.070 mmol, 1.0 equiv) and MeLi•LiBr (1.5 M in Et<sub>2</sub>O, 0.14 mL, 0.21 mmol, 3.0 equiv) in Et<sub>2</sub>O (5 mL) for 18 h, afforded after chromatography (1/15/85 NH<sub>4</sub>OH/MeOH/CH<sub>2</sub>Cl<sub>2</sub>) the title product as oil ( $R_f = 0.28$ , NH<sub>4</sub>OH/MeOH/CH<sub>2</sub>Cl<sub>2</sub>), yield 71% (0.0141 g, 0.050 mmol). <sup>1</sup>H NMR (500 MHz, CDCl<sub>3</sub>)  $\delta$  0.84 (s, 9H), 1.12-1.78 (m, 7H), 1.85-2.35 (m, 5H), 2.84-3.61 (m, 3H), 7.02-7.30 (m, 5H); <sup>13</sup>C NMR (100 MHz, CDCl<sub>3</sub>)  $\delta$  20.7, 27.2, 27.7, 29.3, 31.7, 32.6, 39.8, 41.0, 43.3, 49.2, 69.1, 74.5, 125.1, 126.1, 126.7, 128.1, 150.6, 151.8; IR (neat) 2959, 2866, 1632, 1445, 1366, 731, 702 cm<sup>-1</sup>; HRMS calcd for C<sub>20</sub>H<sub>30</sub>N ( $M^+ + H$ ) 284.2378, found 284.2373. The structure of enamine was confirmed by reduction under acidic conditions to the corresponding amine (NaBH<sub>4</sub>, AcOH, THF, rt, 5 h, 83% yield). Note: the dehydration was not general and for example, addition of *n*-BuLi to **1a** resulted in a complex mixture of products including starting material, ketone, enamine, and alcohol. Furthermore, we determined that in the case of planar amides, the reaction time was longer than with the bridged lactams (for example, after 3 h of the reaction with MeLi, bridged **1a** >95% conversion vs. fused **11** ~70% conversion).

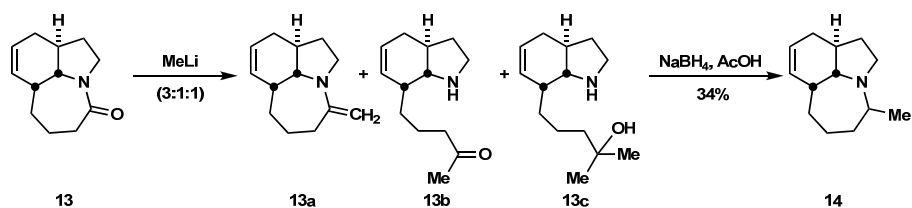

Amine **14**. According to the general procedure for addition of organometallic reagents, the planar amide **13** (0.080 g, 0.43 mmol, 1.0 equiv) was reacted with MeLi•LiBr (1.5 M in Et<sub>2</sub>O, 0.84 mL, 1.26 mmol, 3.0 equiv) in Et<sub>2</sub>O (10 mL) for 18 h. Analysis of the crude reaction mixture indicated presence of enamine **13a**, ketone **13b** and alcohol **13c** in 3:1:1 ratio as judged by <sup>1</sup>H NMR. Due to the very similar and high polarity the products could not be separated at this stage. Diagnostic peaks: Compound **13a**: <sup>13</sup>C NMR (100 MHz, CDCl<sub>3</sub>) δ 24.9, 26.4, 28.7, 29.9, 31.2, 37.1, 38.3, 47.4, 64.2, 74.7, 126.0, 131.5, 151.8; HRMS calcd for C<sub>13</sub>H<sub>20</sub>N (M<sup>+</sup> + H) 190.1596, found 190.1597. Compounds **13b** and **13c**: <sup>13</sup>C NMR (100 MHz, CDCl<sub>3</sub>) δ 22.0, 22.7, 29.0, 29.3, 29.9, 31.0, 32.2, 35.7, 38.0, 38.1, 44.0, 44.1, 44.8, 63.6, 63.7, 70.8, 126.8, 127.1, 130.5, 130.9, 209.0; HRMS calcd for C<sub>13</sub>H<sub>22</sub>NO (M<sup>+</sup> + H) 208.1701, found 208.1734; HRMS calcd for C<sub>14</sub>H<sub>26</sub>NO (M<sup>+</sup> + H) 224.2014, found 224.2036. IR (neat) 3339, 3017, 2920, 2868, 1715, 1613, 1408, 1356, 1161 cm<sup>-1</sup>. The above crude reaction mixture was taken in THF (5 mL), NaBH<sub>4</sub> (0.005 g, 0.13 mmol, 5.0 equiv), followed by AcOH (0.05 mL, 0.86 mmol, 20 equiv) were added at rt, and the resulting mixture was stirred at rt for 5 h. The reaction was diluted with ether (15 mL), quenched with sat. NaHCO<sub>3</sub>, washed with brine, dried and concentrated. Chromatography (1/4 EtOAc/hexanes) afforded **3c** as oil (R<sub>f</sub> = 0.82, 1/4 EtOAc/hexanes), yield 34% (2 steps, 0.0271 g, 0.14 mmol). Single diastereoisomer, structure not determined. <sup>1</sup>H NMR (500 MHz, CDCl<sub>3</sub>) δ 1.18-2.22 (m, 10 H), 1.35 (d, *J* = 6.8 Hz, 3H), 2.33 (dt, *J* = 4.5, 17.4 Hz, 1H), 2.65 (s, 1H), 2.86-3.08 (m, 2H), 3.14-3.26 (m, 1H), 3.87 (dd, *J* = 4.0, 13.2 Hz, 1H), 5.34-5.43 (m, 1H), 5.57-5.66 (m, 1H); <sup>13</sup>C NMR (100 MHz, CDCl<sub>3</sub>) δ 22.2, 29.0, 30.7, 31.8, 32.8, 33.8, 35.3, 37.8, 54.9, 67.2, 79.2, 124.5, 132.8; IR (neat) 3019, 2920, 2851, 2352, 1450, 1383, 1196, 1163, 1084, 1013, 849 cm<sup>-1</sup>; HRMS calcd for C<sub>13</sub>H<sub>22</sub>N (M<sup>+</sup> + H) 192.1752, found 192.1763.

## Transannular Interaction in Bicyclic System

Scheme F. Transannular  $N^{\cdots}C=O$  Interaction in Bicyclic System.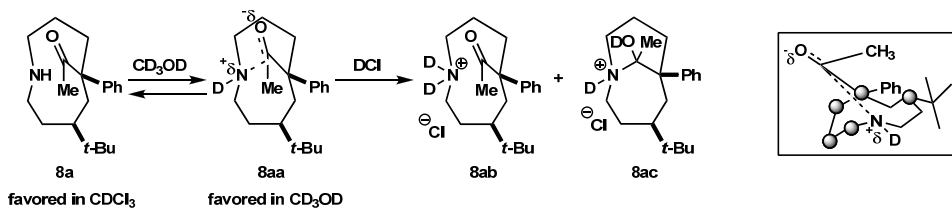

According to the general procedure for addition of organometallic reagents, amide **1a** (0.0300 g, 0.105 mmol, 1.0 equiv) was reacted with  $MeLi \cdot LiBr$  (1.5 M in  $Et_2O$ , 0.36 mL, 0.53 mmol, 5.0 equiv). After aqueous work-up, crude NMR ( $CDCl_3$ ) indicated the presence of **8a** as a single major product. Purification by chromatography (1/10/90  $NH_3/MeOH/CH_2Cl_2$ ) afforded **8a** in 99% yield (0.0313 g, 0.104 mmol).  $^1H$  NMR and  $^{13}C$  NMR ( $CDCl_3$ , 0.75 mL, 1000 scans) were identical with the previously described for **8a**;  $^1H$  NMR (400 MHz,  $CDCl_3$ )  $\delta$  0.38 (s, (9H), 1.38-1.99 (m, 9H), 1.91 (s, 3H), 2.18 (dd,  $J = 3.8, 12.7$  Hz, 1H), 2.68-2.96 (m, 4H), 7.18-7.32 (m, 5H);  $^{13}C$  NMR (100 MHz,  $CDCl_3$ )  $\delta$  21.2, 24.0, 26.4, 27.4, 33.4, 33.8, 34.0, 37.6, 43.3, 46.4, 60.5, 126.8, 127.6, 128.5, 144.1, 211.7; no change was observed in comparison with the crude spectra, indicating that standard purification on  $SiO_2$  does not influence the interaction between the ketone and the amine groups.

The solvent was removed, sample was dissolved in  $MeOD-d_4$  (0.75 mL), and NMR spectra were recorded after  $\sim 3$  min. Major changes were not observed in  $^1H$  NMR, however  $^{13}C$  NMR indicated significant broadening of 7 peaks. Despite much longer acquisition time (23 700 scans) ketone peak was not detected. Compound **8aa**:  $^1H$  NMR (400 MHz,  $CD_3OD$ )  $\delta$  0.47 (s, 9H), 1.44 (s, 2H), 1.63 (d,  $J = 15.5$  Hz, 3H), 1.78-1.92 (m, 1H), 1.83 (s, 3H), 2.20 (dd,  $J = 4.8, 15.6$  Hz, 2H), 2.58 (d,  $J = 14.0$  Hz, 1H), 2.71-2.84 (m, 2H), 2.84-3.02 (m, 2H), 7.19-7.38 (m, 5H);  $^{13}C$  NMR (100 MHz,  $CD_3OD$ )  $\delta$  20.3, 25.0 (br), 25.2, 26.5, 31.2, 33.5, 34.5 (br), 38.6 (br), 43.2 (br), 45.8, 58.7 (br), 126.6, 127.2, 128.3, 144.5 (br). 2D NMR correlations allowed for assignment of carbons corresponding to the broadened peaks, suggesting that the transannular interaction takes place over the western part of the amino-ketone (Scheme F, box, shaded circles).

24 h after dissolution of **8a** in  $MeOD-d_4$ ,  $^1H$  NMR was identical to the described above, for  $t = \sim 3$  min. Next, 0.75 mL of  $MeOD-d_4$  was added to the NMR tube, and 1/2 of the resulting mixture was transferred to 5 mL round bottom flask, evaporated to dryness, and dissolved in  $CDCl_3$ . NMR was identical to the described above for **8a** in  $CDCl_3$ , indicating that the interaction is reversible. To the remaining part of **8aa** in  $MeOD-d_4$ , 0.2 mL of 1.0 N  $DCl$  in  $D_2O$  was added, the NMR tube was wrapped in parafilm, and the reaction was mixed by turning the NMR tube upside down 5 times, followed by gentle shaking. NMR (recorded  $\sim 5$  min after addition of acid) indicated 89:11 mixture of the protonated **8ab** and hemiaminal **8ac**. As expected, upon addition of acid peaks were much sharper than in  $MeOD-d_4$  alone indicating that this time the interaction does not occur;  $^{13}C$  NMR (0.60 mL, 4000 scans) showed a sharp ketone peak

at 213.4 ppm, and a hemiaminal peak at 94.0 ppm. The ratio of **8ab** to **8ac** did not change after the next 24 h.

Protonated **8ab**:  $^1\text{H}$  NMR (400 MHz,  $\text{CD}_3\text{OD}$ )  $\delta$  0.42 (s, 9H), 1.31 (s, 1H), 1.52-1.73 (m, 2H), 1.78 (d,  $J = 16.2$ , 1H), 1.92-2.05 (m, 1H), 1.98 (s, 3H), 2.14 (td,  $J = 5.1, 16.4$  Hz, 1H), 2.40-2.49 (m, 2H), 3.19-3.41 (m, 5H), 7.20-7.42 (m, 5H);  $^{13}\text{C}$  NMR (100 MHz,  $\text{CD}_3\text{OD}$ )  $\delta$  17.7, 24.9, 25.6, 26.2, 28.6, 33.6, 33.8, 39.0, 42.3, 44.8, 59.9, 127.3, 127.4, 128.8, 142.3, 213.4. Hemiaminal **8ac**:  $^1\text{H}$  NMR (400 MHz,  $\text{CD}_3\text{OD}$ ) (diagnostic peaks)  $\delta$  0.89 (s, 9H), 1.87 (t,  $J = 11.5$  Hz, 1H), 2.30-2.40 (m, 2H), 2.60-2.72 (m, 1H), 3.11-3.21 (m, 1H), 3.54 (td,  $J = 5.0, 14.1$  Hz, 1H), 4.01-4.09 (m, 1H);  $^{13}\text{C}$  NMR (100 MHz,  $\text{CD}_3\text{OD}$ )  $\delta$  17.7, 24.4, 26.5, 27.0, 30.1, 33.5, 41.6, 45.2, 46.1, 50.0, 53.0, 94.1, 126.5, 127.3, 128.1, 147.1.

Note: we determined that a similar interaction does not occur upon dissolution of **8a** in  $\text{C}_6\text{D}_6$  and  $\text{CD}_3\text{CN}$ , however in  $\text{DMSO-}d_6$  NMR indicated formation of a ca. 3:1 mixture of amino ketone **8a** and hemiaminal **8ac**. Further studies addressing this type of transannular interactions are in progress.

Compound **8a** in  $\text{C}_6\text{D}_6$ .  $^1\text{H}$  NMR (400 MHz,  $\text{C}_6\text{D}_6$ )  $\delta$  0.61 (s, 9H), 1.21 (s, 2H), 1.48 (s, 1H), 1.62-1.78 (m, 4H), 1.85 (s, 3H), 1.92 (d,  $J = 16.3$  Hz, 1H), 2.38-2.72 (m, 5H), 3.10 (d,  $J = 11.6$  Hz, 1H), 7.07-7.40 (m, 5H);  $^{13}\text{C}$  NMR (100 MHz,  $\text{C}_6\text{D}_6$ )  $\delta$  21.4, 23.9, 25.9, 27.5, 33.7, 33.9, 34.5, 37.6, 43.3, 46.3, 60.5, 126.7, 144.8, 209.1.

Compound **8a** in  $\text{CD}_3\text{CN}$ .  $^1\text{H}$  NMR (400 MHz,  $\text{CD}_3\text{CN}$ )  $\delta$  0.41 (s, 9H), 1.21-1.65 (m, 6H), 1.76 (s, 1H), 1.86 (s, 3H), 2.18-2.36 (m, 2H), 2.60-2.85 (m, 4H), 2.94-3.06 (m, 1H), 7.18-7.37 (m, 5H);  $^{13}\text{C}$  NMR (100 MHz,  $\text{CD}_3\text{CN}$ )  $\delta$  21.4, 24.0, 25.6, 26.8, 33.4, 33.6, 34.3, 37.6, 43.7, 46.2, 60.4, 126.7, 127.6, 128.4, 144.5, 210.7.

Compound **8a** in  $\text{DMSO-}d_6$ . (~3:1 mixture of ketone **8a** and hemiaminal **8ac**)  $^1\text{H}$  NMR (400 MHz,  $\text{DMSO-}d_6$ ) (diagnostic peaks)  $\delta$  0.34 (s, 9H), 1.41-1.52 (m, 2H), 1.84 (s, 3H), 2.06-2.14 (m, 1H), 2.93 (d,  $J = 12.4$  Hz, 1H);  $^{13}\text{C}$  NMR (100 MHz,  $\text{DMSO-}d_6$ )  $\delta$  20.8, 24.4, 26.6, 27.6, 31.8, 32.7, 34.5, 37.7, 43.5, 46.0, 60.3, 127.3, 127.7, 130.1, 144.2, 210.6. Hemiaminal **8ac**.  $^1\text{H}$  NMR (400 MHz,  $\text{DMSO-}d_6$ ) (diagnostic peaks)  $\delta$  0.82 (s, 9H), 3.15 (t,  $J = 13.0$  Hz, 1H), 3.67 (d,  $J = 12.6$  Hz, 1H), 5.26 (s, 1H), 7.68 (s, 1H);  $^{13}\text{C}$  NMR (100 MHz,  $\text{DMSO-}d_6$ ) (diagnostic peaks)  $\delta$  22.1, 28.5, 31.2, 42.7, 45.7, 49.4, 51.7, 59.8, 88.2, 125.4, 151.5.

### Additional Discussion Regarding IR Spectra

Leonard and coworkers have determined that infrared spectroscopy can be used effectively to detect transannular interactions between N and C<sub>CO</sub> in cyclic amino acyloins and amino ketones (Figure A).<sup>14-16</sup>

**Figure A.** *Infrared Spectroscopy in Detection of Transannular Interactions.*

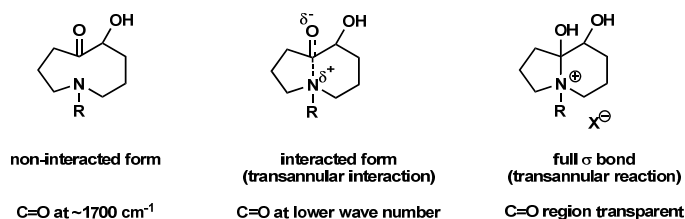

Accordingly, for cyclic amino ketones, in which the reactive moieties are not involved in a transannular interaction, the C=O absorption band appears at about 1700-1705  $\text{cm}^{-1}$ , as expected for a typical medium-sized cyclic ketone (Figure A, non-interacted form).

However, for cyclic amino ketones in which a transannular interaction takes place the C=O absorption band moves toward lower wave numbers, which is indicative of a decreased electron density at the carbonyl carbon (Figure A, interacted form).

Interestingly, for certain amino ketones, the infrared carbonyl region separates into two distinct bands, the one at higher wave number corresponding to a transannular non-interacted form, and the one at lower wave number corresponding to the transannular interacted form.<sup>14</sup>

Finally, when a full bonding between the amine and the carbonyl functionality is formed, the carbonyl region is fully transparent in the infrared spectrum (Figure A, full  $\sigma$  bond).

Thus, IR is a convenient method for determining a difference between a *transannular interaction* between the amine and carbonyl group ( $n_{\text{N}}$  electrons involved in homoconjugation with  $\pi^*_{\text{CO}}$  orbital, forming a partial bond between the reactive moieties), from a *transannular reaction* between the amine and carbonyl group (full  $\sigma$  bond between the reactive functionalities).

The following Table B summarizes the infrared characteristics of compounds **2a**, **8a-8d**, **9a-10c** formed upon addition of nucleophiles to one-carbon bridged twisted lactams. IR spectra of compounds **2a**, **8a**, **8c-d**, **9a-10c** are reproduced on pages 71-75.

**Table B.** Carbonyl Absorption of Selected Compounds Resulting from Nucleophilic Addition to Bridged Lactams.

| entry | compound                        | structure                                                                           | $\nu_{\text{C=O}}$ [cm <sup>-1</sup> ] |
|-------|---------------------------------|-------------------------------------------------------------------------------------|----------------------------------------|
| 1     | <b>2a</b>                       | 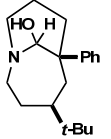   | -                                      |
| 2     | <b>8a</b> , R = Me              |    | 1701 (s)                               |
| 3     | <b>8b</b> , R = <i>n</i> -Bu    |                                                                                     | 1701 (s)                               |
| 4     | <b>8c</b> , R = <i>sec</i> -Bu  |                                                                                     | 1699 (s)                               |
| 5     | <b>8d</b> , R = <i>tert</i> -Bu |                                                                                     | 1680 (s)                               |
| 6     | <b>9a</b> , R = H               |    | -                                      |
| 7     | <b>10a</b> , R = <i>i</i> -Pr   |    | 1713 (vw), 1632 (w)                    |
| 8     | <b>9b</b> , R = H               |                                                                                     | 1653 (w)                               |
| 9     | <b>10b</b> , R = <i>i</i> -Pr   |   | 1705 (vw), 1633 (w)                    |
| 10    | <b>9c</b> , R = H               |                                                                                     | 1705 (s)                               |
| 11    | <b>10c</b> , R = <i>i</i> -Pr   |  | 1697 (s), 1626 (m)                     |

As expected, hemiaminal **2a** is characterized by a fully transparent carbonyl region in the infrared spectrum, indicating that a full  $\sigma$  bond between the amine and carbonyl present in this compound (Table B, entry 1).

By contrast, amino ketones **8a-8c** show maximum absorption at  $\sim 1700$  cm<sup>-1</sup>, a frequency typical for alkyl ketones (entries 2-4). This is indicative of an absence of the transannular interaction in these cases. However, amino ketone **8d** (entry 5) absorbs at significantly lower frequency than amino ketones **8a-8c**, which suggests the presence of a transannular interaction between the amine and the *tert*-butyl ketone in **8d** (compare this frequency with entries 10 and 11). It is possible that in the case of **8d** a steric interaction between the *tert*-butyl substituent placed on the nine-membered ring and the *tert*-butyl ketone favors the orientation of the reactive amine and ketone moieties on the same side of the medium-sized ring.

Next, more substituted but contained in a tricyclic scaffold hemiaminal **9a** (entry 6) is fully transparent in the carbonyl absorption region in the infrared spectrum, in a fashion similar to hemiaminal **2a** (entry 1).

Very interestingly, however, in the case of hemiaminal **10a** (entry 7) two weak absorption bands are visible in the carbonyl region in the infrared spectrum. We ascribe these bands to the presence of the transannular non-interacted species (characterized by absorption at 1713 cm<sup>-1</sup>) and the transannular interacted species (characterized by absorption at 1632 cm<sup>-1</sup>). These species are likely in equilibrium with the fully-closed hemiaminal form. As judged from <sup>13</sup>C NMR and from the relative intensities of the



absorption bands in the IR spectrum the fully-closed hemiaminal form seems to be the major species present in this equilibrium.

The carbonyl absorption bands corresponding to hemiaminals **9b** and **10b** (entries 8 and 9) mirror the IR spectrum of hemiaminal **10a** (entry 7). As expected, the bands corresponding to the hemiaminal **10b**, which is substituted with a sterically demanding *i*-propyl substituent near the hemiaminal carbon (entry 9), are more intense than the carbonyl absorption bands corresponding to hemiaminal **9a** (entry 8, compare with the tendency in entries 2-5).

Finally, although the unsubstituted **9c** (entry 10) shows only one maximum in the carbonyl region clearly corresponding to the non-interacted amino ketone (compare with entry 2), the carbonyl frequency of the *i*-Pr substituted **10c** (entry 11) reveals a tendency towards equilibrium of the non-interacted amino ketone with the species participating in a transannular interaction (as evidenced by a lower frequency of the ketone absorption band at 1697 cm<sup>-1</sup> and the appearance of a weak band at 1632 cm<sup>-1</sup>).

We also recorded IR spectrum of **8a** in solution (CDCl<sub>3</sub>). In agreement with the previous observations, the carbonyl absorption maximum was shifted towards lower wave numbers (1697 cm<sup>-1</sup> in CDCl<sub>3</sub> vs. 1701 cm<sup>-1</sup> when spectrum was recorded as a film), however this difference was smaller than in the above examples and could also arise from experimental errors.

Overall, these results clearly demonstrate a potential one-carbon bridged lactams to monitor the transition from stable tetrahedral intermediates to N<sup>⋯</sup>C=O interactions to unstable tetrahedral intermediates. We are currently investigating this point in more detail.

## Reactions with Additional Nucleophiles

Scheme G. Synthesis of compounds 15-18.

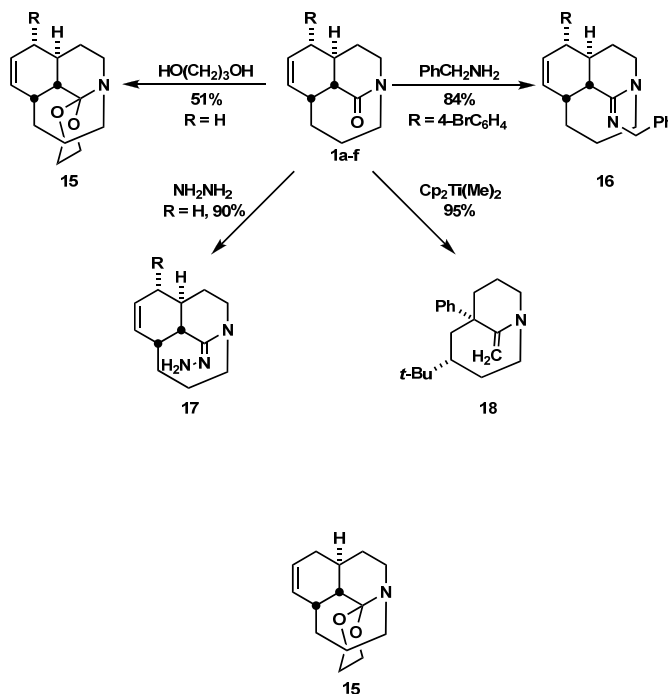

**Aminoketal 15.** To a mixture of 1,3-pentanediol (0.19 g, 2.5 mmol) and *p*-TsOH (2 mg, 0.06 mmol) in benzene was added bridged lactam **1e** (0.030 g, 0.16 mmol) at room temperature, and the reaction mixture was allowed to reflux for 3 days. The reaction mixture was partitioned between water and EtOAc, the organic layer was washed with saturated  $\text{NaHCO}_3$  and brine, dried with  $\text{Na}_2\text{SO}_4$ , filtered, and concentrated. Chromatography (60% EtOAc/hexanes) afforded the title compound as oil. Yield 51% (0.020 g, 0.08 mmol).  $^1\text{H}$  NMR (400 MHz,  $\text{CDCl}_3$ )  $\delta$  1.37-1.45 (m, 3H), 1.60-1.67 (m, 3H), 1.80-1.84 (m, 2H), 1.96-2.11 (m, 5H), 2.62-2.75 (m, 3H), 2.99-3.11 (m, 1H), 3.27-3.31 (m, 1H), 3.71-3.73 (m, 2H), 4.10-4.33 (m, 2H), 5.65-5.70 (complex, 2H);  $^{13}\text{C}$  NMR (100 MHz,  $\text{CDCl}_3$ )  $\delta$  24.5, 24.9, 26.9, 32.3, 32.7, 34.0, 34.1, 49.6, 52.5, 53.0, 59.1, 59.7, 105.1, 126.8, 134.7; IR (neat) 2957, 1085  $\text{cm}^{-1}$ ; HRMS calcd for  $\text{C}_{15}\text{H}_{24}\text{NO}_2$  ( $\text{M}^{\dagger}+1$ ) 250.1802, found 250.1798. Note: attempted ketalization of bicyclic lactam **1b** and **1l** under identical reaction conditions did not afford the desired products (only starting materials were observed by NMR).

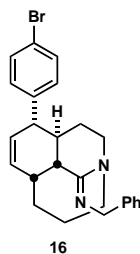

**Bridged imine 16.** Lactam **1f** (0.0100 g, 0.029 mmol, 1.0 equiv), benzylamine (0.063 mL, 0.058 mmol, 20.0 equiv) and *p*TsOH (1 crystal) were heated in toluene (20 mL) under Dean-Stark trap for 23 h. Solvent removal and chromatography (2/1 EtOAc/hexanes) afforded the title compound as oil ( $R_f = 0.44$ , 1/1 EtOAc/hexanes). Yield 84% (0.0106 g, 0.024 mmol). The compound was obtained as a single imine isomer. Geometry was determined by HSQC, HMBC and NOESY correlations.  $^1\text{H}$  NMR (400 MHz,  $\text{CDCl}_3$ )  $\delta$  1.25-1.72 (m, 5H), 1.86 (q,  $J = 11.0$  Hz, 1H), 2.06-2.15 (m, 1H), 2.48-2.62 (m, 2H), 2.70-2.80 (m, 1H), 2.91 (dd,  $J = 4.4, 10.8$  Hz, 1H), 3.17 (d,  $J = 10.8$  Hz, 1H), 3.45 (dd,  $J = 6.1, 11.8$  Hz, 1H), 3.54 (dt,  $J = 3.2, 11.9$ , 1H), 4.29 (d,  $J = 14.6$  Hz, 1H), 4.87 (d,  $J = 14.5$  Hz, 1H), 5.56 (d,  $J = 9.8$  Hz, 1H), 5.90-5.97 (m, 1H), 7.05 (d,  $J = 8.3$  Hz, 2H), 7.19-7.36 (m, 5H), 7.45 (d,  $J = 8.3$  Hz, 2H);  $^{13}\text{C}$  NMR (100 MHz,  $\text{CDCl}_3$ )  $\delta$  24.9, 26.0, 33.8, 39.4, 40.6, 49.6, 53.3, 53.7, 55.8, 56.2, 120.2, 126.4, 128.1, 128.3, 129.8, 130.7, 131.5, 134.0, 140.8, 142.6, 165.8; IR (neat) 3021, 2922, 2855, 1655, 1487, 1451, 1405, 1073  $\text{cm}^{-1}$ ; HRMS calcd for  $\text{C}_{25}\text{H}_{28}\text{BrN}_2$  ( $\text{M}^+ + \text{H}$ ) 435.1436, found 435.1410. Note: the reaction of bicyclic amide **1a** under similar conditions did not afford the desired imine (only starting material was observed by NMR). Under more forcing conditions only decomposition of the starting material was observed.

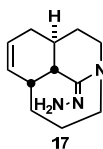

**Aminohydrazone 17.** Lactam **1e** (0.050 g, 0.26 mmol) was dissolved in methylene glycol, treated with hydrazine (0.084 g, 2.6 mmol), and the reaction mixture was heated to 100 °C for 20 h. The reaction was cooled to rt, KOH (0.031 g, 0.55 mmol) was added and heating was continued for 2 h at 195 °C. The reaction was cooled to rt, partitioned between water and  $\text{CHCl}_3$ , the organic layer was washed with saturated  $\text{NaHCO}_3$  and brine, dried with  $\text{Na}_2\text{SO}_4$ , filtered, and concentrated. Chromatography (10/90 MeOH/ $\text{CH}_2\text{Cl}_2$ ) afforded the title product as an oil. Mixture of isomers. Yield 90%.  $^1\text{H}$  NMR (400 MHz,  $\text{CDCl}_3$ )  $\delta$  1.15-1.80 (complex, 11H), 1.96-1.99 (m, 1H), 2.23-2.27 (m, 1H), 2.50-2.62 (m, 1H), 2.77-2.83 (m, 1H), 3.21-3.25 (m, 0.7H), 3.38-3.39 (m, 0.4H), 3.49-3.52 (m, 1H), 5.48-5.57 (complex, 2H);  $^{13}\text{C}$  NMR (100 MHz,  $\text{CDCl}_3$ ) (major isomer)  $\delta$  26.6, 28.5, 30.8, 32.2, 32.9, 40.0, 53.9, 54.2, 57.7, 127.1, 133.4, 152.8; (minor isomer)  $\delta$  26.0, 27.7, 30.7, 33.5, 34.4, 41.3, 50.8, 55.4, 57.3, 151.2. IR (neat) 3371, 1627  $\text{cm}^{-1}$ ; HRMS calcd for  $\text{C}_{12}\text{H}_{20}\text{N}_3$  ( $\text{M}^+ + 1$ ) 206.1657, found 206.1662.

Note: This particular reaction was also performed to allow comparison of one-carbon bridged lactams with an adamantane-type bridged amide reported by Coe and

coworkers (Scheme H).<sup>17</sup> Interestingly, although in the latter case a subsequent full reduction to the corresponding amine was carried out, we were unable to reduce **17** under Wolff-Kishner conditions.

**Scheme H.** Reduction of Adamantane-type Twisted Amide under Wolff-Kishner Conditions.<sup>14</sup>

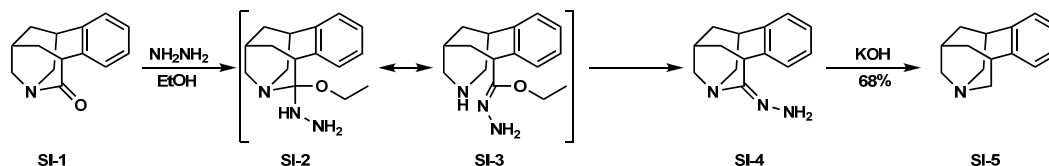

Coe and coworkers have observed by APCI MS analysis that in the course of the reaction the mixed ethanol-aminohydrazone intermediate **SI-2** is formed, which probably exists in equilibrium with the open amino-hydrazone **SI-3**.<sup>17</sup> It is possible that in the case of one-carbon bridged lactam **1e** a similar ring opening occurs, with the closure being facilitated by inside-outside isomerism exhibited by the open amino-hydrazone form of the lactam **1e**.<sup>18</sup> It should be noted that **SI-1** represents one of the very few examples of reactive and stable to alcoholic conditions twisted amides.<sup>19</sup>

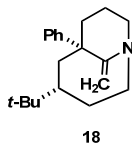

**(4R,6R)-4-tert-Butyl-10-methylene-6-phenyl-1-azabicyclo[4.3.1]decane (18).**

25 mL round bottom flask was charged with amide **1a** (0.0214 g, 0.75 mmol, 1.0 equiv), toluene (6.0 mL), pyridine (0.06 mL) and Petasis reagent<sup>20</sup> (0.58 M in toluene, 0.65 mL, 0.38 mmol, 5.0 equiv), sealed with septum, and the resulting reaction mixture was heated at 105 °C for 10 h. The reaction was cooled to rt, diluted with Et<sub>2</sub>O (5 mL) and hexanes (5 mL), stirred for 10 min, and filtered through a short plug of celite (eluting with Et<sub>2</sub>O). Chromatography (1/4 EtOAc/hexanes) afforded the title compound as oil (*R<sub>f</sub>* = 0.21, 1/4 EtOAc/hexanes). Yield 95% (0.0201 g, 0.071 mmol). <sup>1</sup>H NMR (400 MHz, CDCl<sub>3</sub>) δ 0.99 (s, 9H), 1.57-1.81 (m, 6H), 1.86-1.98 (m, 1H), 2.07-2.19 (m, 1H), 2.30 (d, *J* = 9.9 Hz, 1H), 2.59-2.71 (m, 1H), 2.99-3.09 (m, 1H), 3.39-3.48 (m, 1H), 3.52-3.59 (m, 1H), 4.19 (s, 1H), 4.76 (s, 1H), 7.20 (tt, *J* = 1.1, 6.7 Hz, 1H), 7.29-7.36 (m, 2H), 7.46-7.53 (m, 2H); <sup>13</sup>C NMR (100 MHz, CDCl<sub>3</sub>) δ 22.2, 27.8, 28.1, 34.0, 39.9, 43.9, 45.0, 47.0, 54.6, 55.4, 110.6, 125.6, 127.2, 127.7, 151.7, 157.0; IR (neat) 3088, 3055, 3028, 2943, 2866, 1628, 1555, 1443, 1393, 1366, 1101, 866, 762 cm<sup>-1</sup>; HRMS calcd for C<sub>20</sub>H<sub>30</sub>N (M<sup>+</sup> + H) 284.2378, found 284.2375.

**Scheme I.** Attempted Wittig Olefinations of One-carbon Bridged Lactams.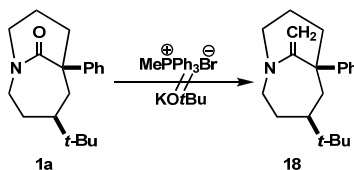

*Attempted Wittig Olefination of Amide 1a.* According to the procedure by Fitjer for demanding olefinations.<sup>21</sup> To a solution of triphenyl methyl triphenylphosphonium bromide (0.256 g, 0.70 mmol, 10.0 equiv) in toluene (5 mL)  $\text{KOtBu}$  (0.089 g, 0.70 mmol, 10.0 equiv) was added and the resulting mixture was heated at 105 °C for 1 h. The reaction was cooled to rt, amide **1a** (0.0200 g, 0.070 mmol, 1.0 equiv) in toluene (2 mL) was added, and the reaction was heated at 105 °C for 24 h. The reaction was quenched with water (5 mL), extracted with ether (3 x 20 mL), washed with water (1 x 10 mL), brine (1 x 10 mL), dried and concentrated. Analysis of the crude reaction mixture by NMR indicated only the presence of the starting material. Enamine **18** was not present in the reaction mixture. Similarly, the reaction of amide **1e** with triphenyl methyl triphenylphosphonium bromide (10.0 equiv) and  $\text{KOtBu}$  (10.0 equiv) for 22 h at 105 °C did not afford the bridged enamine. In addition, the reaction of amide **1f** with 3.0 equiv of triphenylphosphonium methylide (generated from methyl triphenylphosphonium bromide and  $n\text{BuLi}$ ) in refluxing THF for 24 h did not afford the desired product.<sup>22</sup> Analysis of the crude reaction mixtures indicated only the presence of the starting materials.

## References

1. Yao, L.; Aubé, J. *J. Am. Chem. Soc.*, **2007**, *129*, 2766-2767.
2. Yao, L.; Wroblewski, A. D.; Golden, J. E.; Powell, D. R.; Aubé, J. *J. Am. Chem. Soc.*, **2005**, *127*, 4552-4553.
3. Szostak, M.; Yao, L.; Aubé, J. *Org. Lett.*, **2009**, *11*, 4386-4389.
4. Szostak, M.; Yao, L.; Aubé, J. *J. Org. Chem.*, **2010**, *in press*.
5. Hudlicky, M., *Reductions in Organic Chemistry*. American Chemical Society: 1996.
6. Brown, H. C.; Rao, B. C. S. *J. Am. Chem. Soc.* **1955**, *77*, 3164-3164.
7. Brown, H. C.; Mead, E. J.; Rao, B. C. S. *J. Am. Chem. Soc.* **1955**, *77*, 6209-6213.
8. Gemal, A. L.; Luche, J. L. *J. Am. Chem. Soc.* **1981**, *103*, 5454-5459.
9. Brown, H. C.; McFarlin, R. F. *J. Am. Chem. Soc.* **1958**, *80*, 5372-5376.
10. Brown, H. C.; Krishnam, S. *J. Am. Chem. Soc.* **1972**, *94*, 7159-7161.
11. Brown, H. C.; Weissman, P. M.; Yoon, N. M. *J. Am. Chem. Soc.* **1966**, *88*, 1458-1463.
12. Yoon, N. M.; Gyoung, Y. S. *J. Org. Chem.* **1985**, *50*, 2443-2450.
13. Brown, H. C.; Kim, S. C.; Krishnamurthy, S. *J. Org. Chem.* **1980**, *45*, 1-12.
14. Leonard, N. J.; Oki, M.; Brader, J.; Boaz, H. *J. Am. Chem. Soc.* **1955**, *77*, 6237-6239, and other papers in the series.
15. Leonard, N. J. *Acc. Chem. Res.* **1979**, *12*, 423-429.
16. For another example, see: Bell, M. R.; Archer, S. *J. Am. Chem. Soc.* **1960**, *82*, 151-155.
17. Bashore, C. G.; Samardjiev, I. J.; Bordner, J.; Coe, J. W. *J. Am. Chem. Soc.*, **2003**, *125*, 3268-72.
18. Szostak, M.; Yao, L.; Aubé, J. *J. Org. Chem.*, **2009**, *74*, 1869-1875.
19. Compare with: Ye, Q.; Komarov, I. V.; Kirby, A. J.; Jones, M. *J. Org. Chem.* **2002**, *67*, 9288-9294.
20. Dollinger, L. M.; Ndakala, A. J.; Hashemzadeh, M.; Wang, G.; Wang, Y.; Martinez, I.; Arcari, J. T.; Galluzzo, D. J.; Howell, A. R.; Rheingold, A. L.; Figueroa, J. S. *J. Org. Chem.* **1999**, *64*, 7074-7080.
21. Fitjer, L.; Quabeck, U. *Synth. Comm.*, **1985**, *15*, 855-864.
22. Compare with: Kirby, A. J.; Komarov, I. V.; Feeder, N. *J. Chem. Soc., Perkin Trans. 2* **2001**, 522-529.

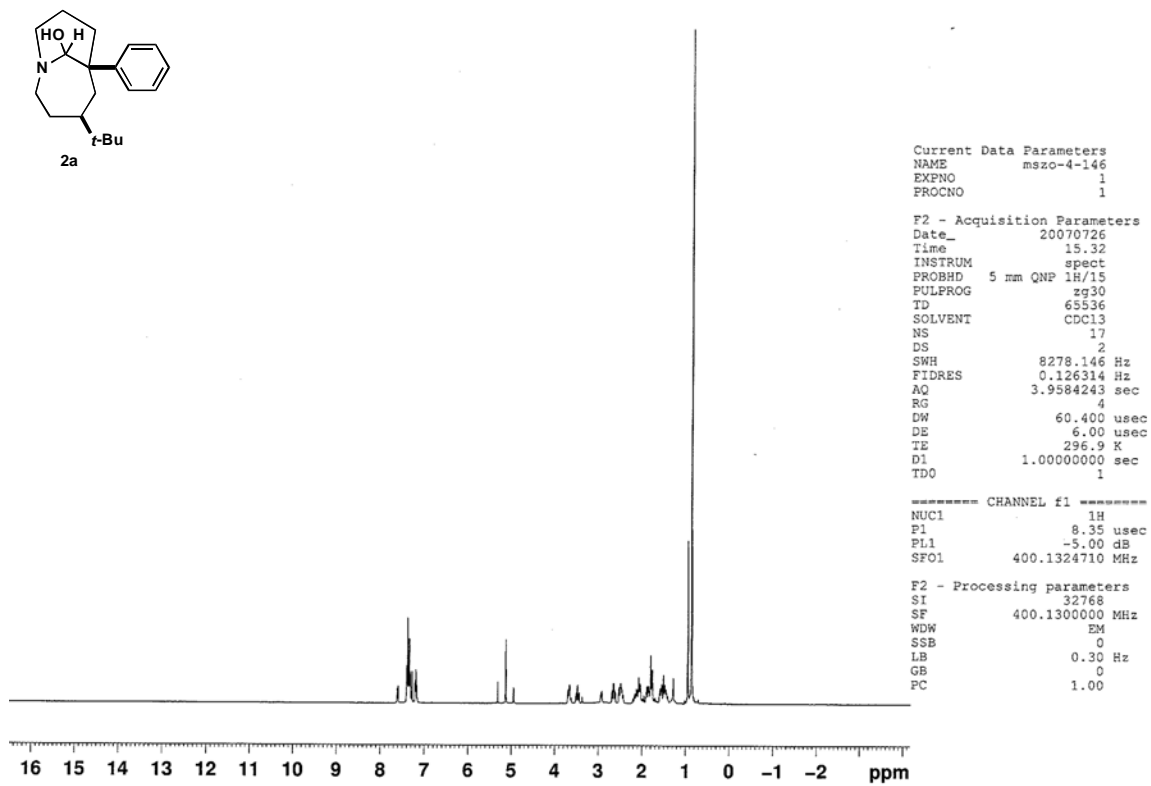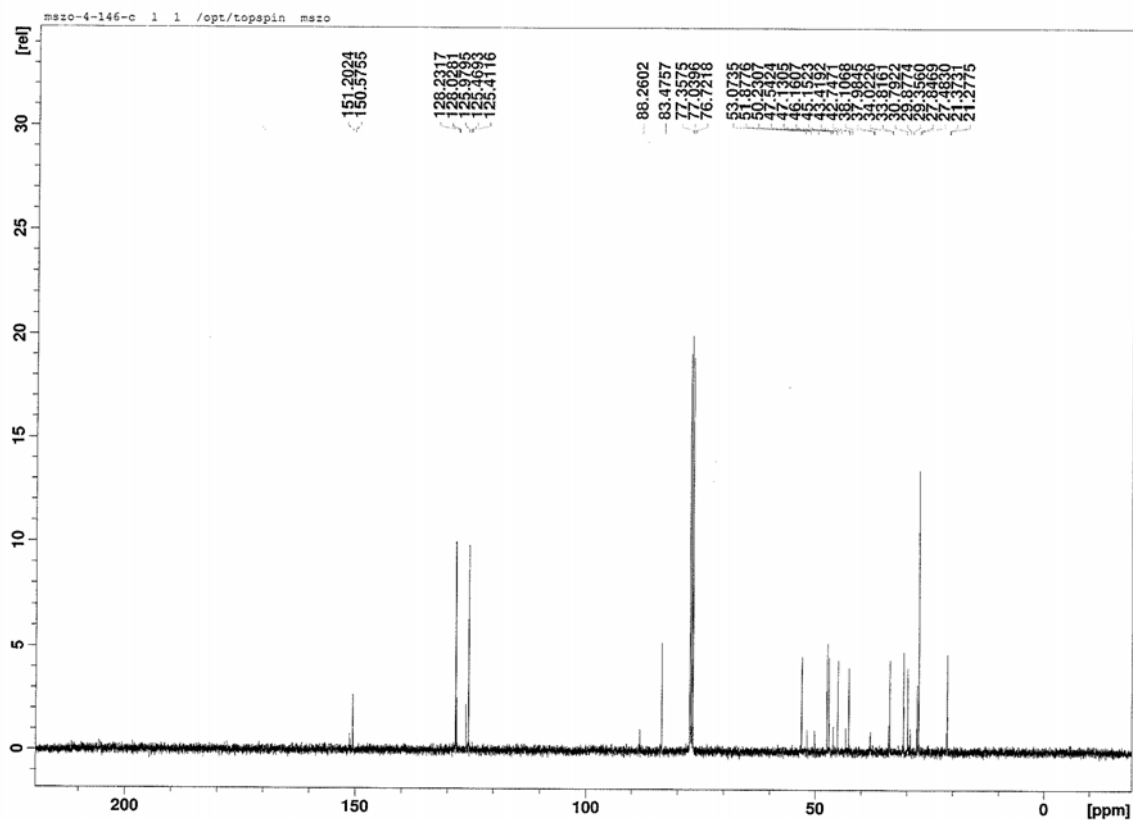

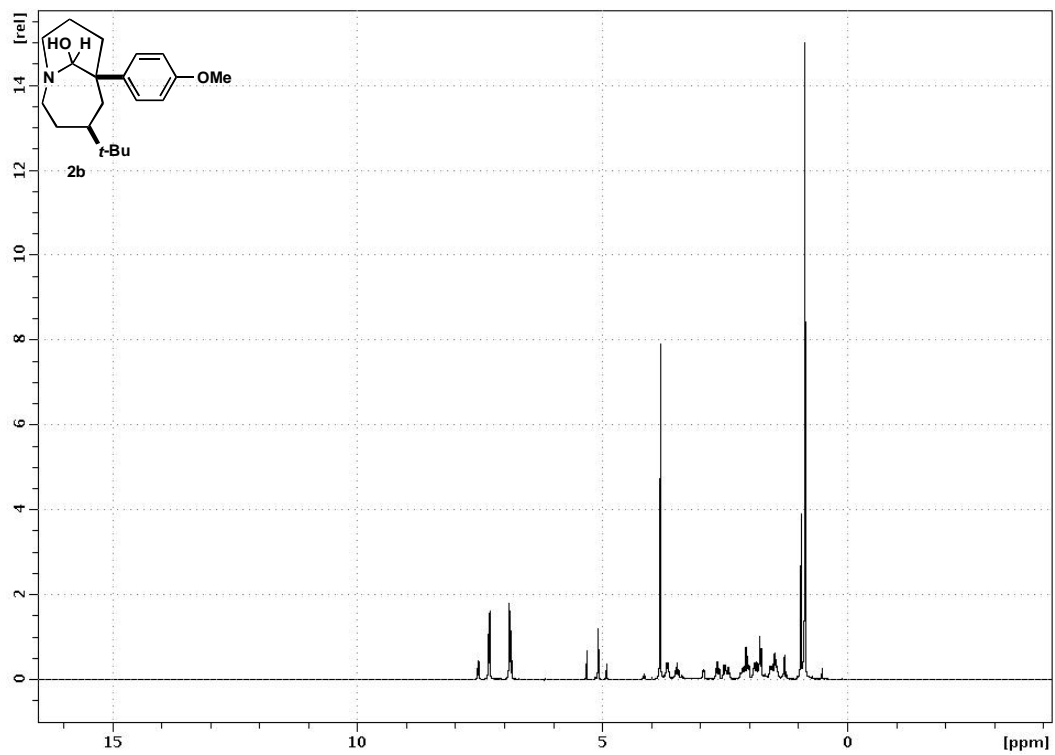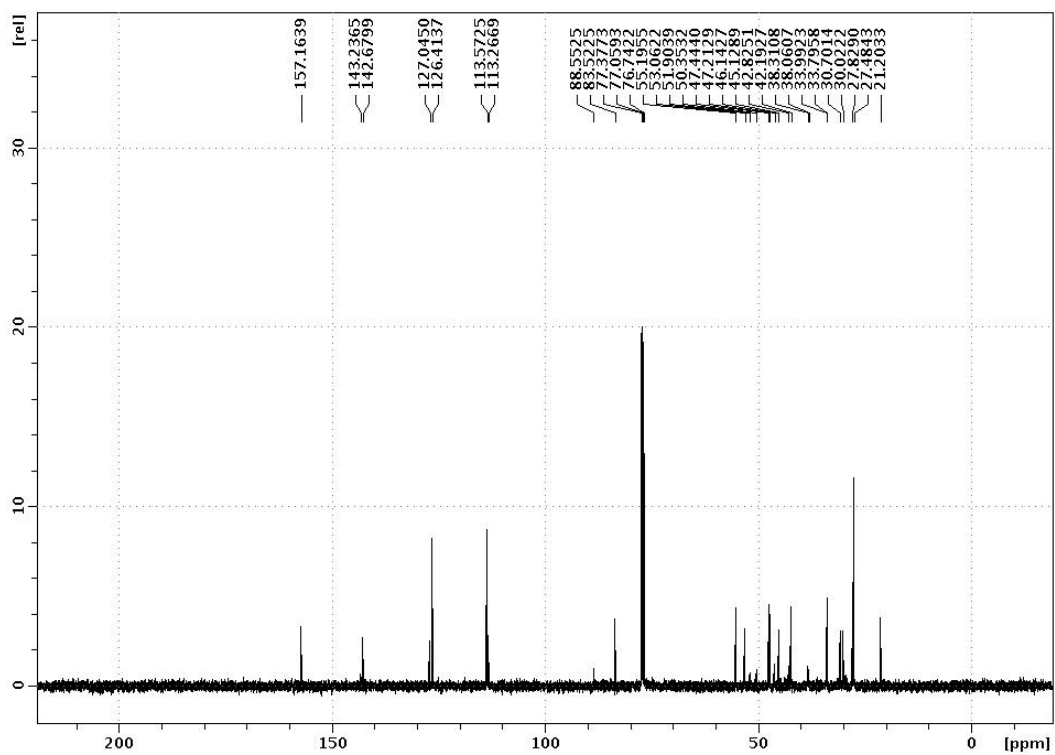



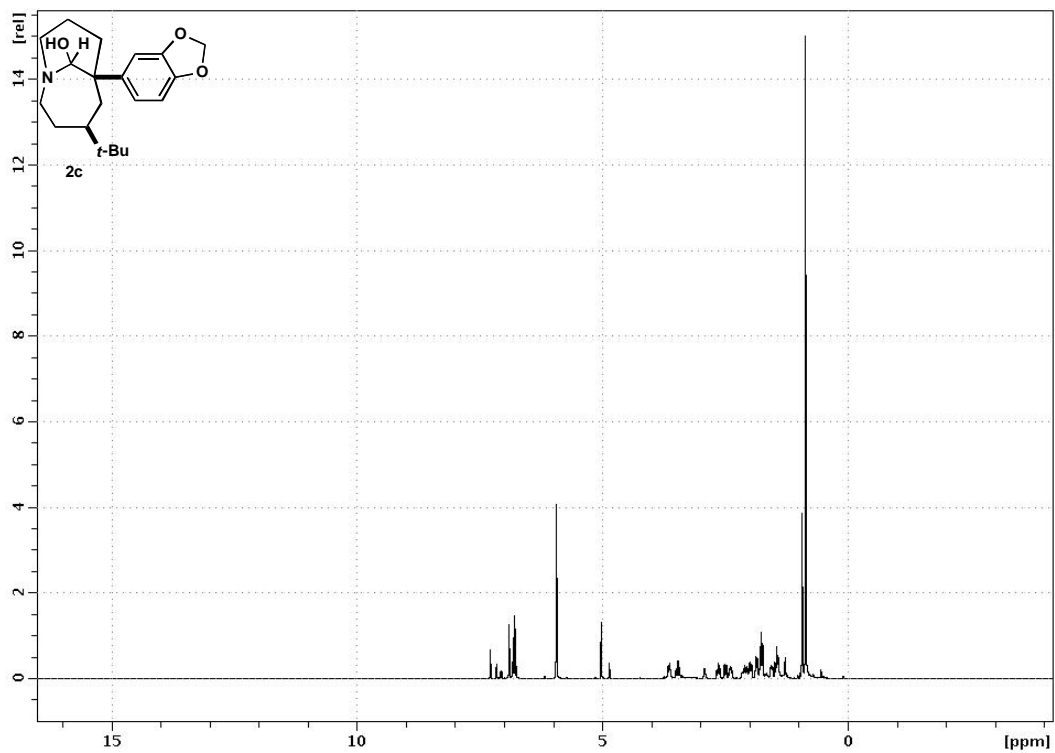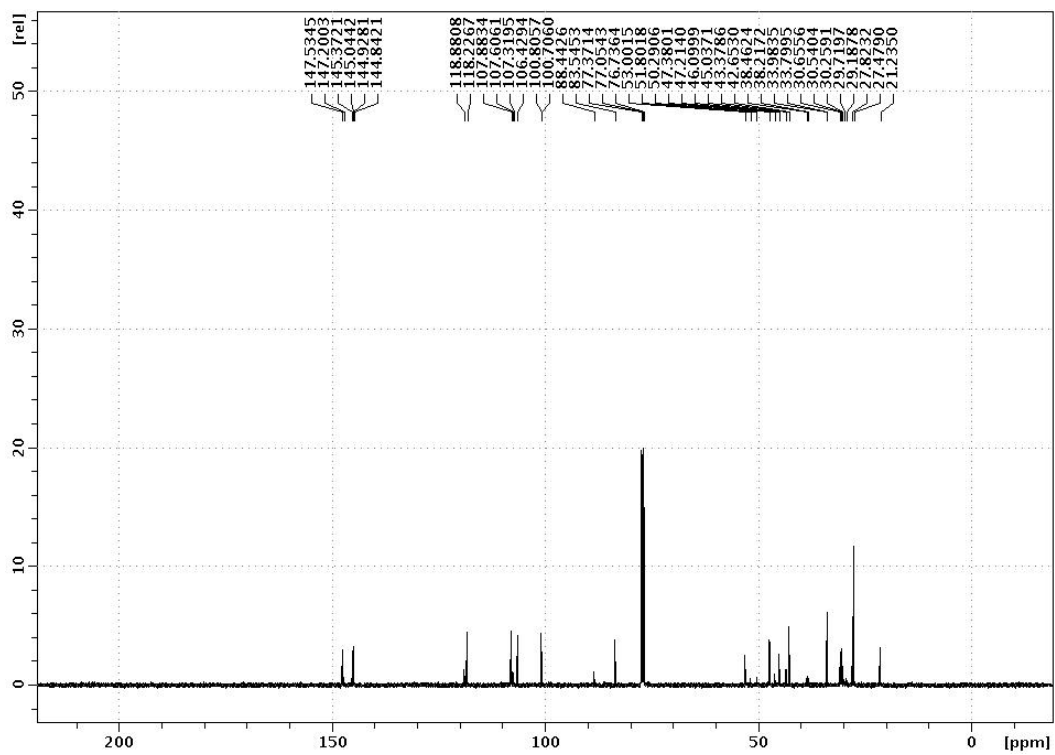

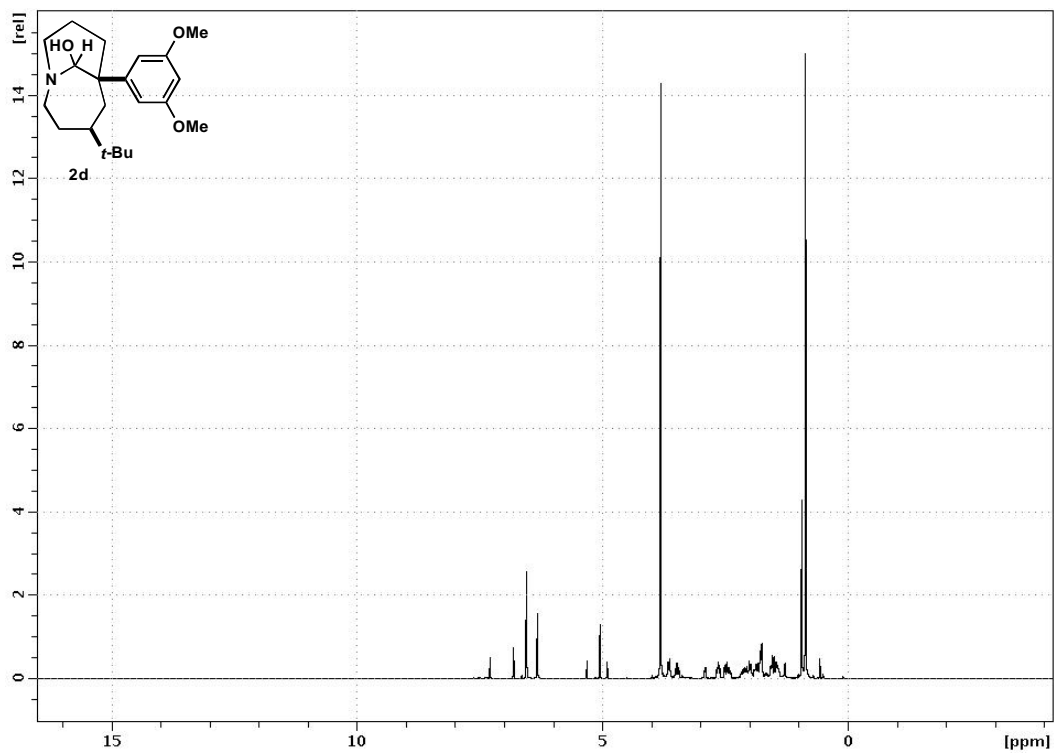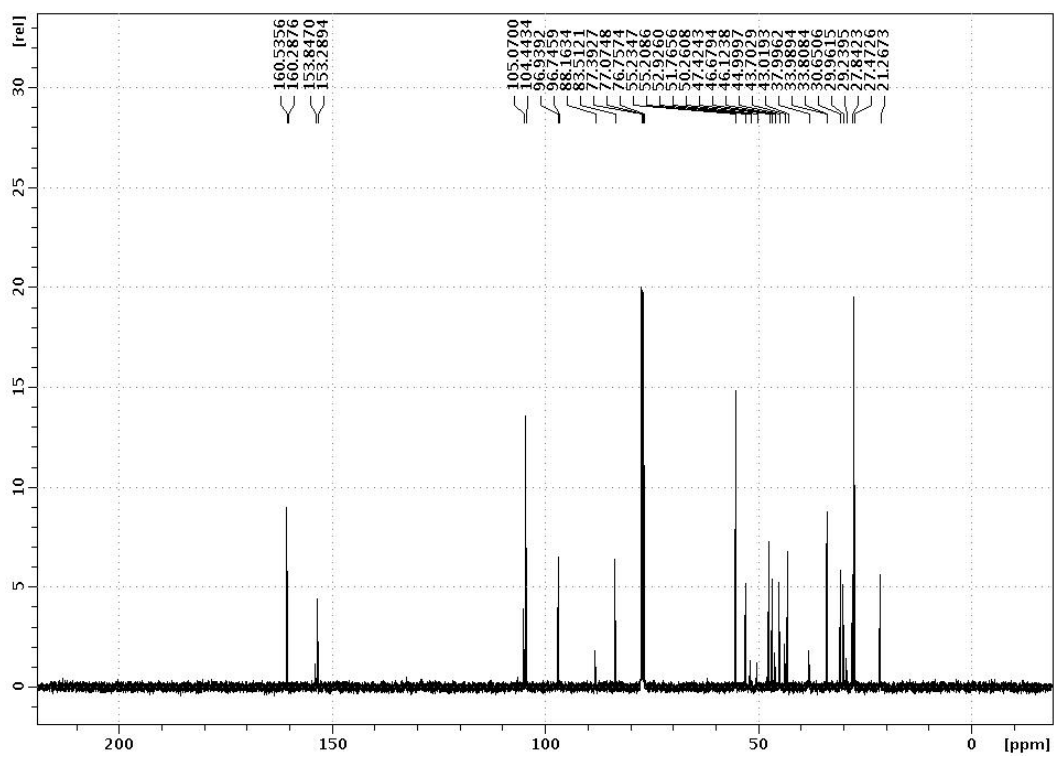

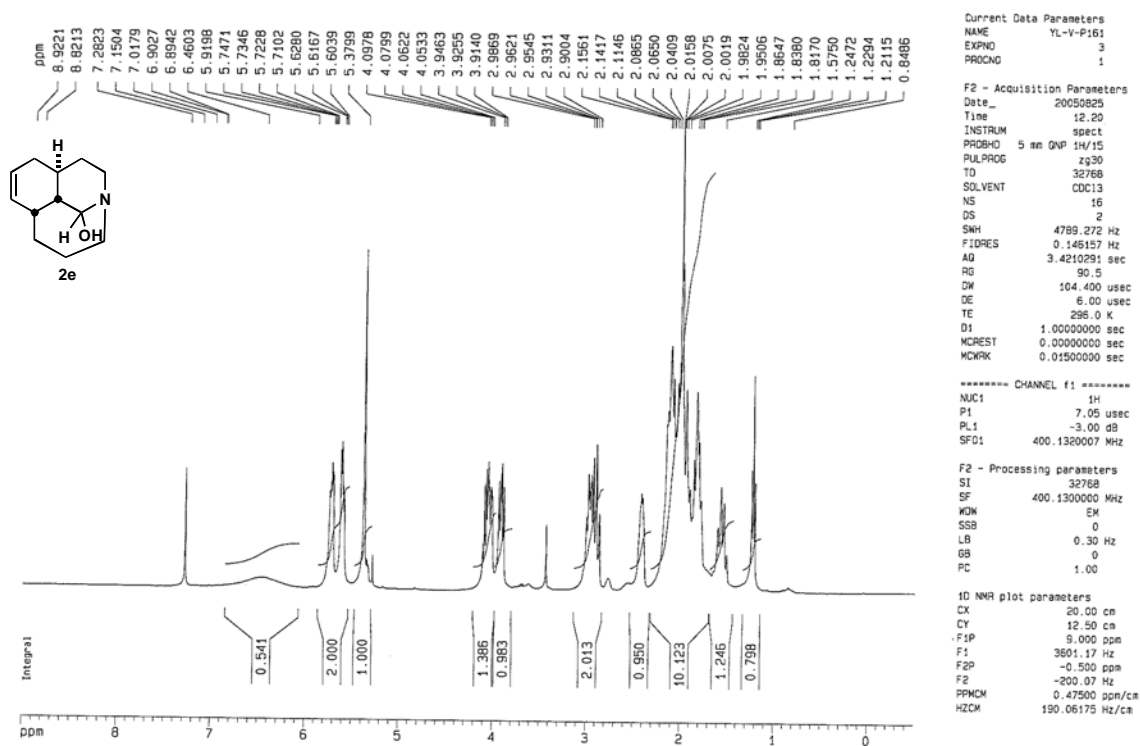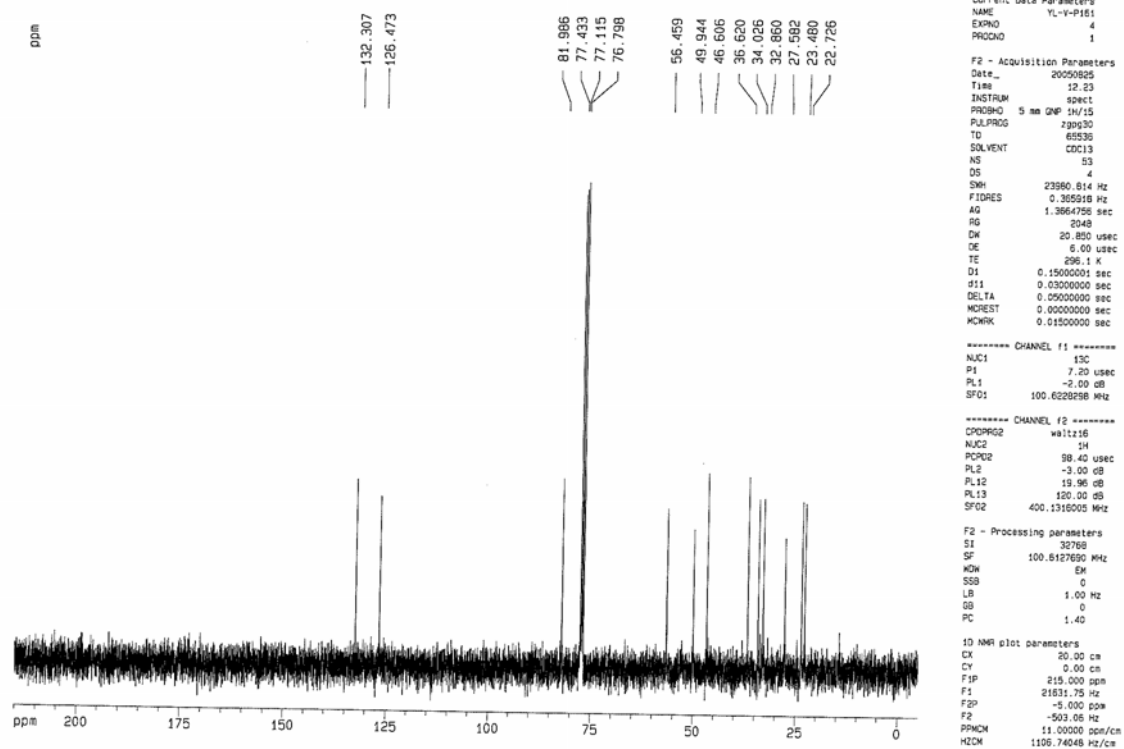

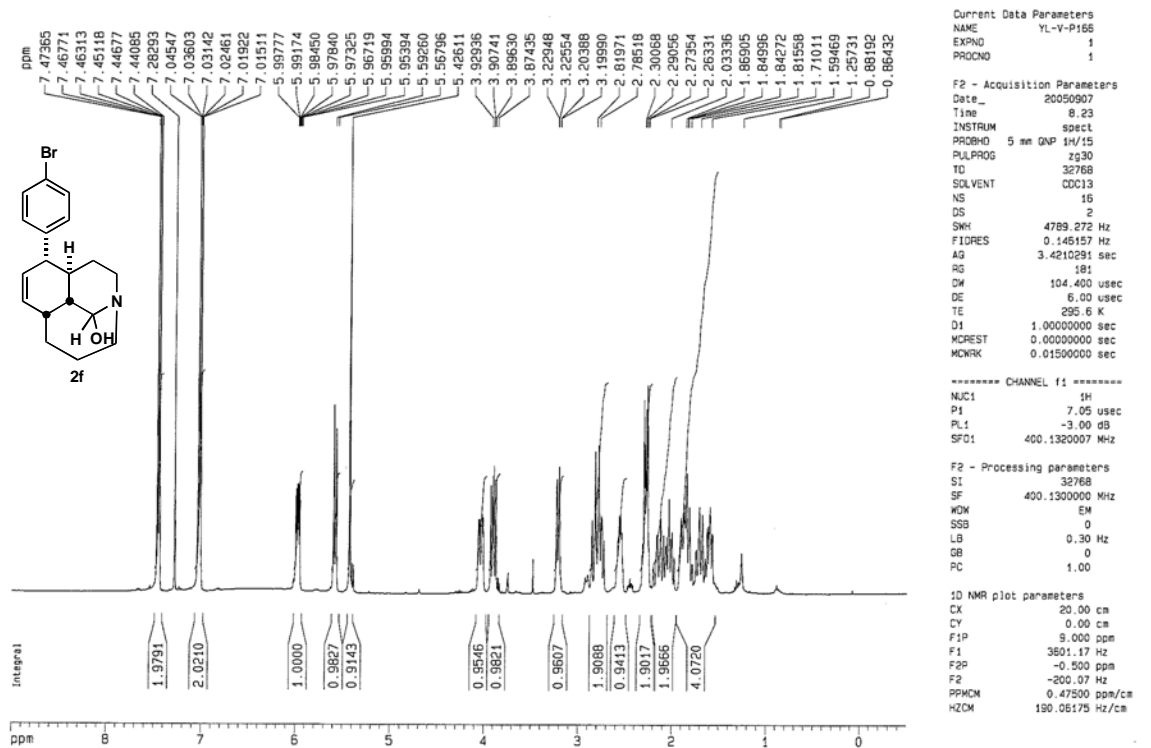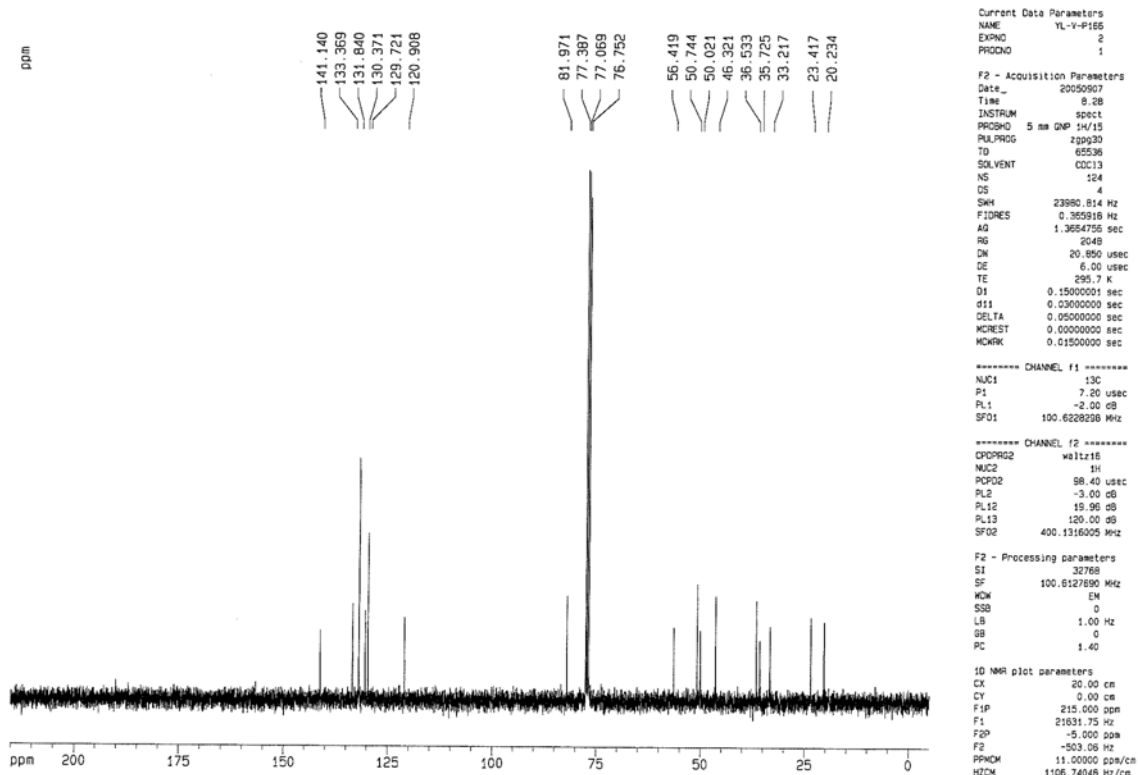

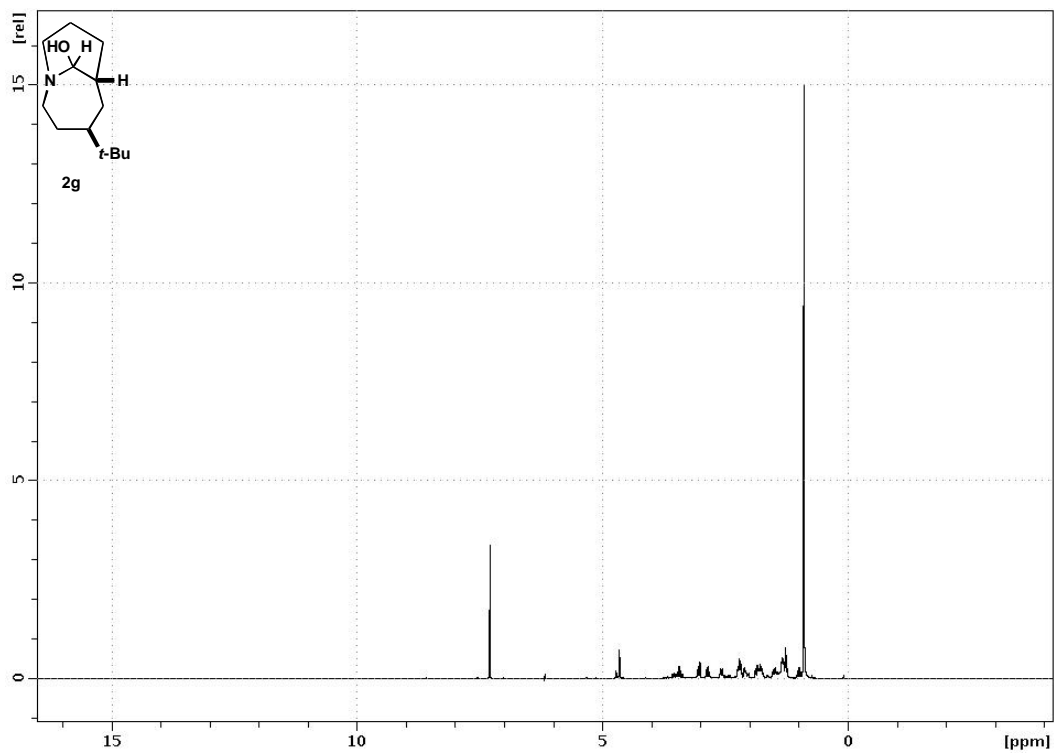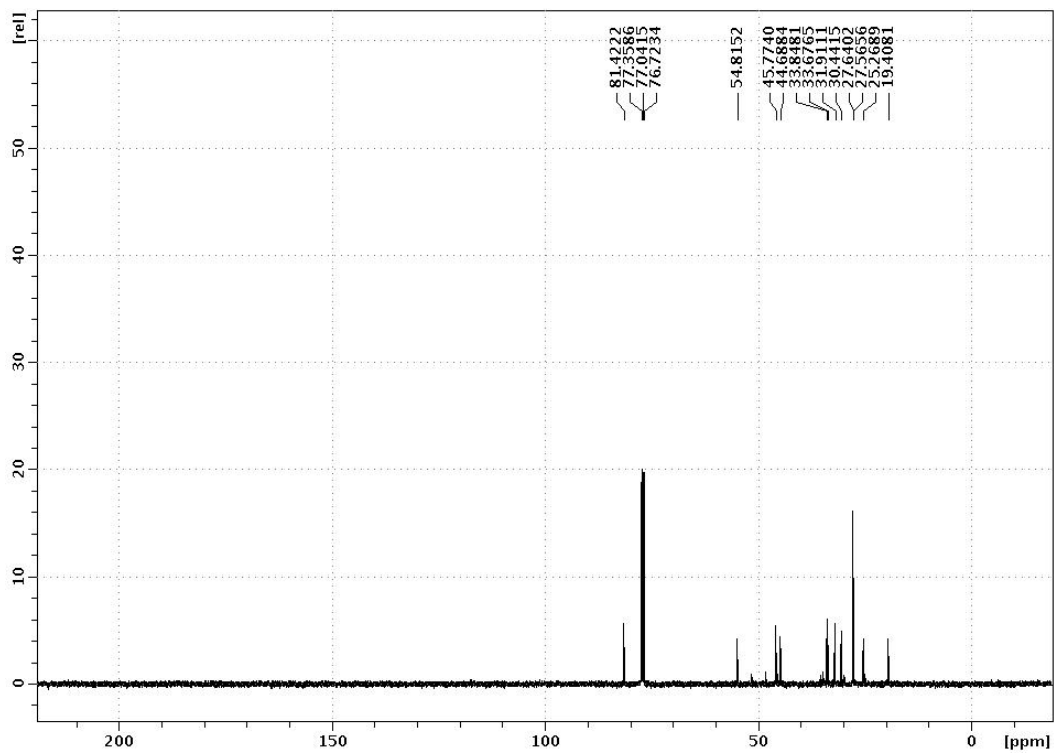

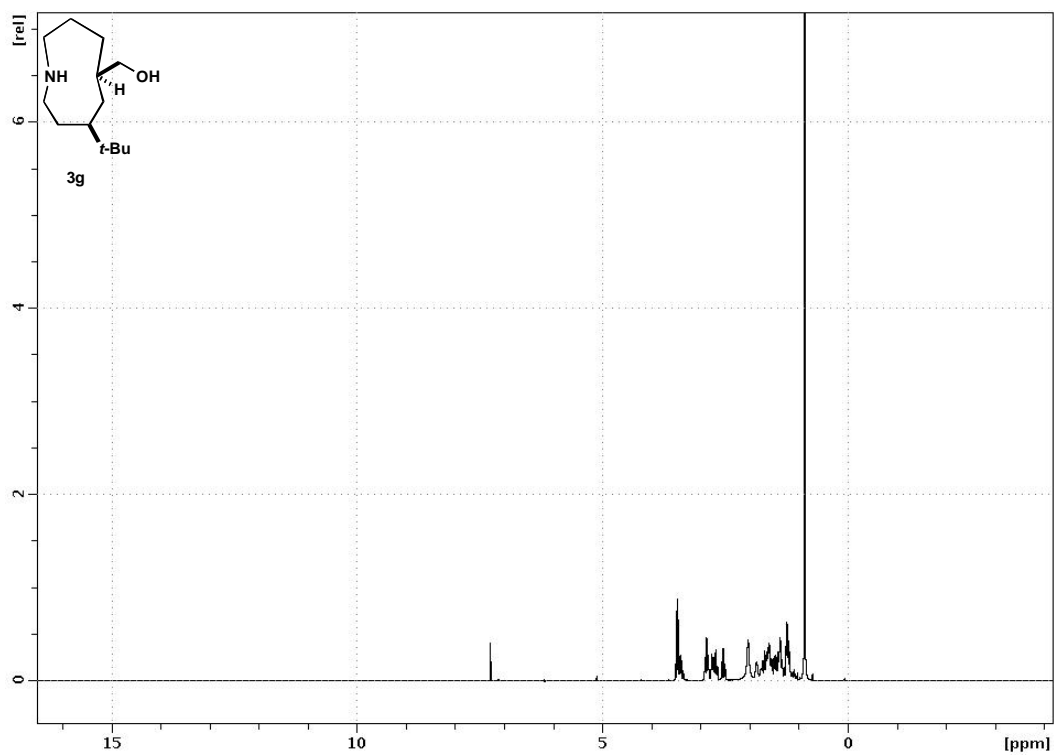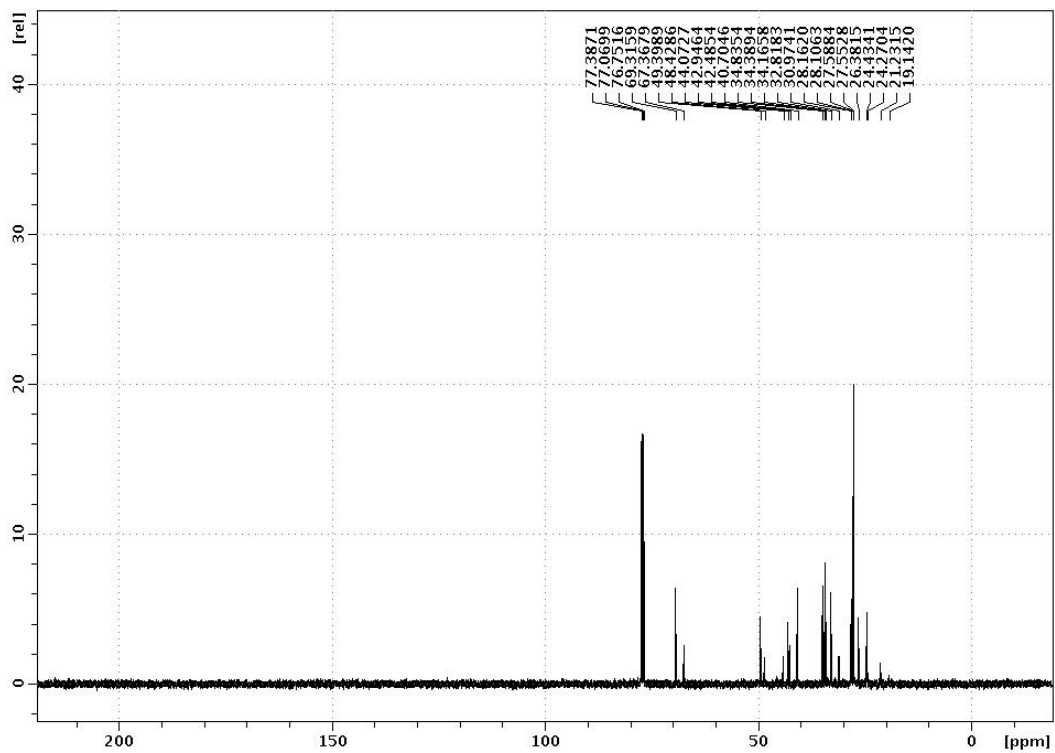

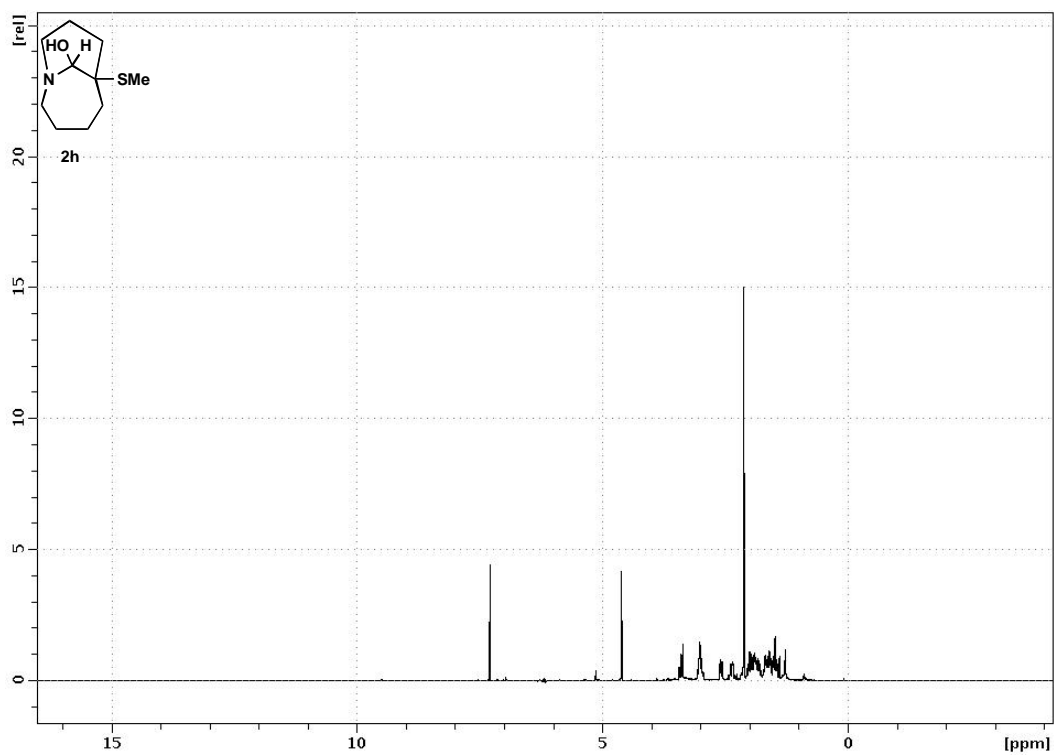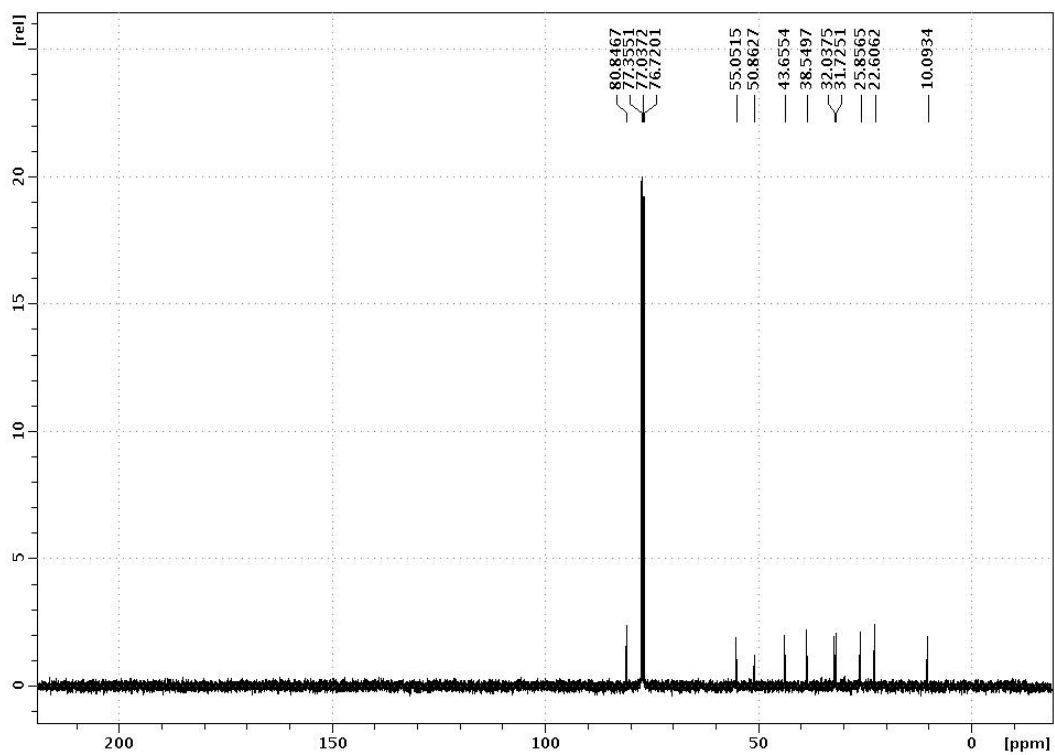

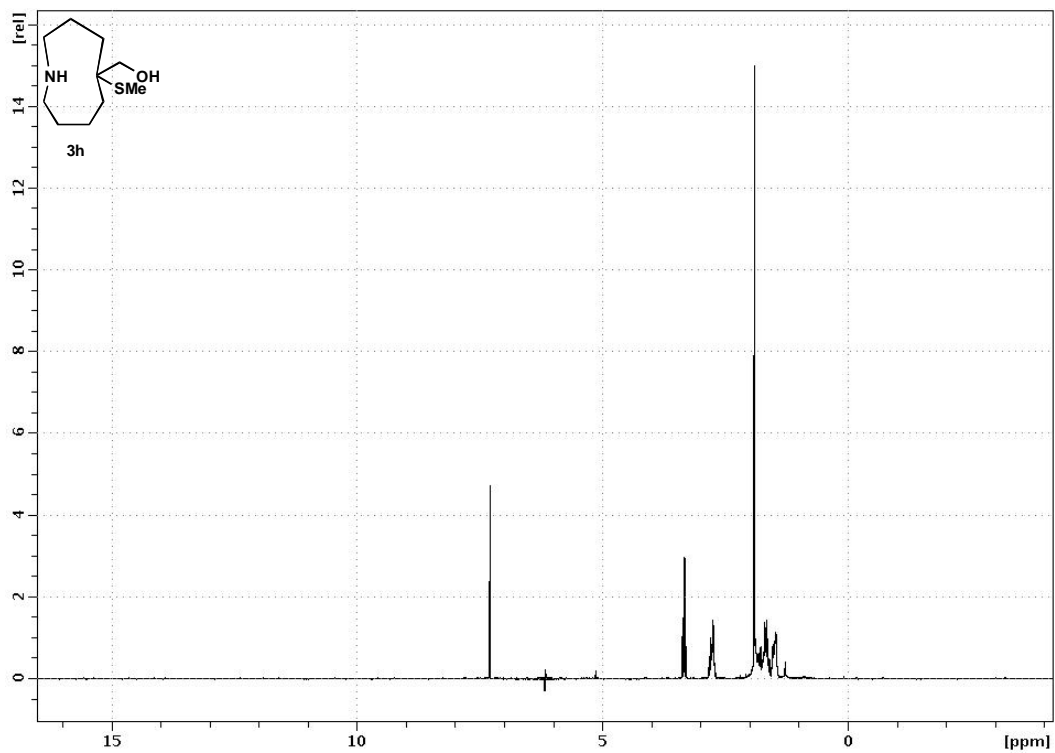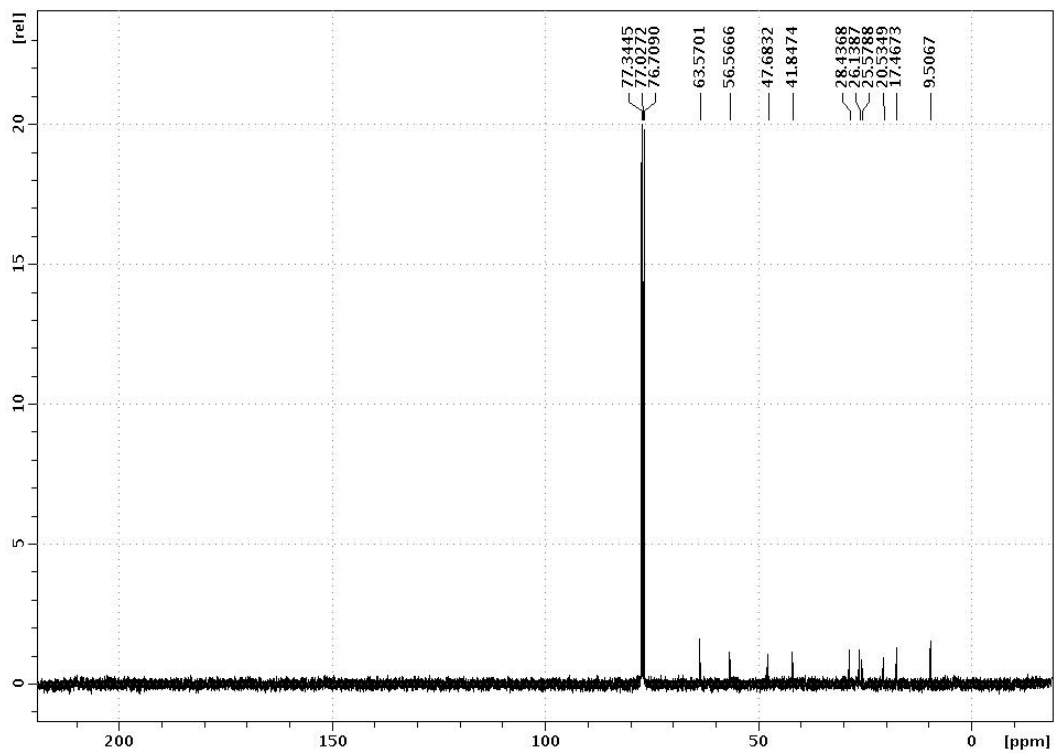



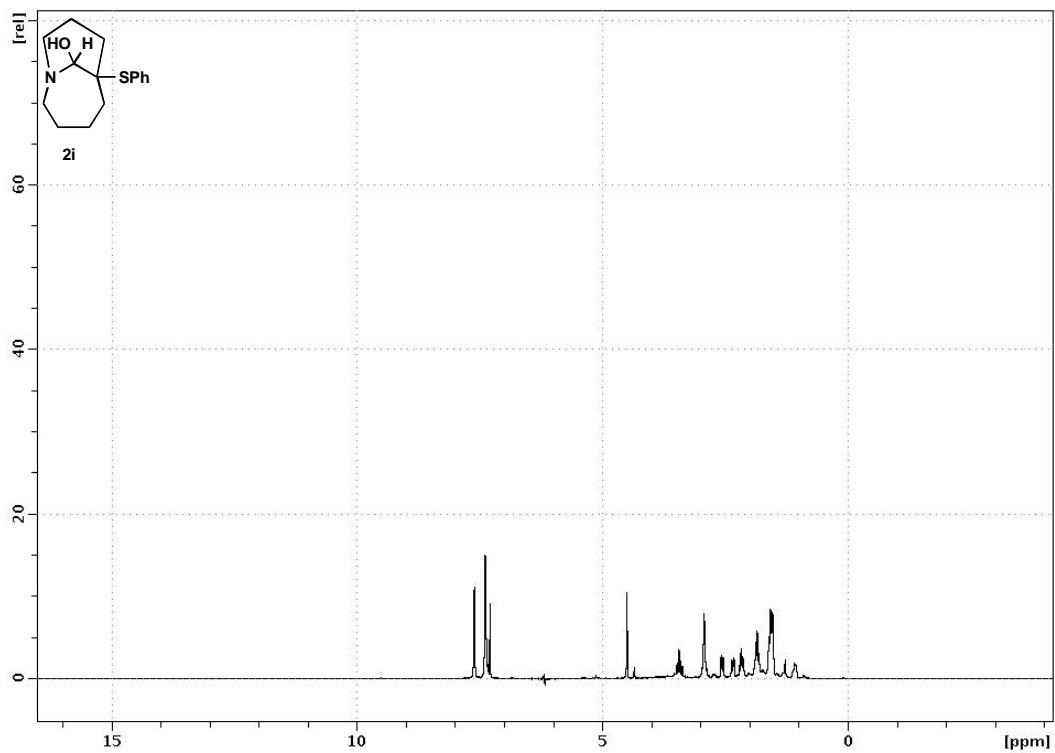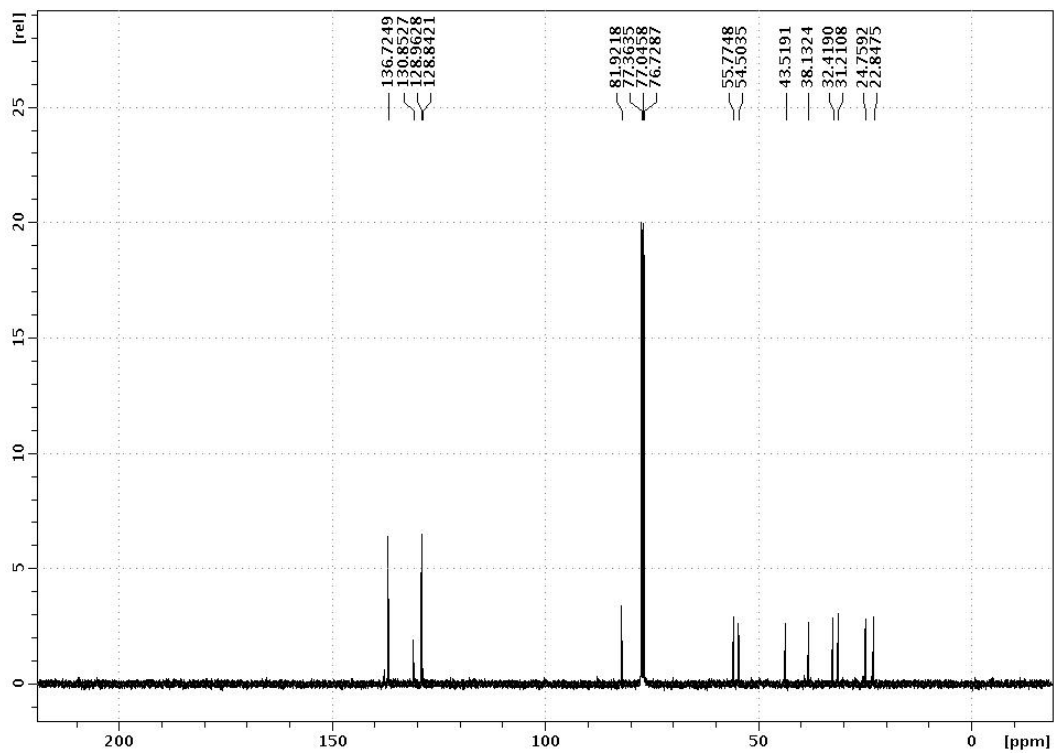

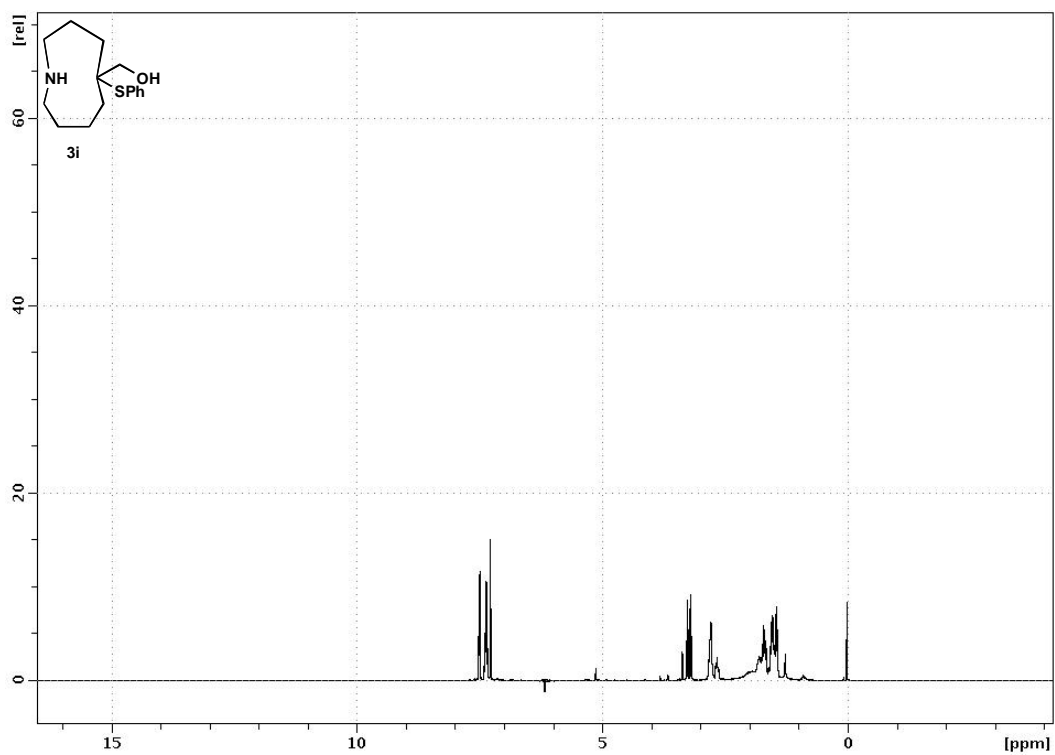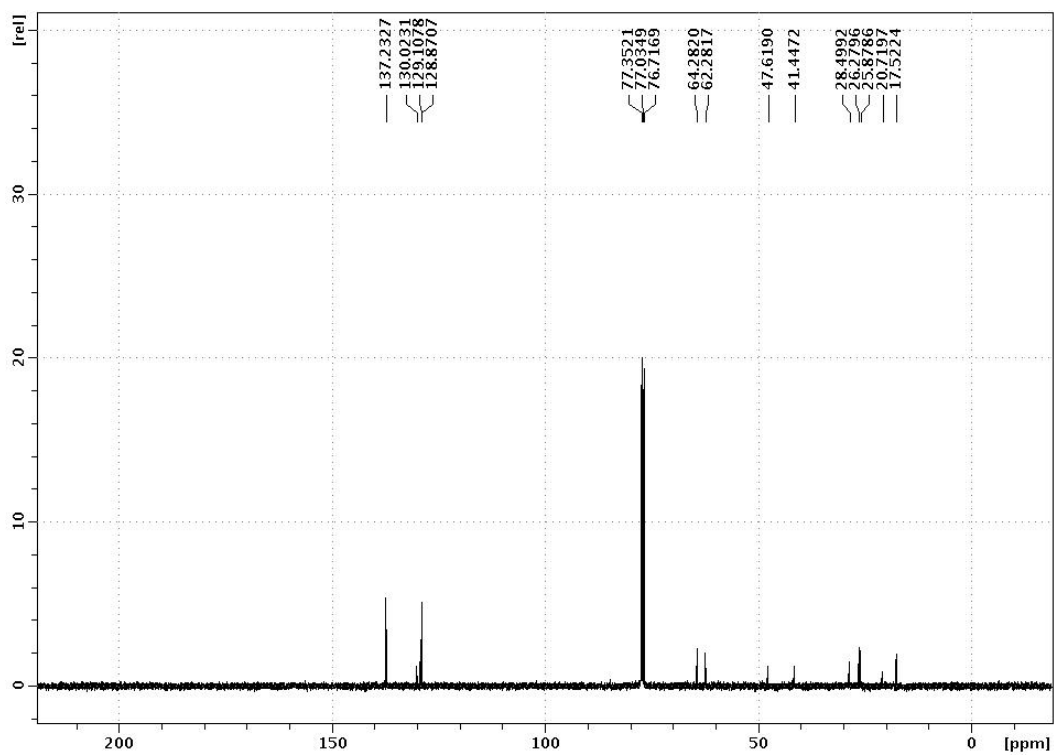

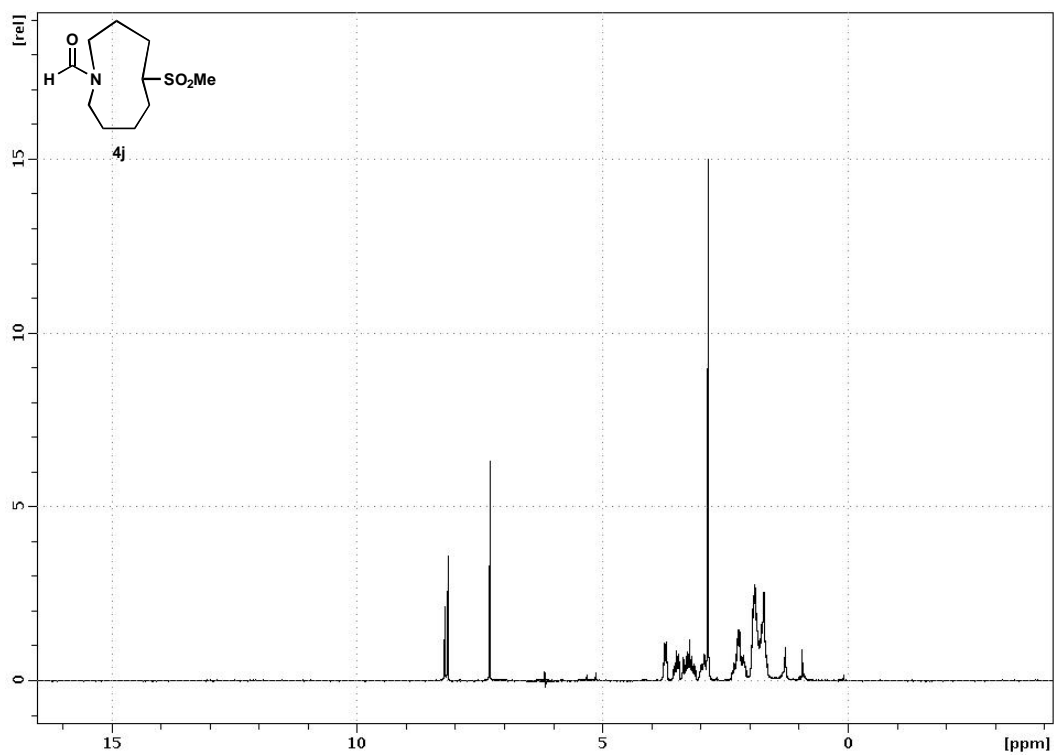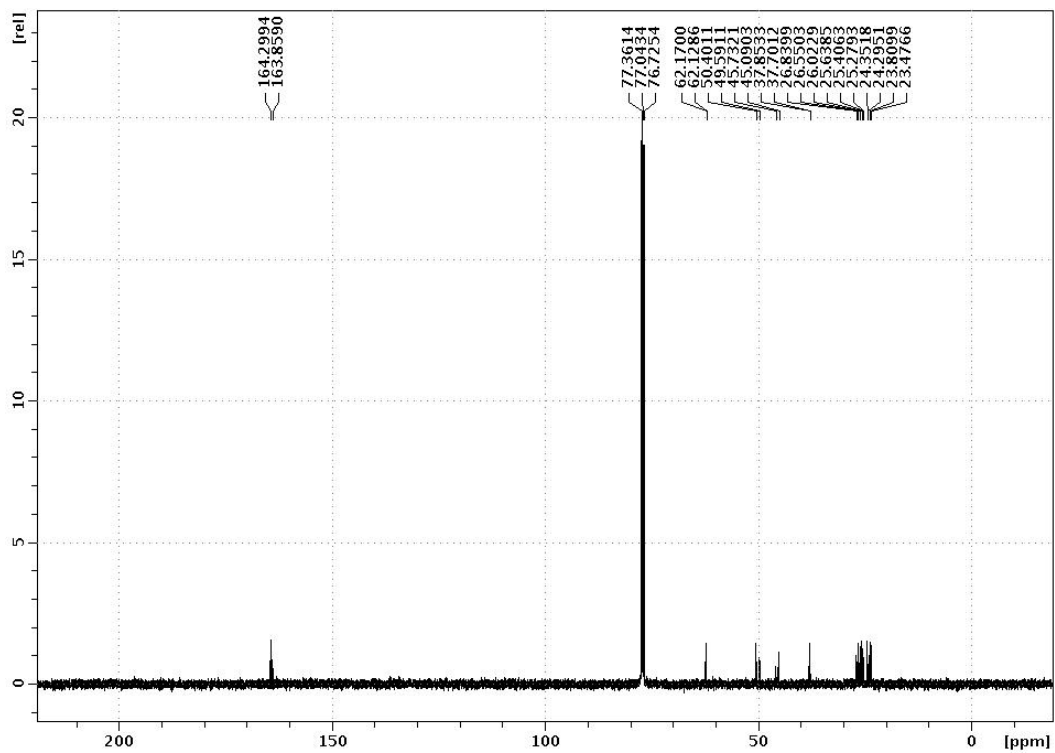

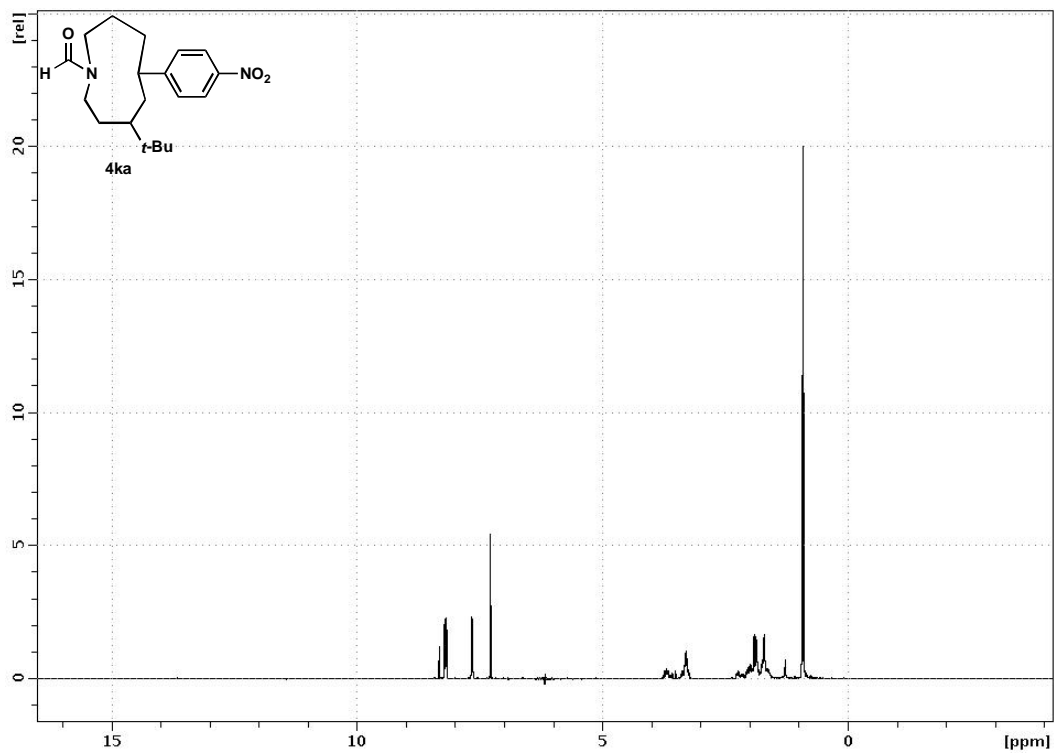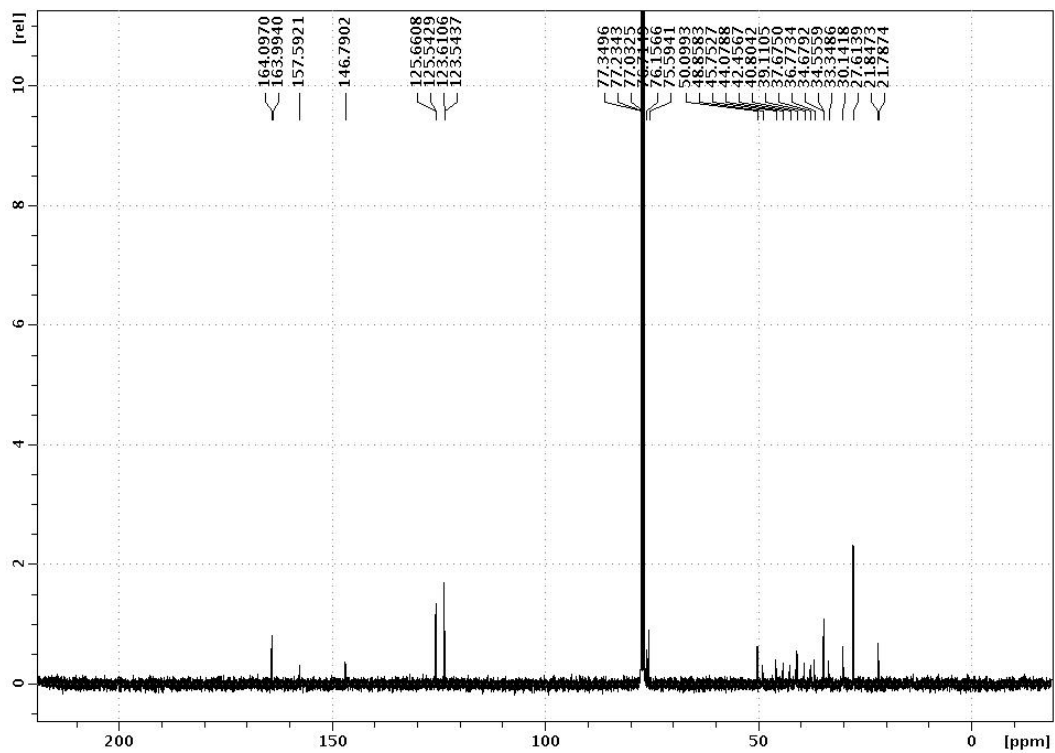

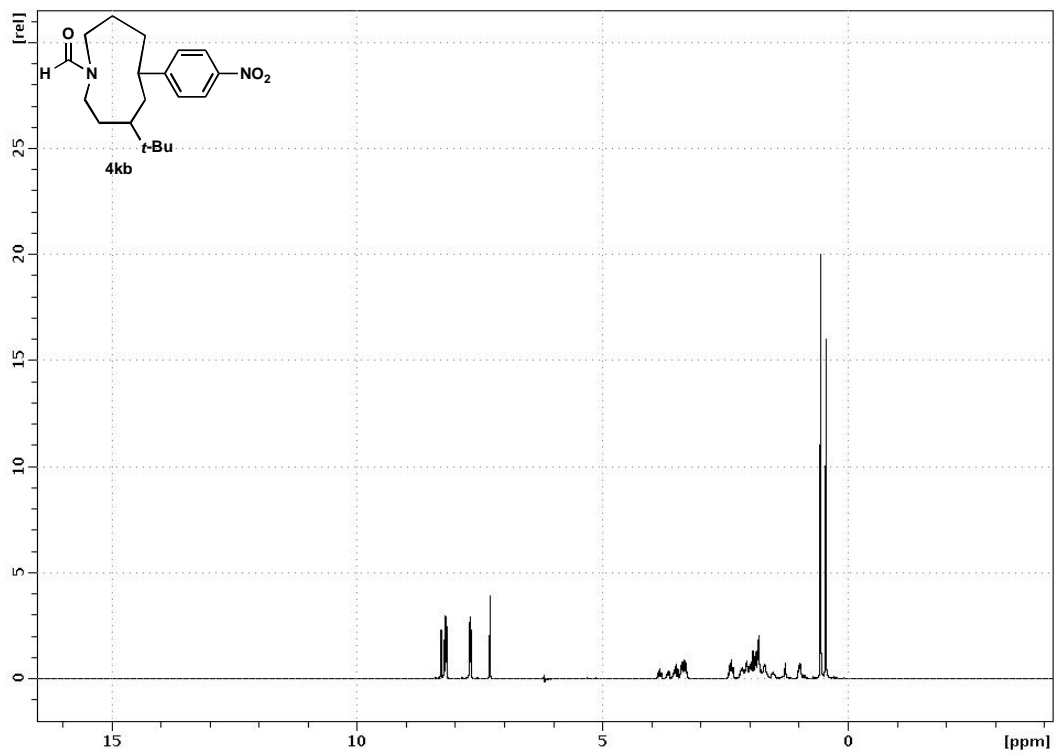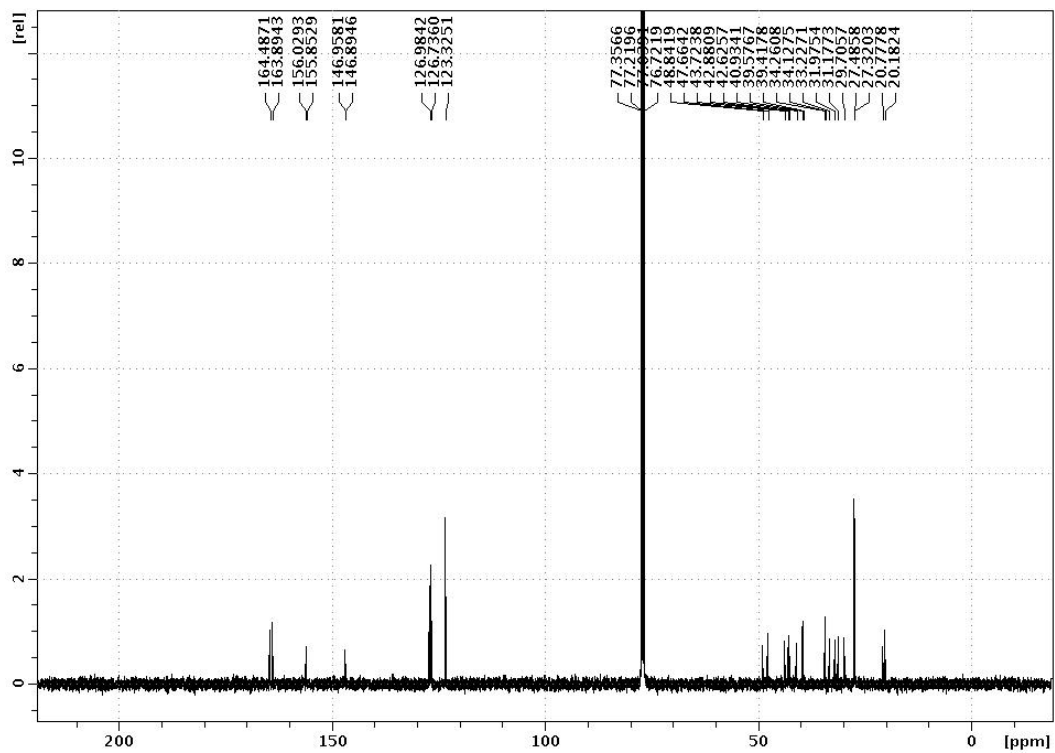

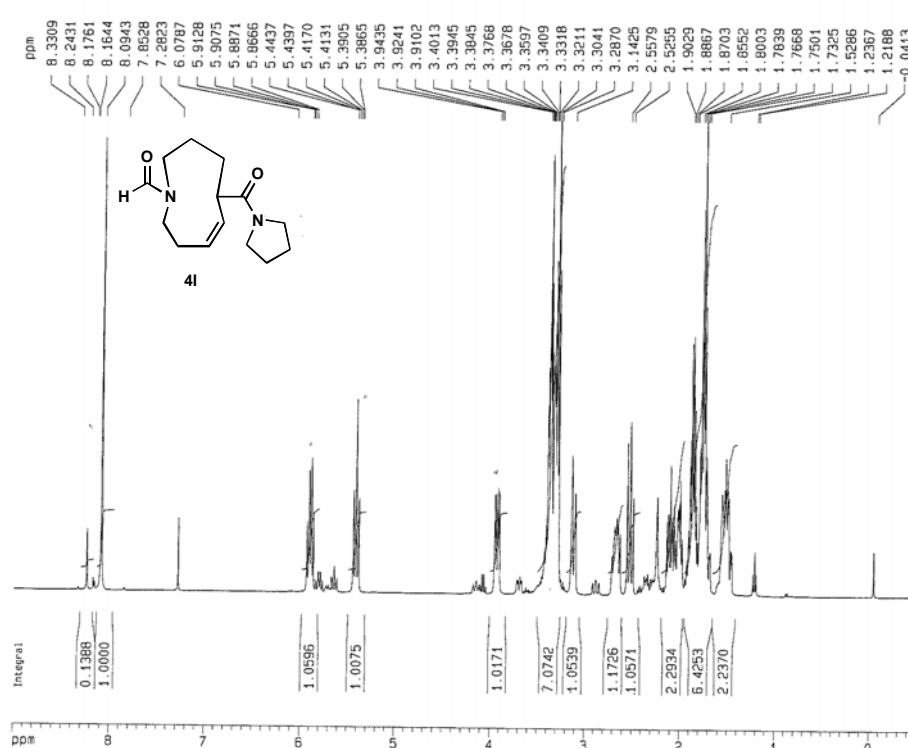

Current Data Parameters  
 NAME YL-V-P009  
 EXPNO 3  
 PROCNO 1

F2 - Acquisition Parameters  
 Date\_ 20050519  
 Time 13.24  
 INSTRUM spect  
 PROBHD 5 mm QNP 1H/15  
 PULPROG zg30  
 TD 32768  
 SOLVENT CDCl3  
 NS 16  
 DS 2  
 SWH 4789.272 Hz  
 FIDRES 0.148157 Hz  
 AQ 3.4210291 sec  
 RG 80.6  
 DW 104.400 usec  
 DE 6.00 usec  
 TE 297.3 K  
 D1 1.00000000 sec  
 MCREST 0.00000000 sec  
 MCWRK 0.01500000 sec

----- CHANNEL f1 -----  
 NUC1 1H  
 P1 7.00 usec  
 PL1 -3.00 dB  
 SFO1 400.1320007 MHz

F2 - Processing parameters  
 SI 32768  
 SF 400.1300000 MHz  
 WDW EM  
 SSB 0  
 LB 0.30 Hz  
 GB 0  
 PC 1.00

1D NMR plot parameters  
 CX 20.00 cm  
 CY 0.00 cm  
 F1P 9.000 ppm  
 F1 3601.17 Hz  
 F2P -0.500 ppm  
 F2 -200.07 Hz  
 PPMCM 0.47500 ppm/cm  
 HZCM 190.06175 Hz/cm

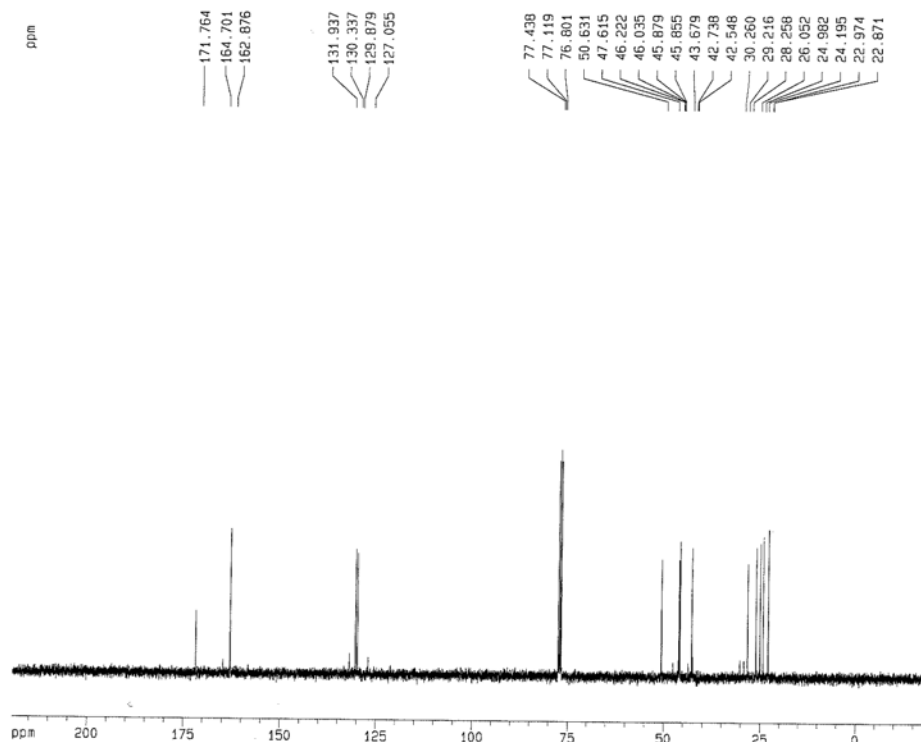

Current Data Parameters  
 NAME YL-V-P009  
 EXPNO 4  
 PROCNO 1

F2 - Acquisition Parameters  
 Date\_ 20050519  
 Time 13.27  
 INSTRUM spect  
 PROBHD 5 mm QNP 1H/15  
 PULPROG zgpg30  
 TD 65536  
 SOLVENT CDCl3  
 NS 81  
 DS 4  
 SWH 23980.84 Hz  
 FIDRES 0.385818 Hz  
 AQ 1.3664756 sec  
 RG 2048  
 DW 20.850 usec  
 DE 6.00 usec  
 TE 297.3 K  
 D1 0.15000001 sec  
 d11 0.03000000 sec  
 DELTA 0.05000000 sec  
 MCREST 0.00000000 sec  
 MCWRK 0.01500000 sec

----- CHANNEL f1 -----  
 NUC1 13C  
 P1 7.20 usec  
 PL1 -2.00 dB  
 SFO1 100.6282898 MHz

----- CHANNEL f2 -----  
 CPDPRG2 waltz16  
 NUC2 1H  
 PCPD2 99.40 usec  
 PL2 -3.00 dB  
 PL12 19.98 dB  
 PL13 120.00 dB  
 SFO2 400.1315005 MHz

F2 - Processing parameters  
 SI 32768  
 SF 100.6127890 MHz  
 WDW EM  
 SSB 0  
 LB 1.00 Hz  
 GB 0  
 PC 1.40

1D NMR plot parameters  
 CX 20.00 cm  
 CY 5.00 cm  
 F1P 219.169 ppm  
 F1 20051.21 Hz  
 F2P -19.178 ppm  
 F2 -1929.61 Hz  
 PPMCM 11.91738 ppm/cm  
 HZCM 1199.04077 Hz/cm

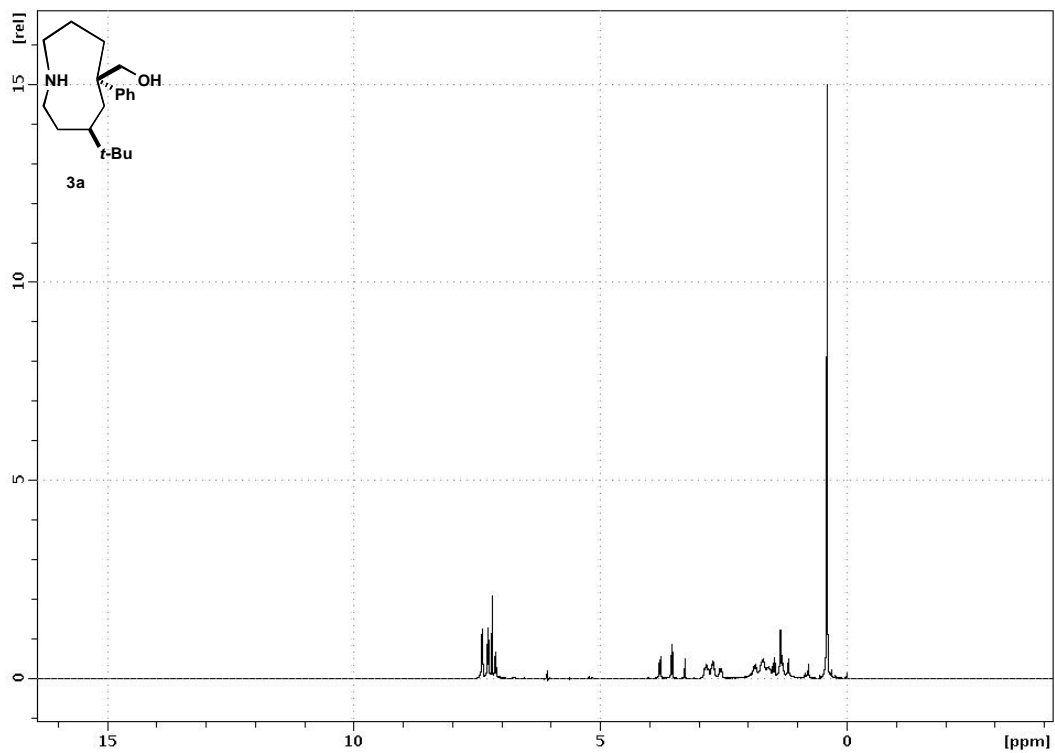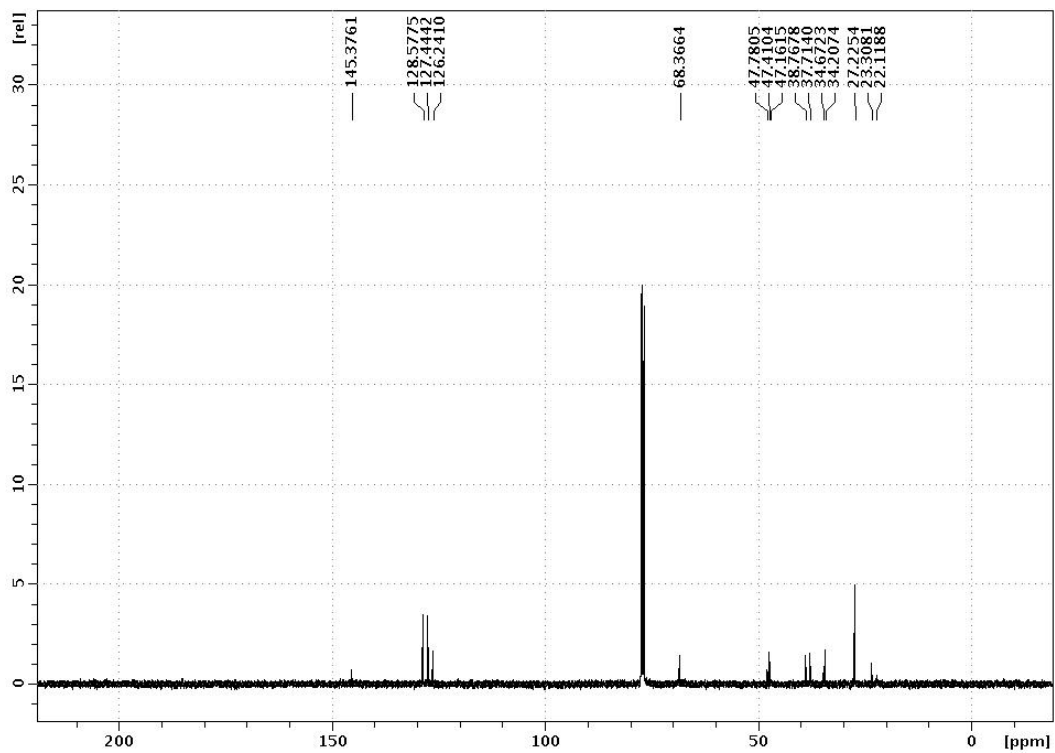

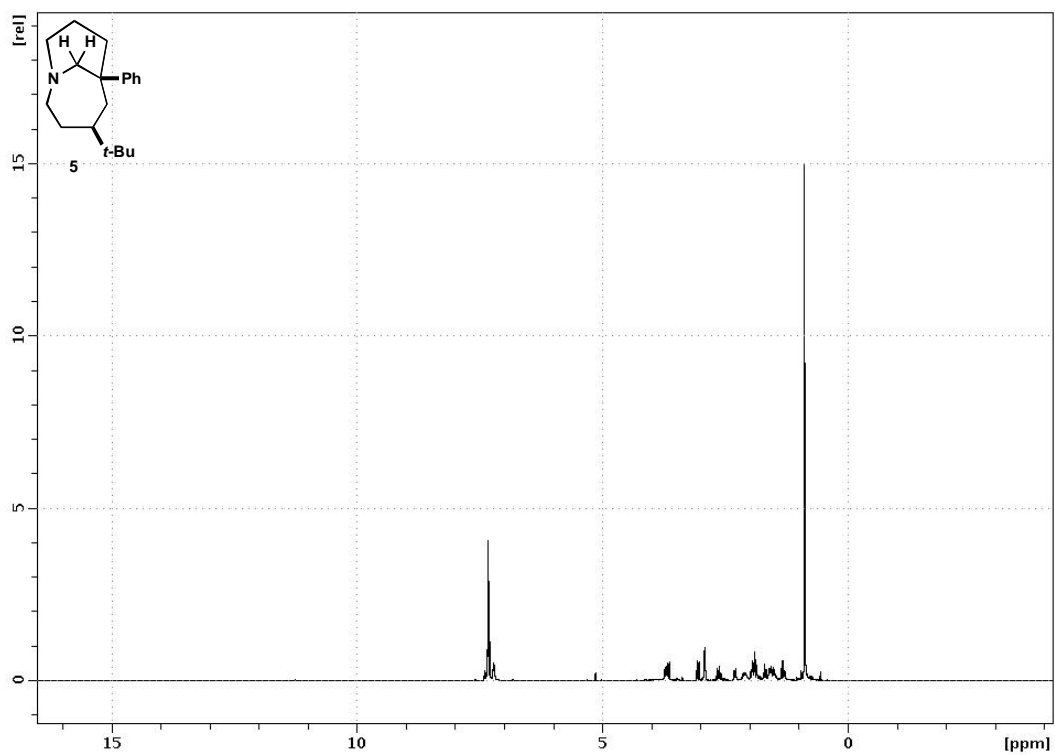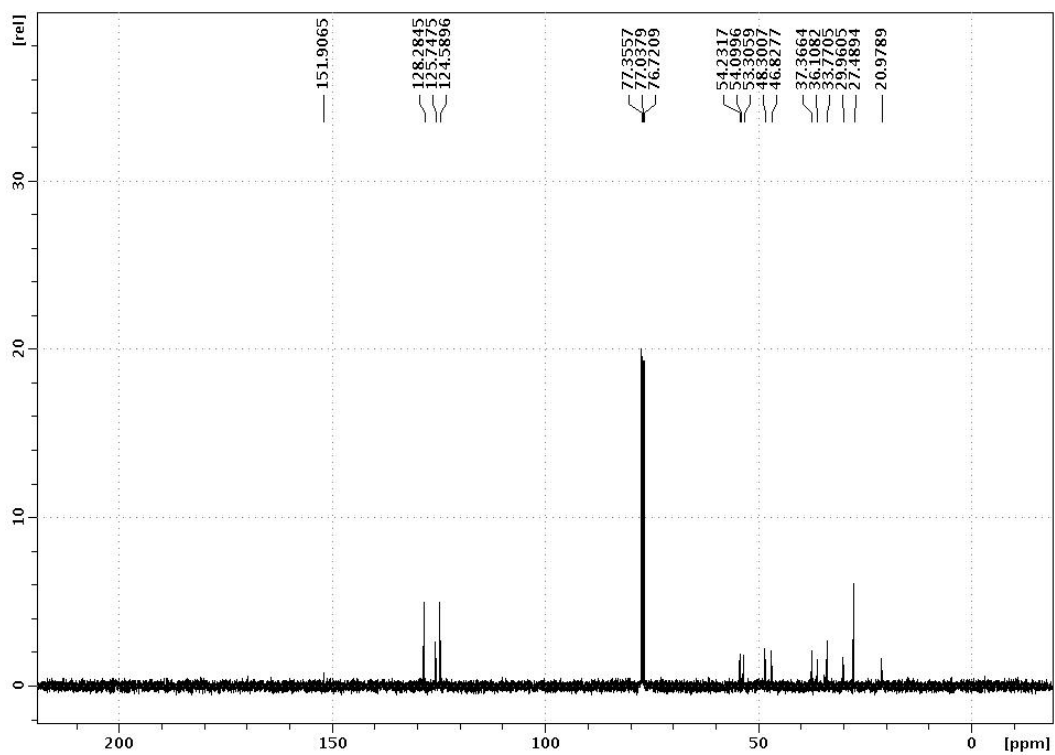



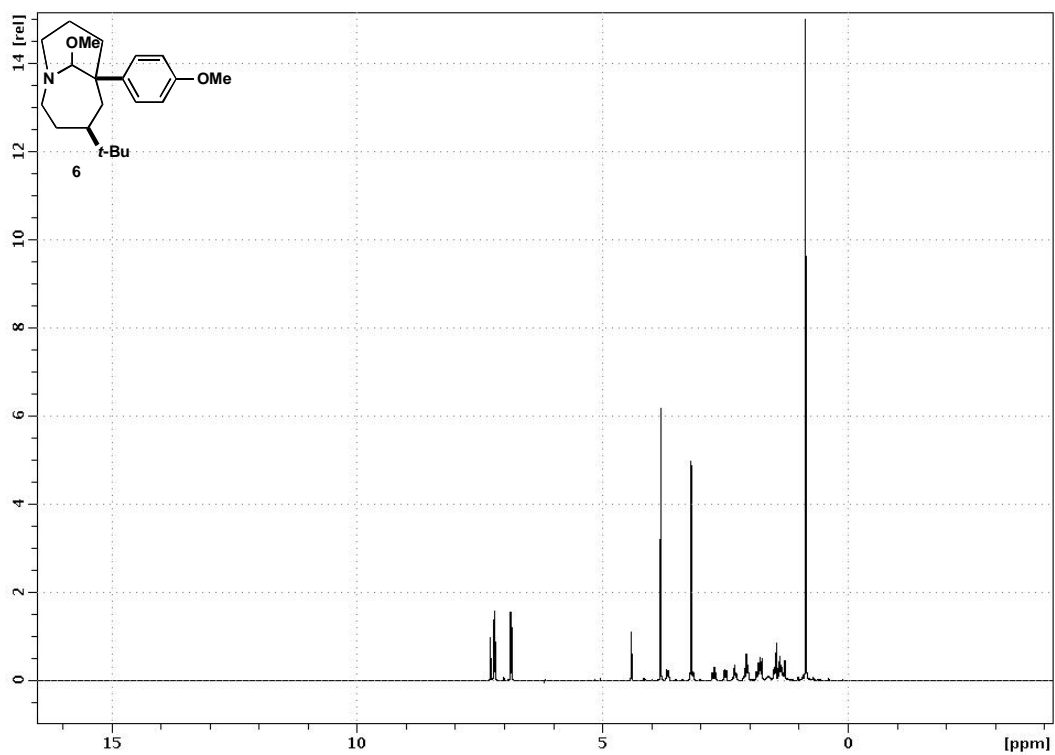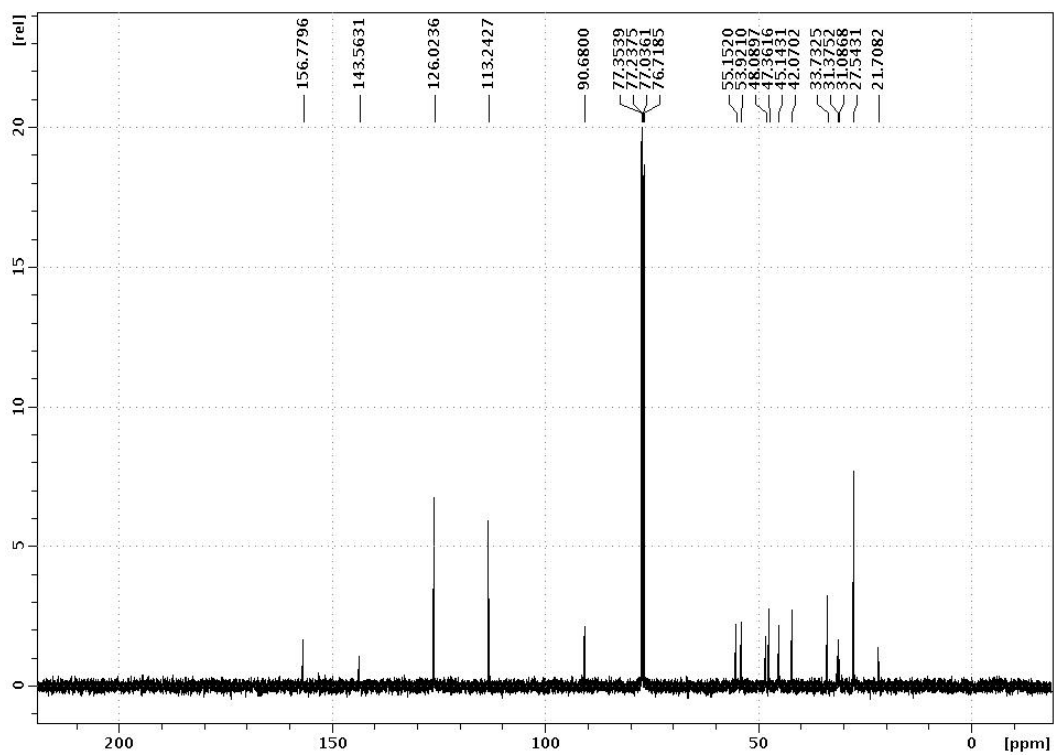

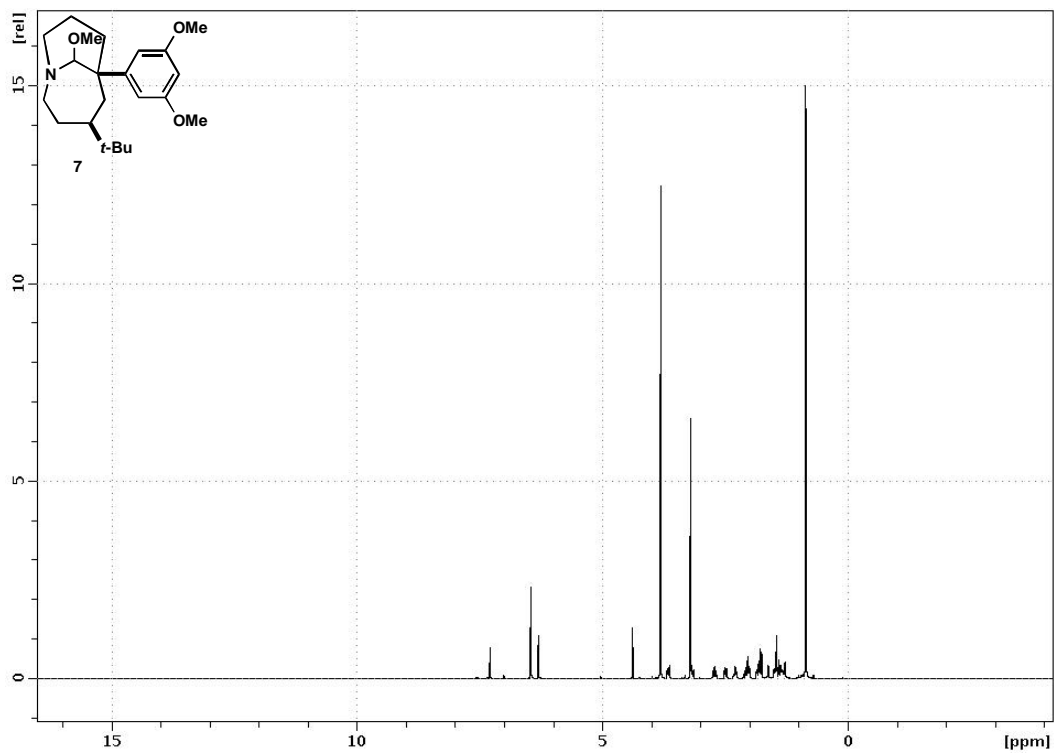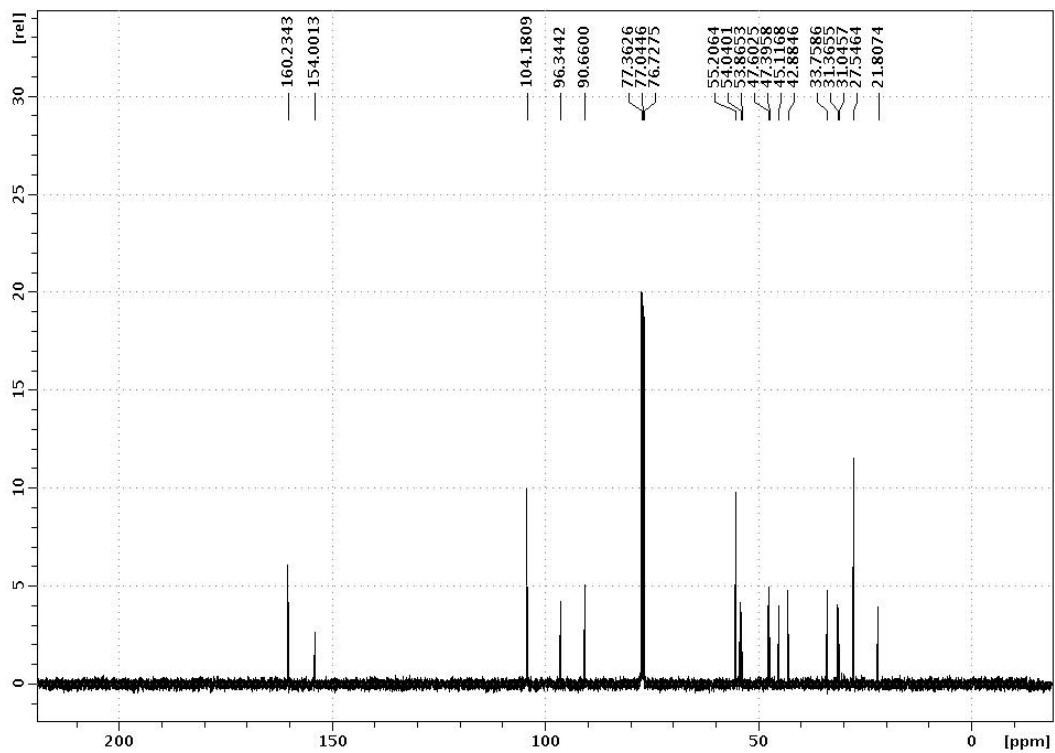

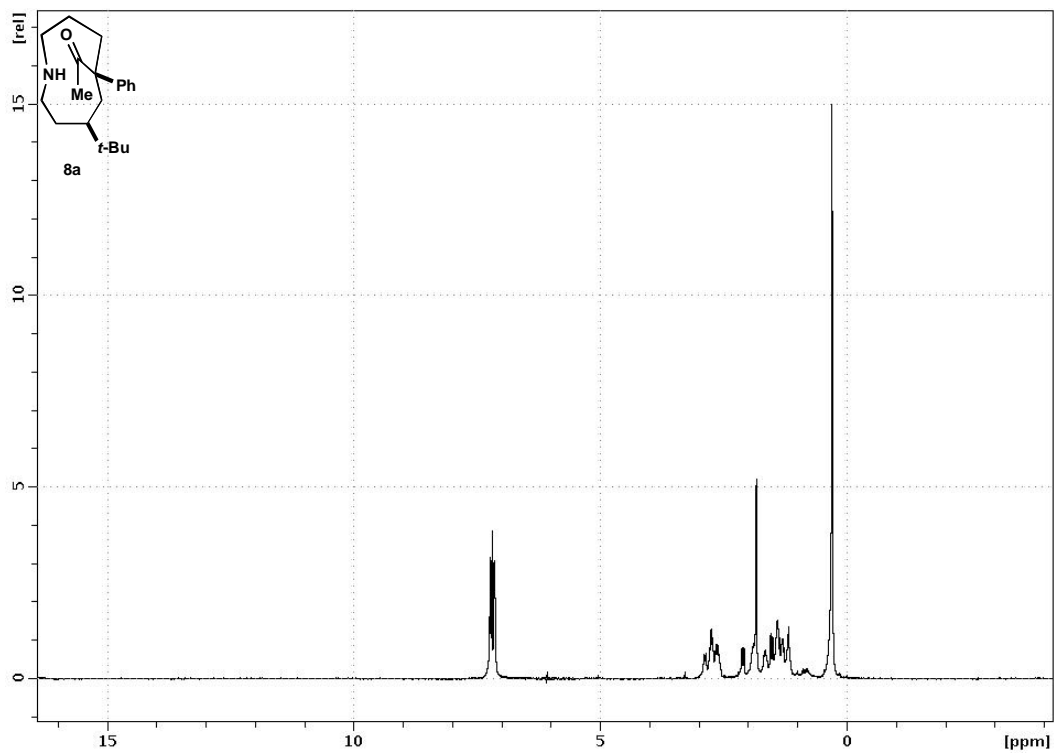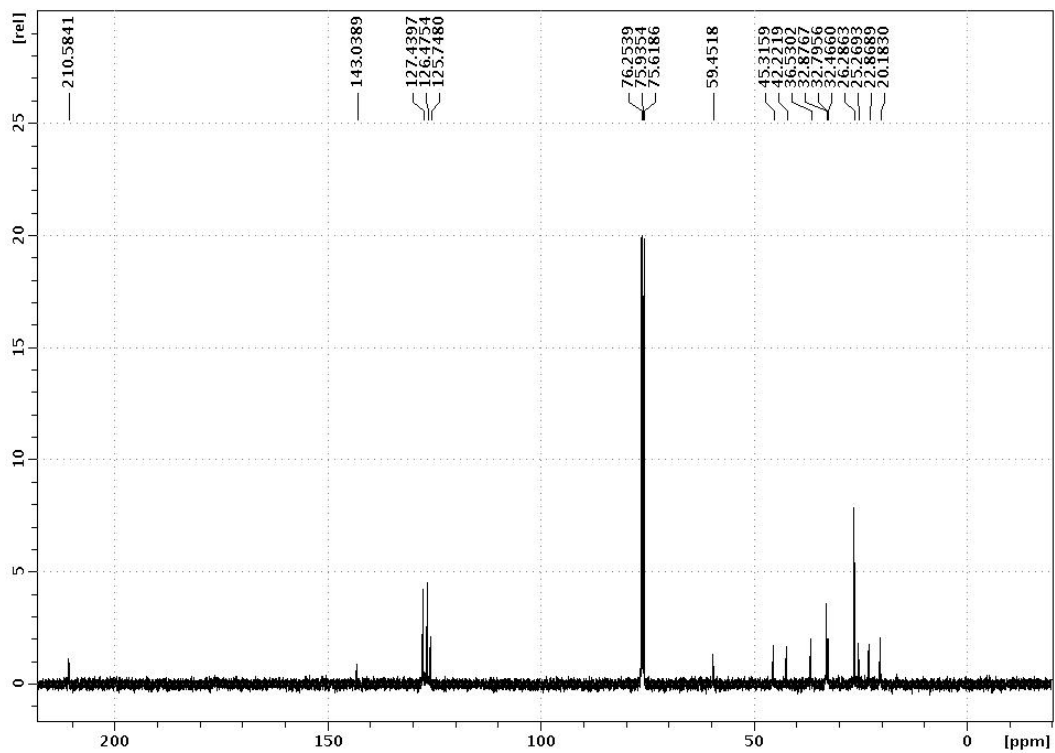

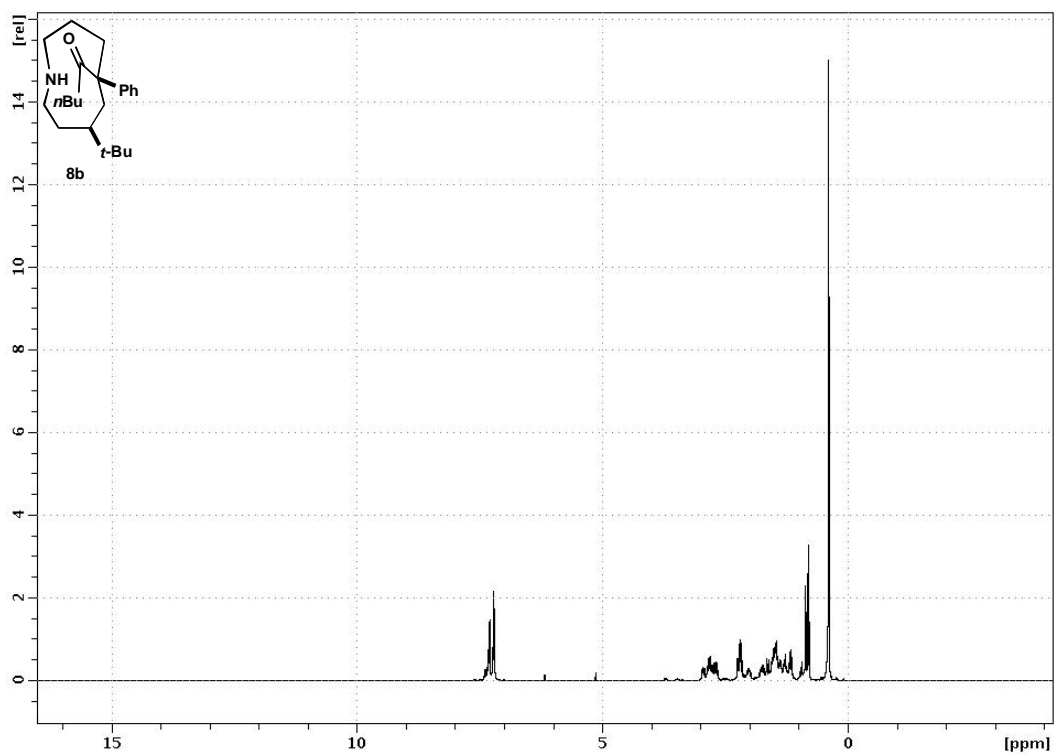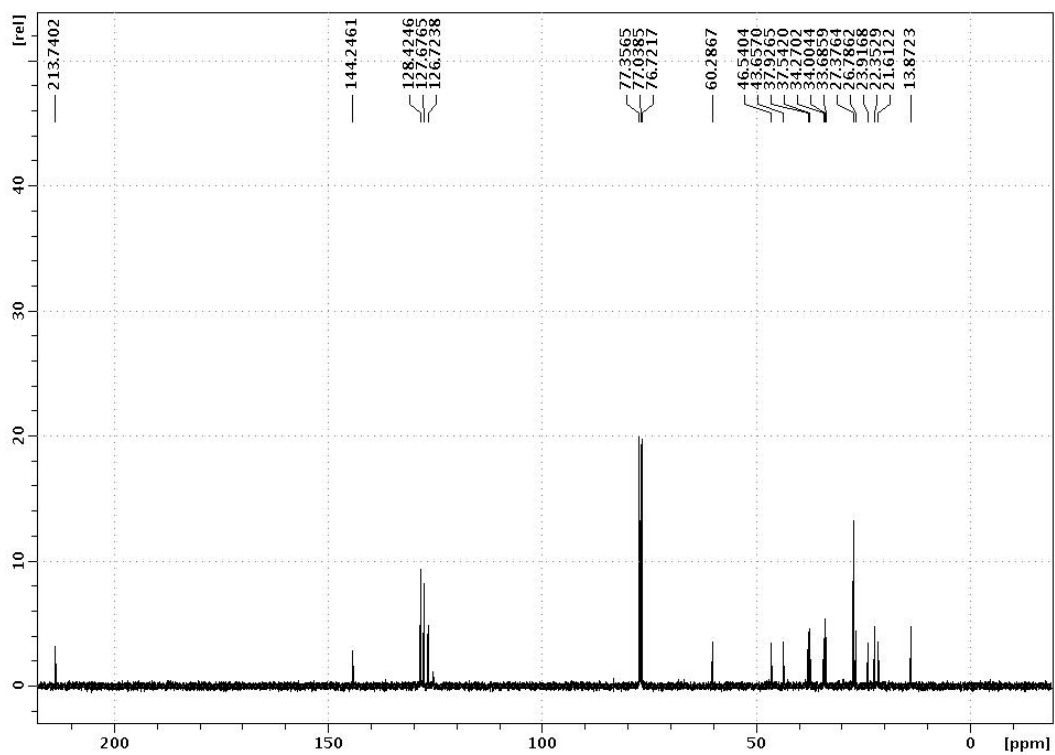

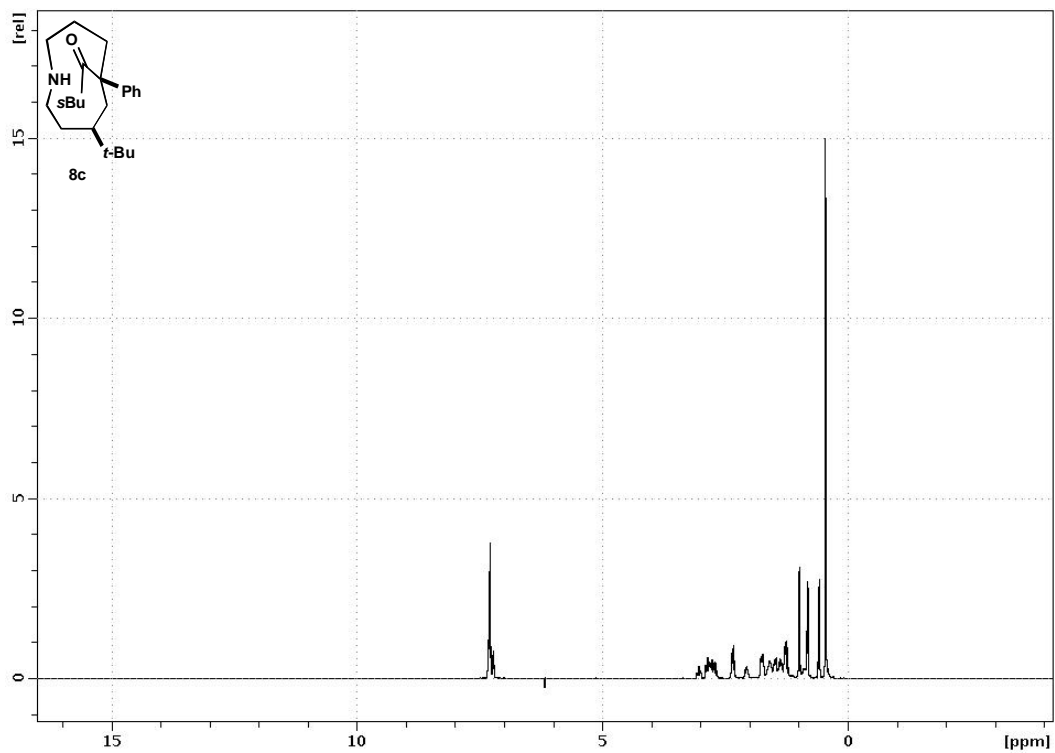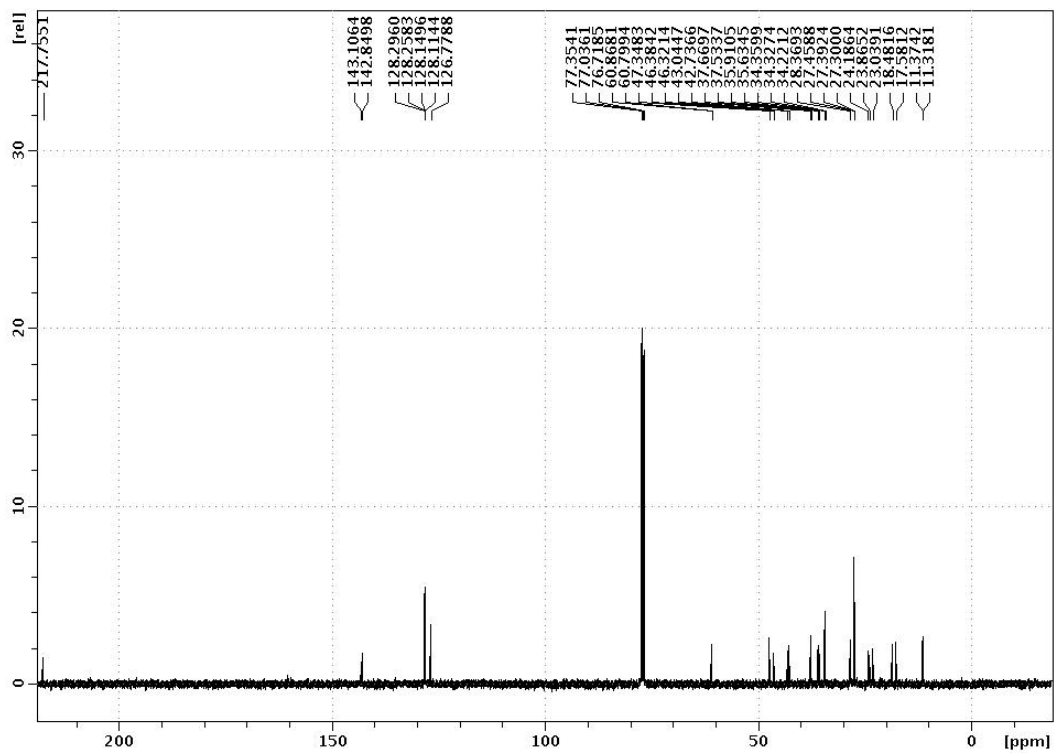

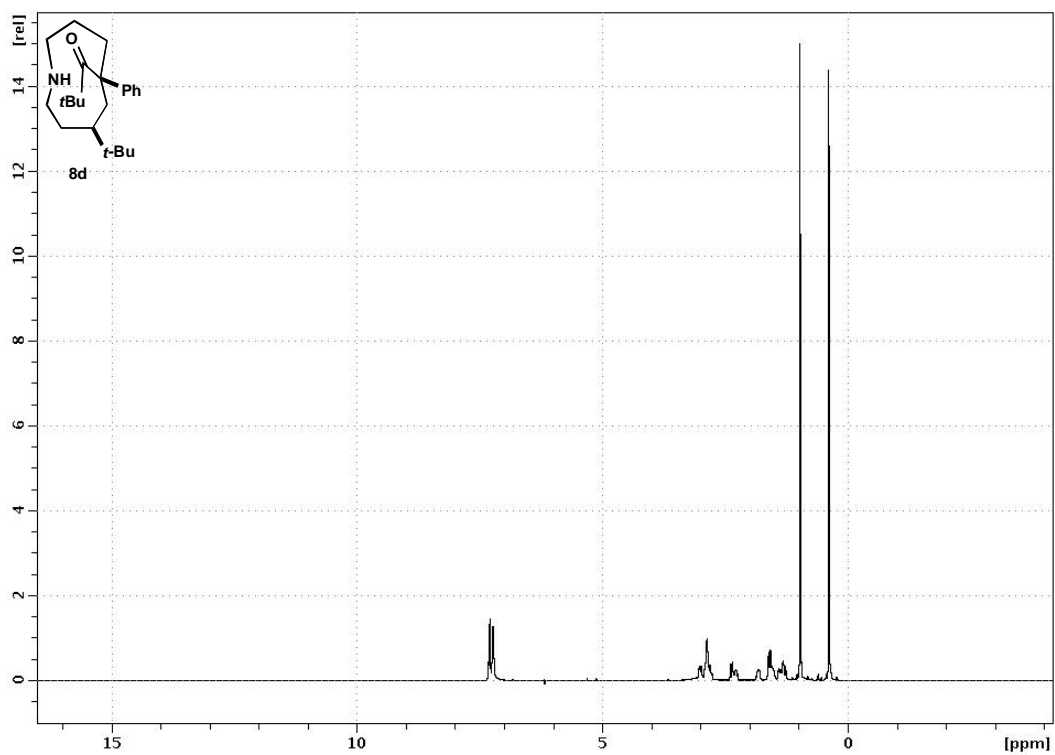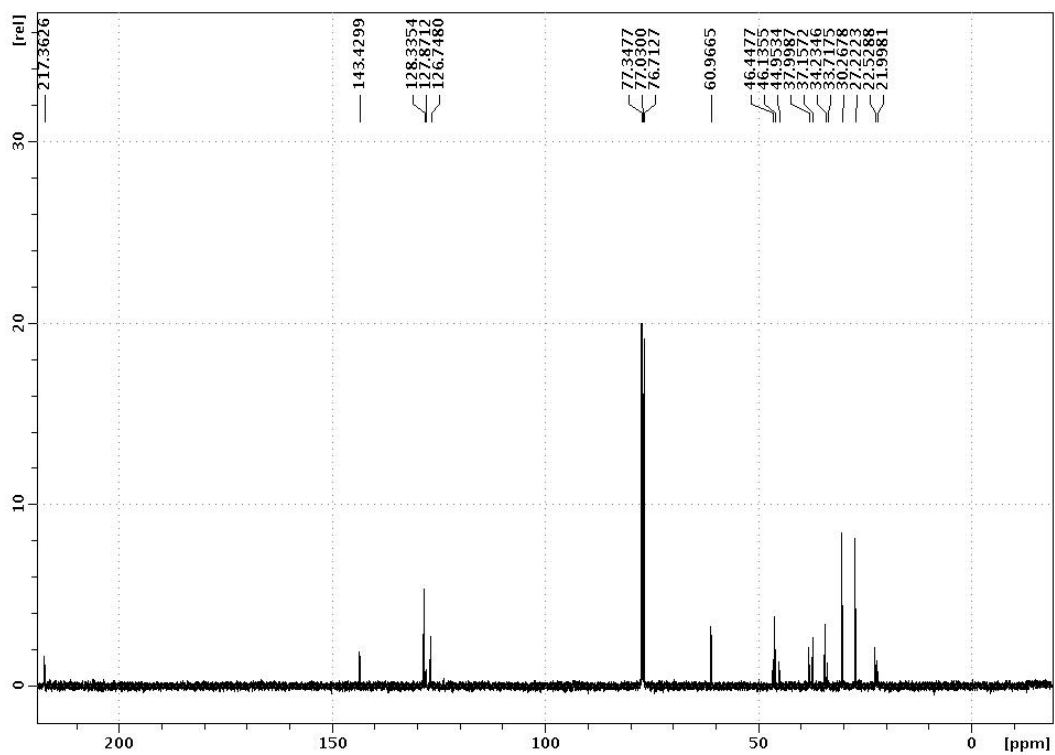

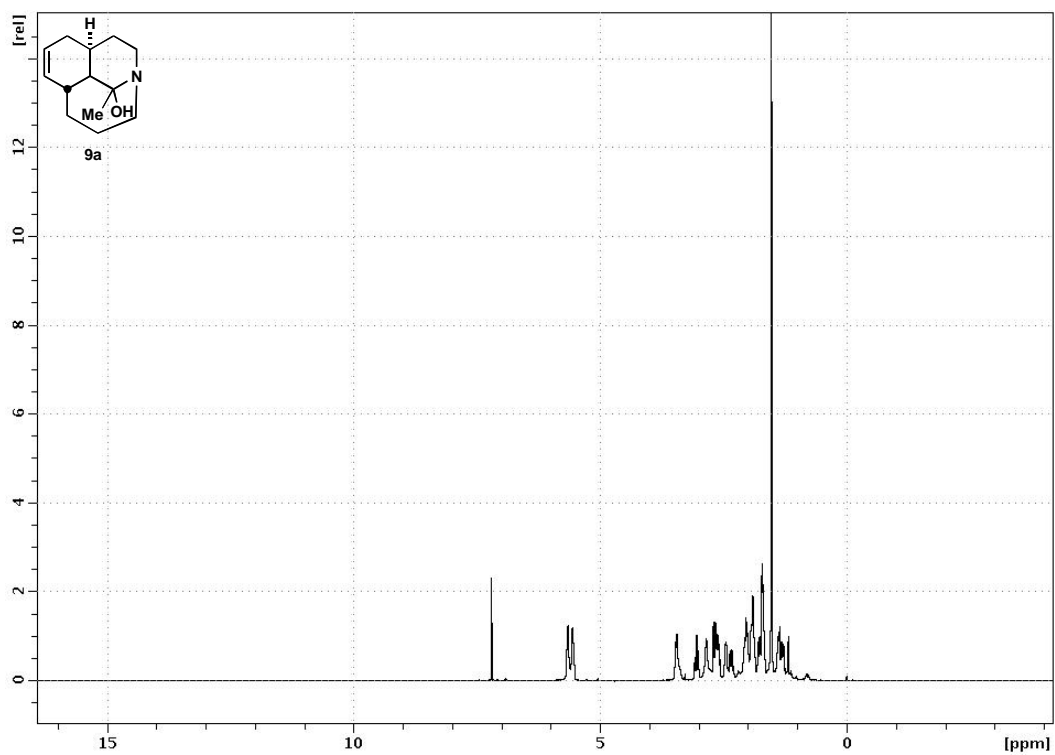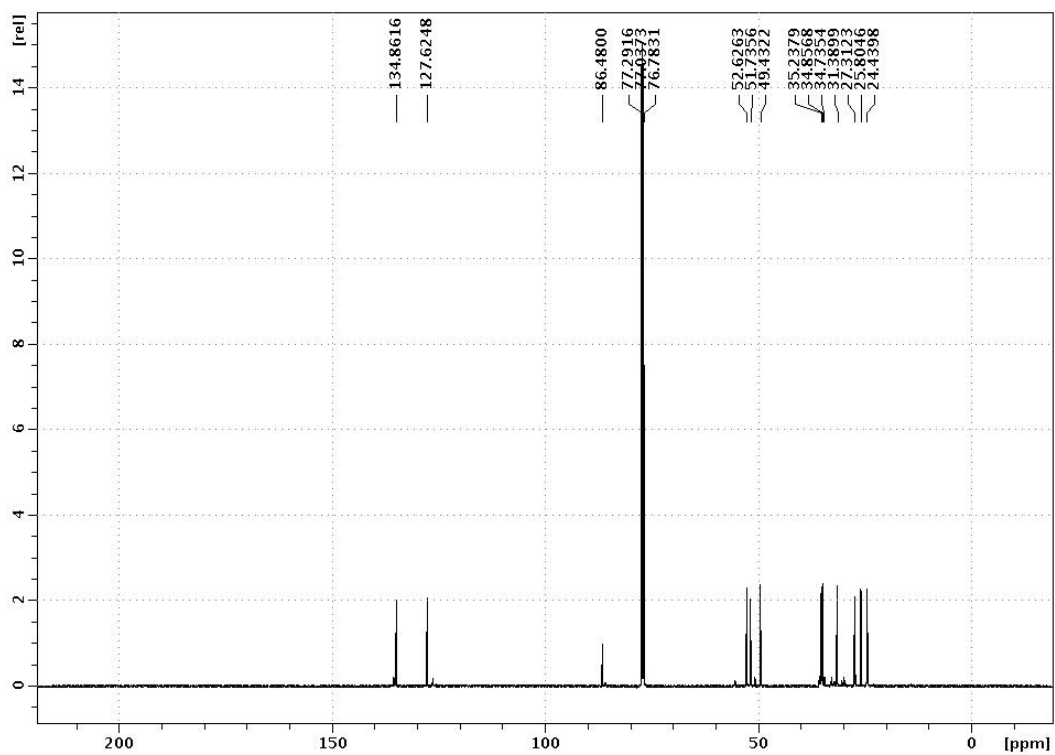

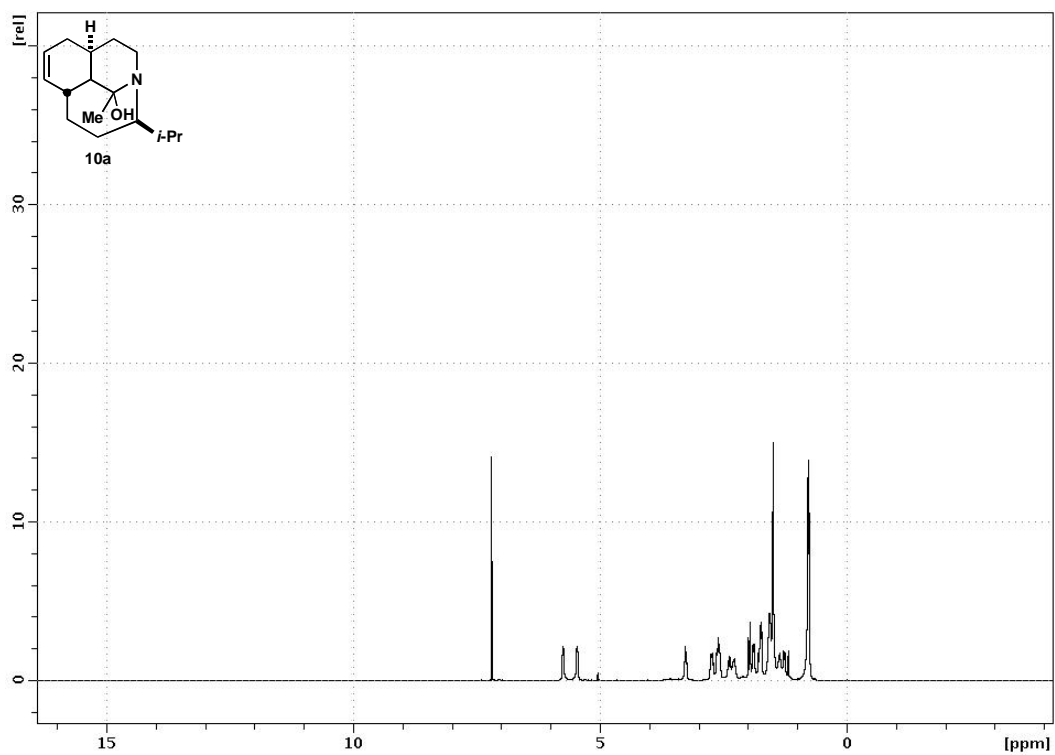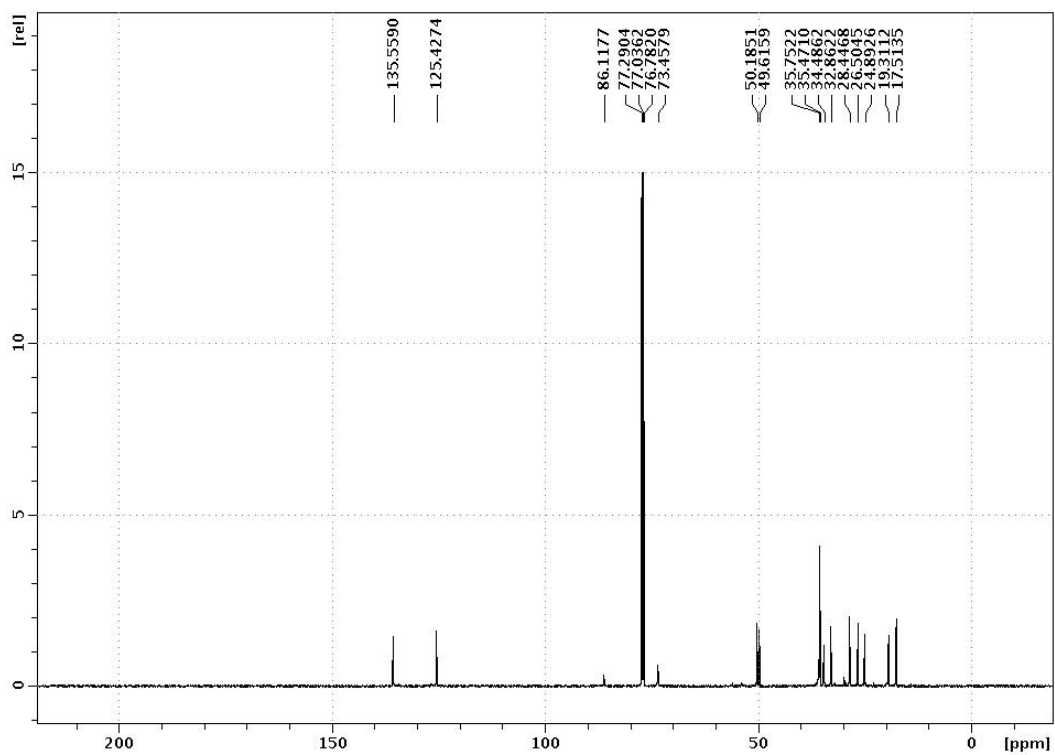



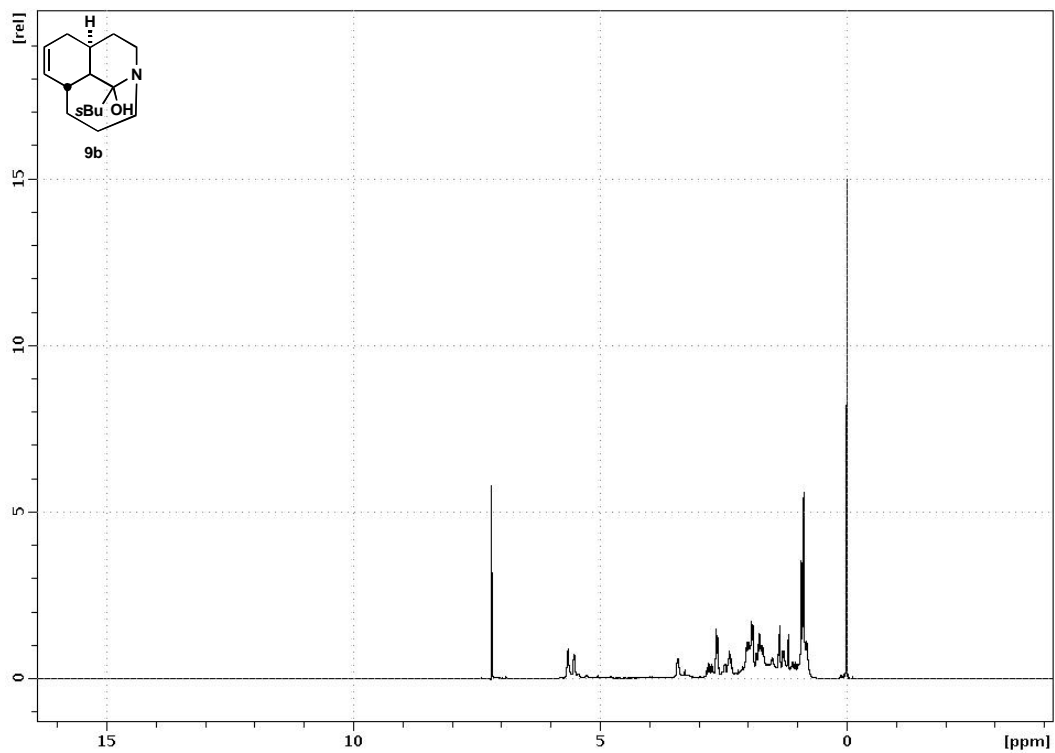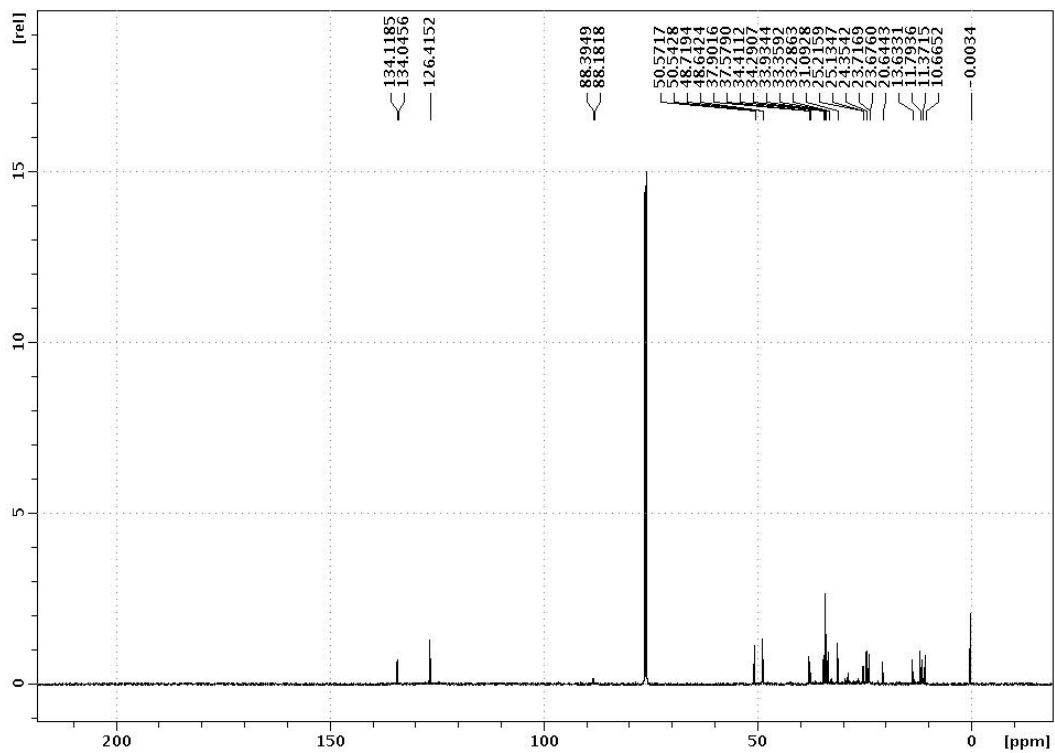

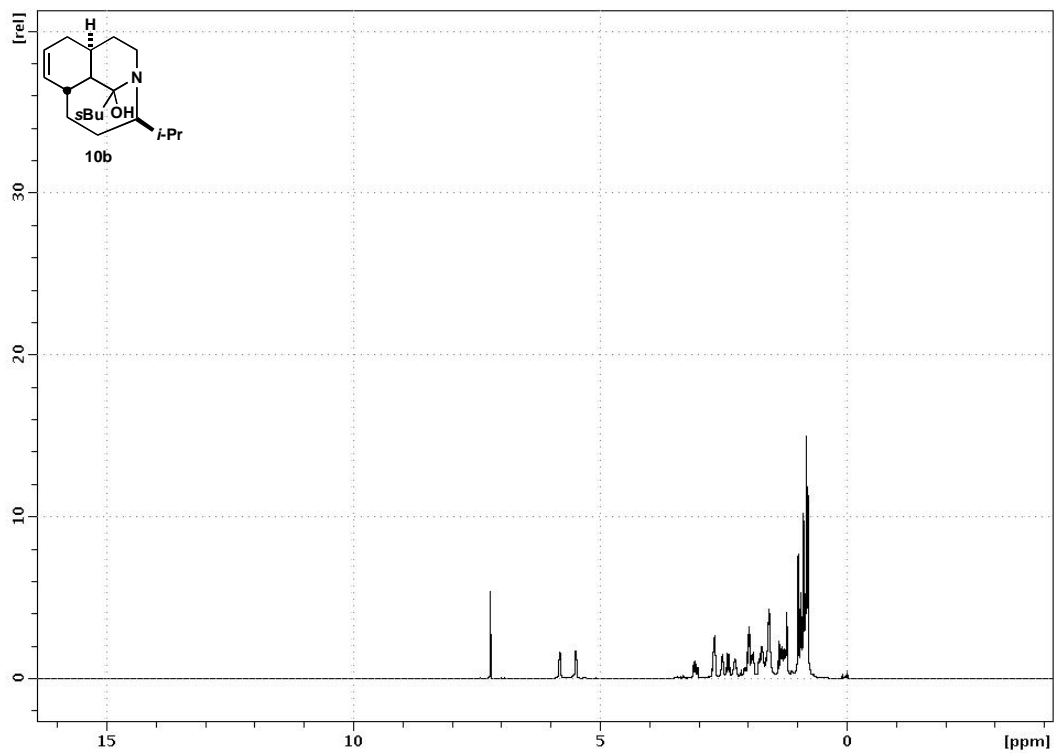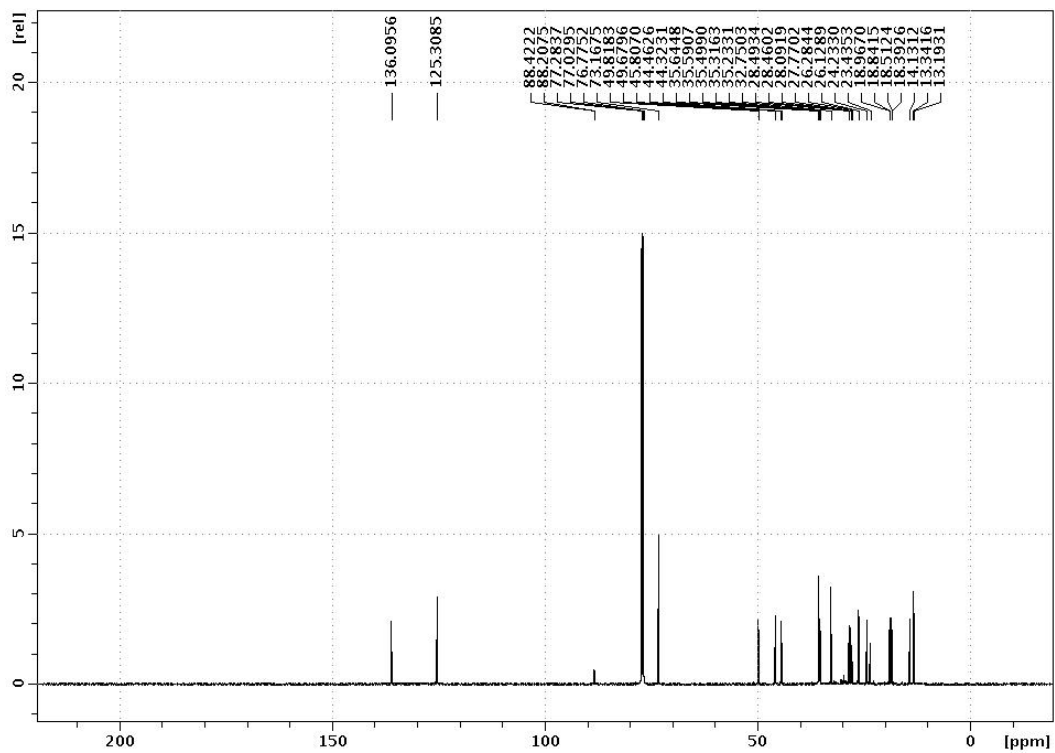

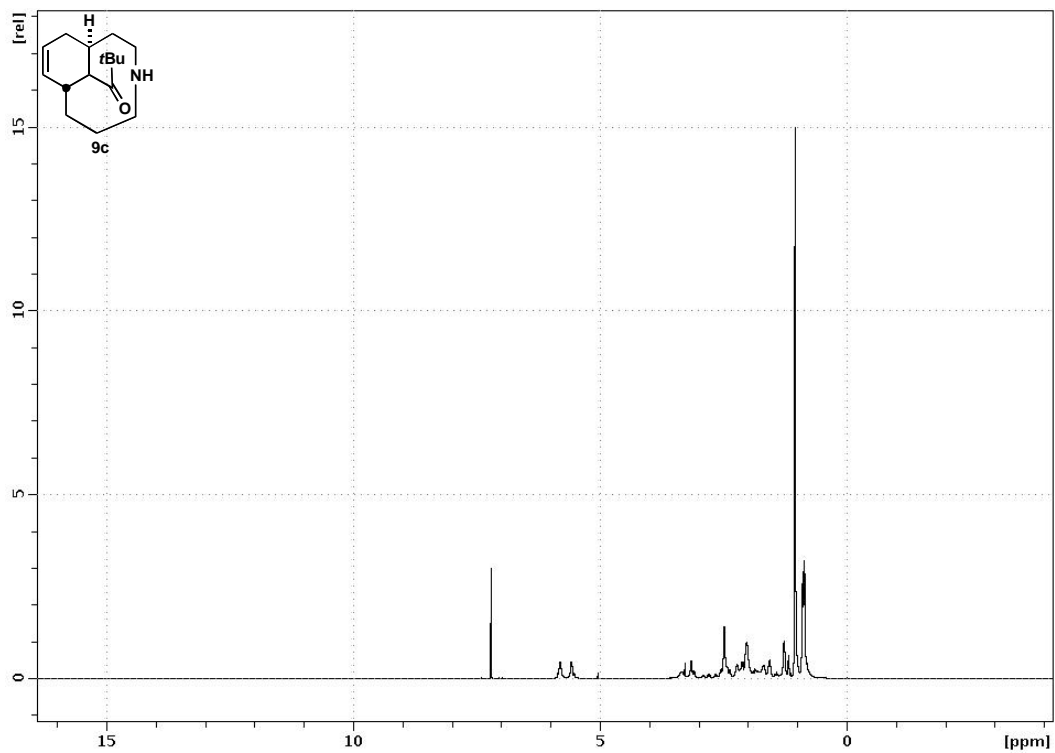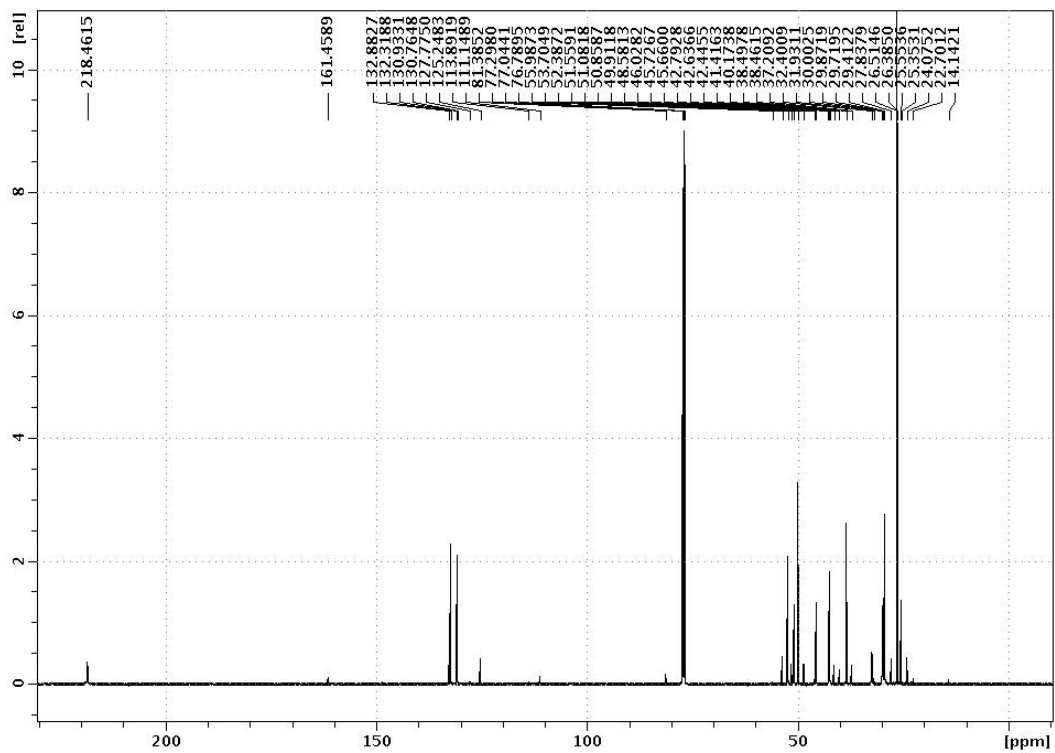

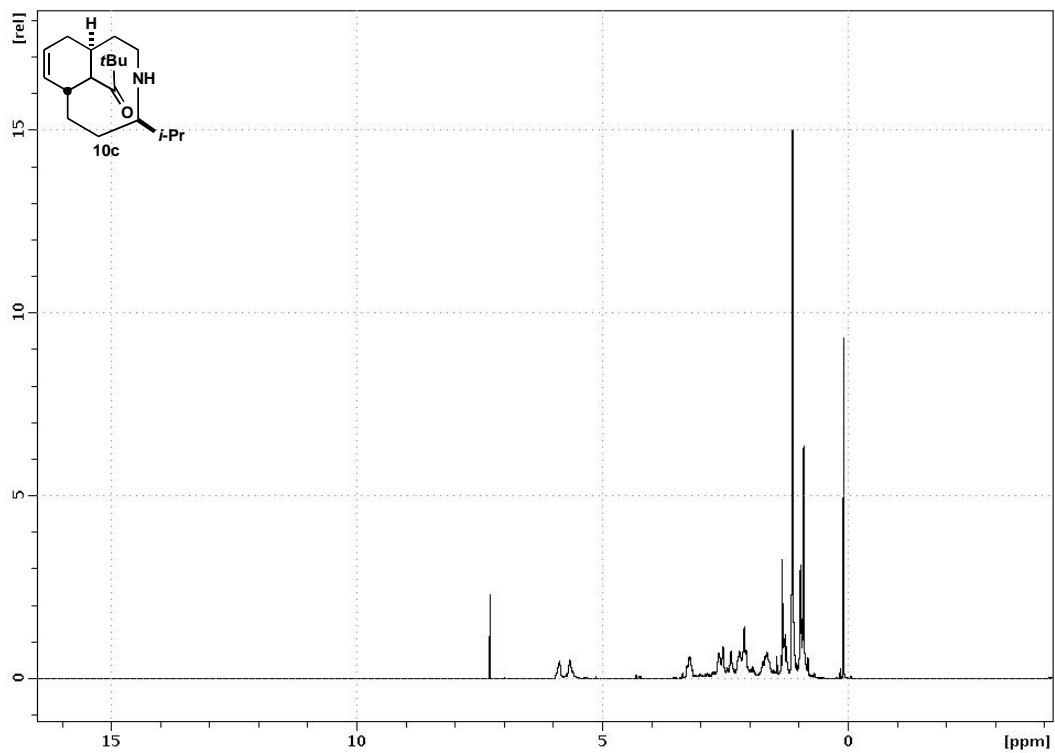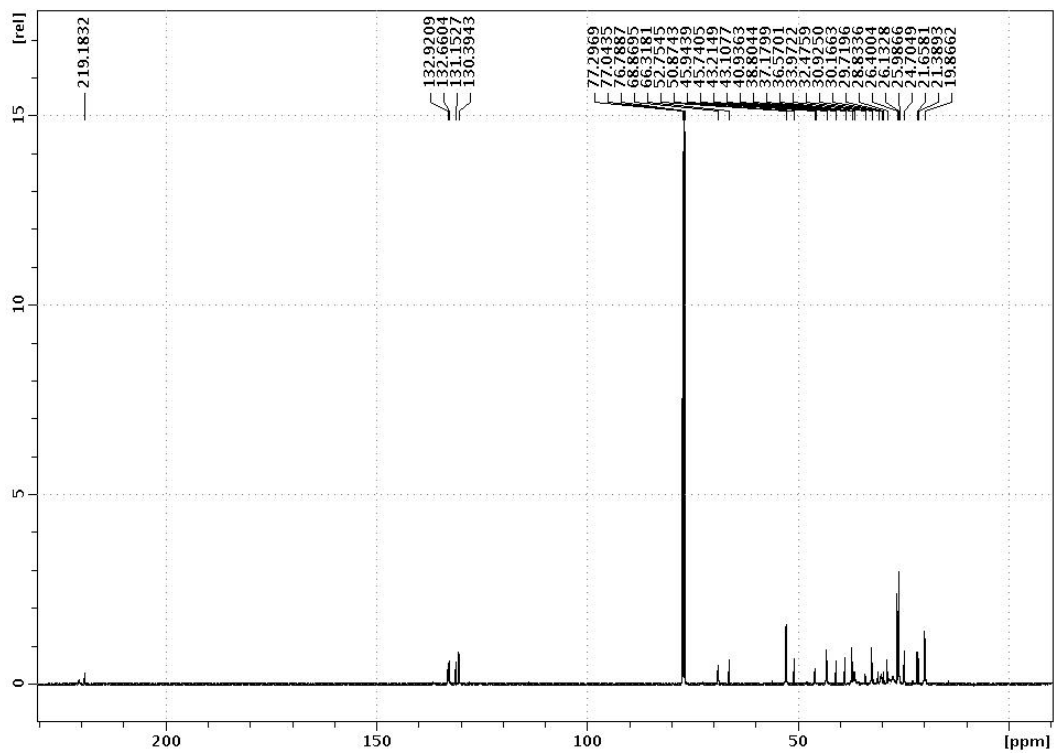

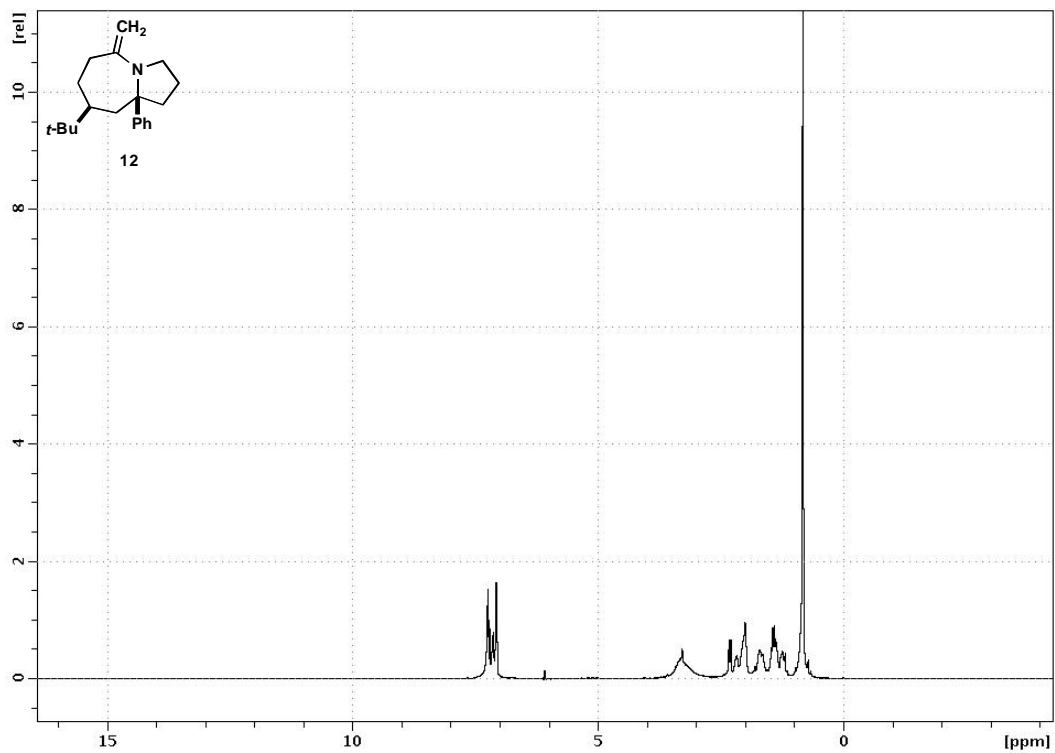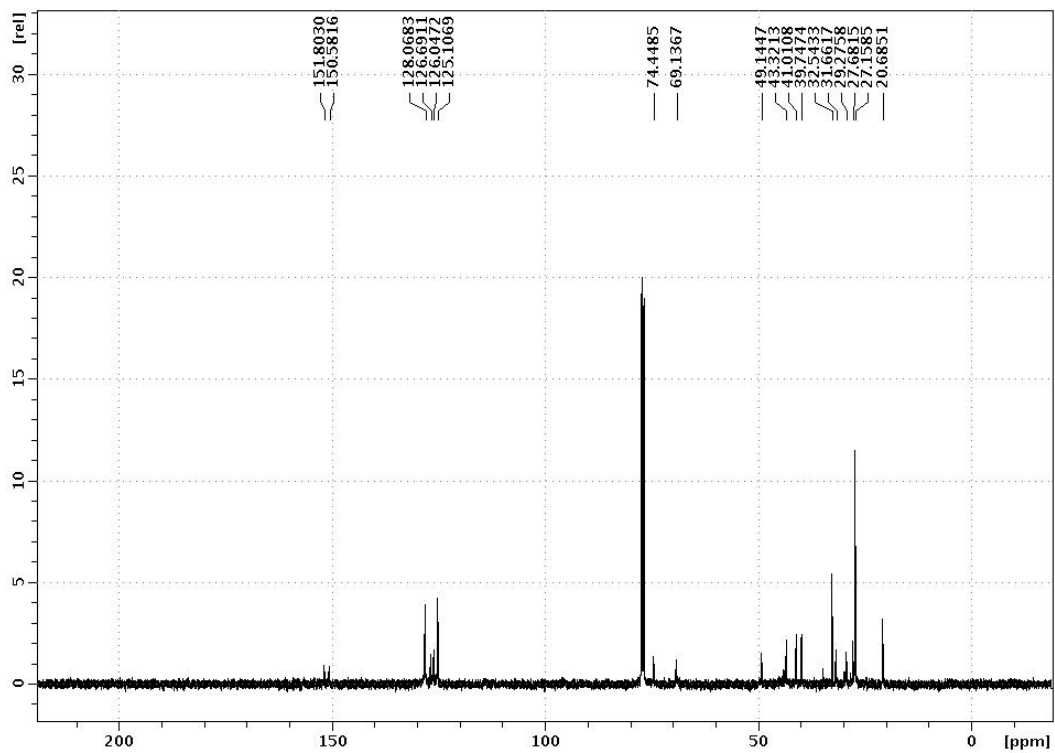

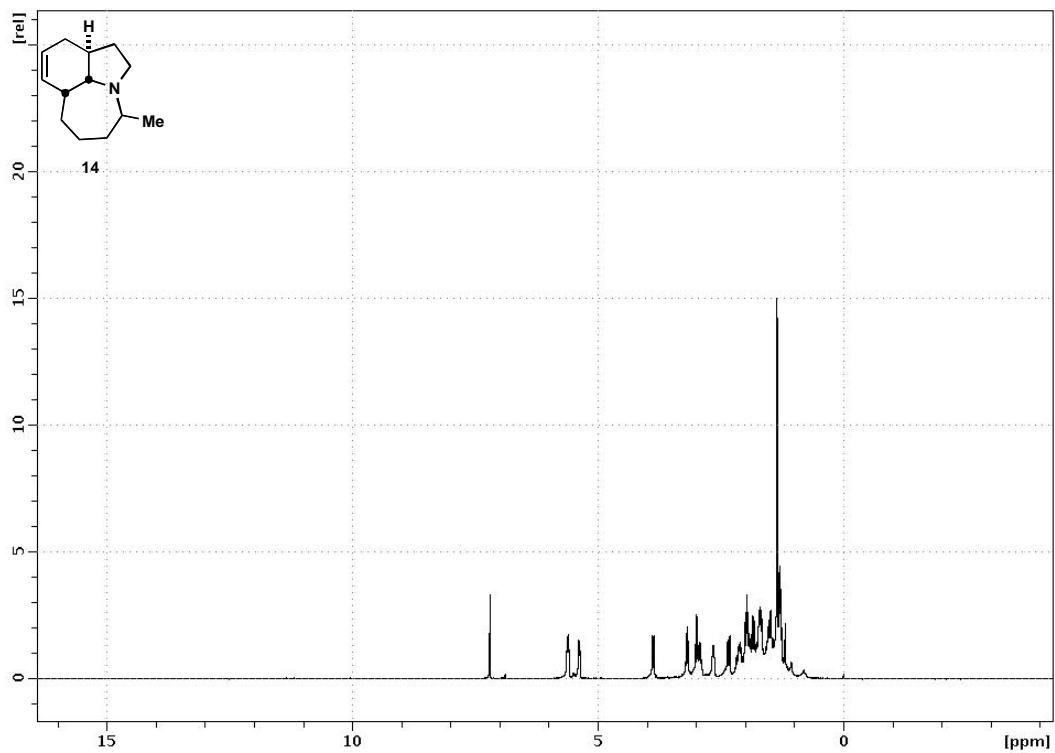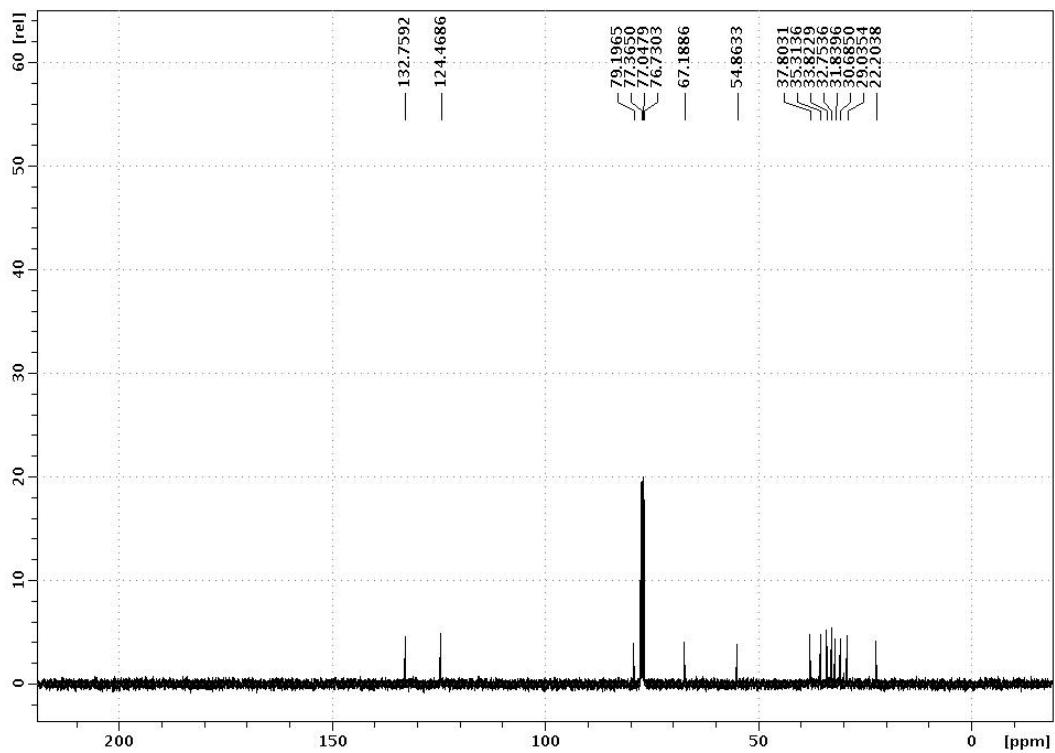

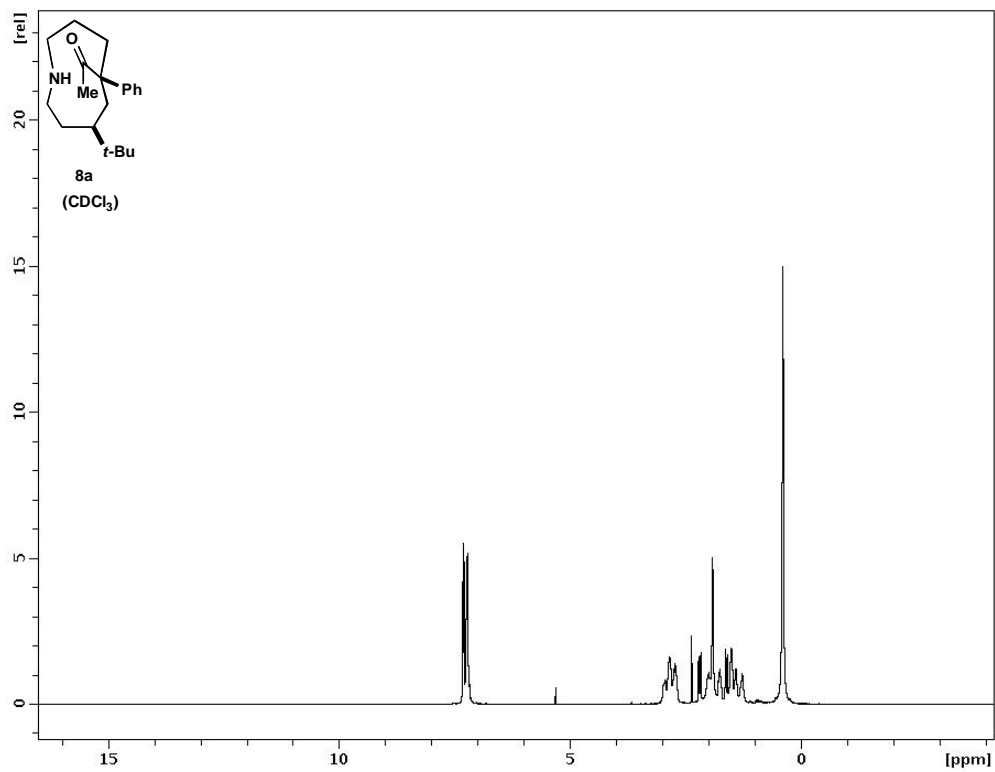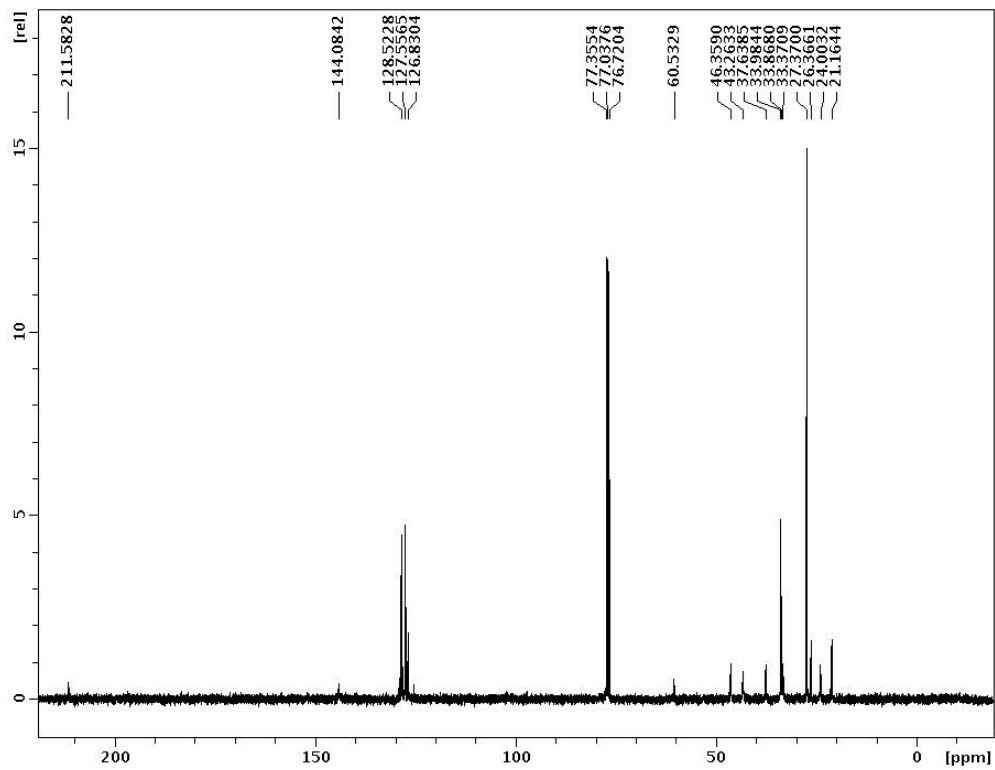

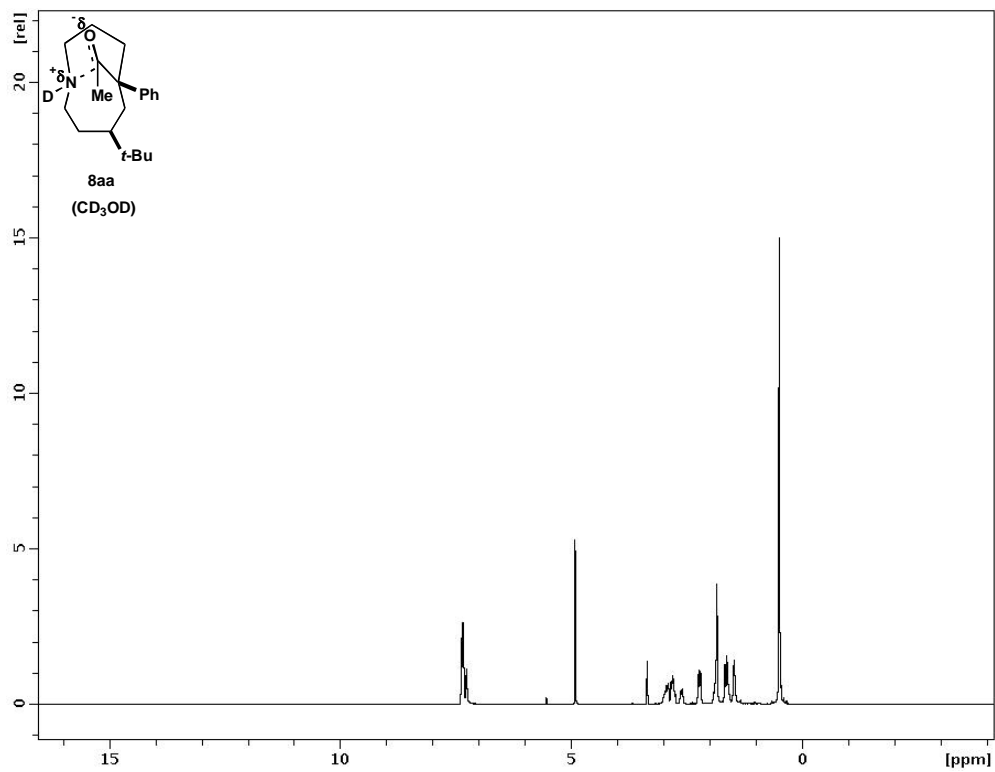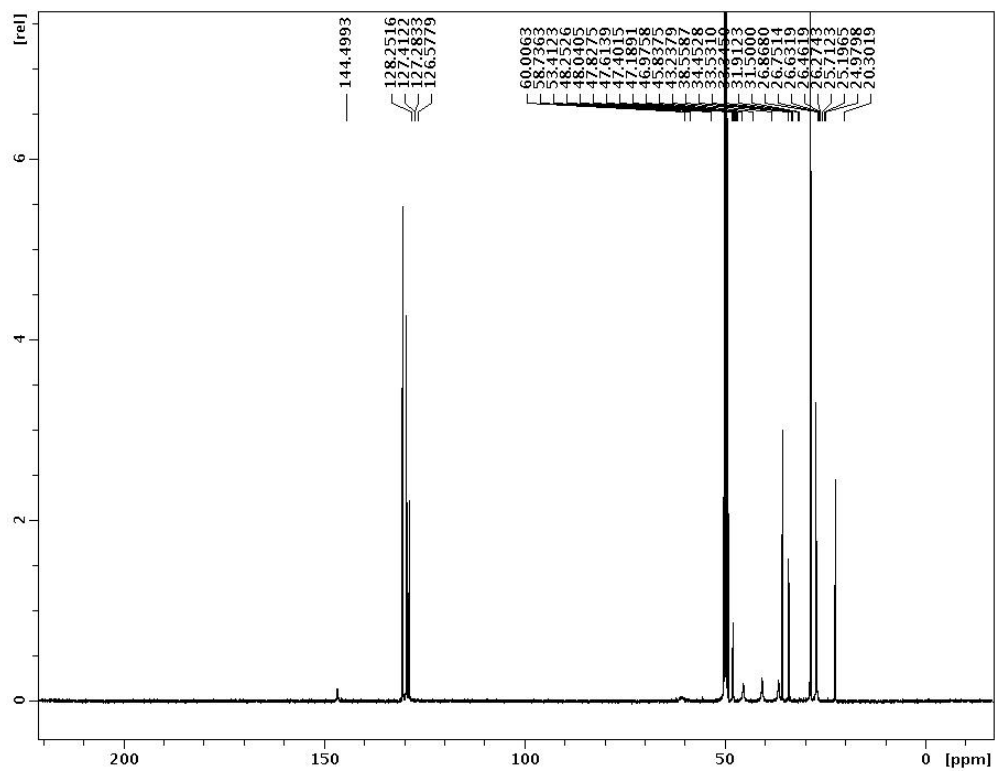



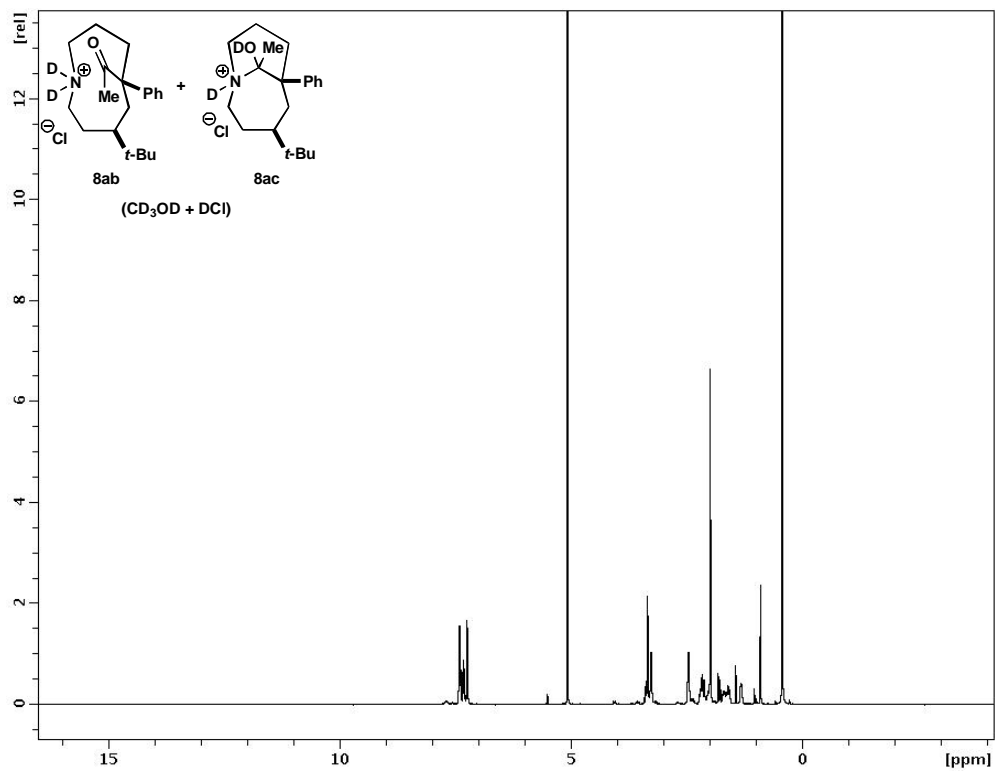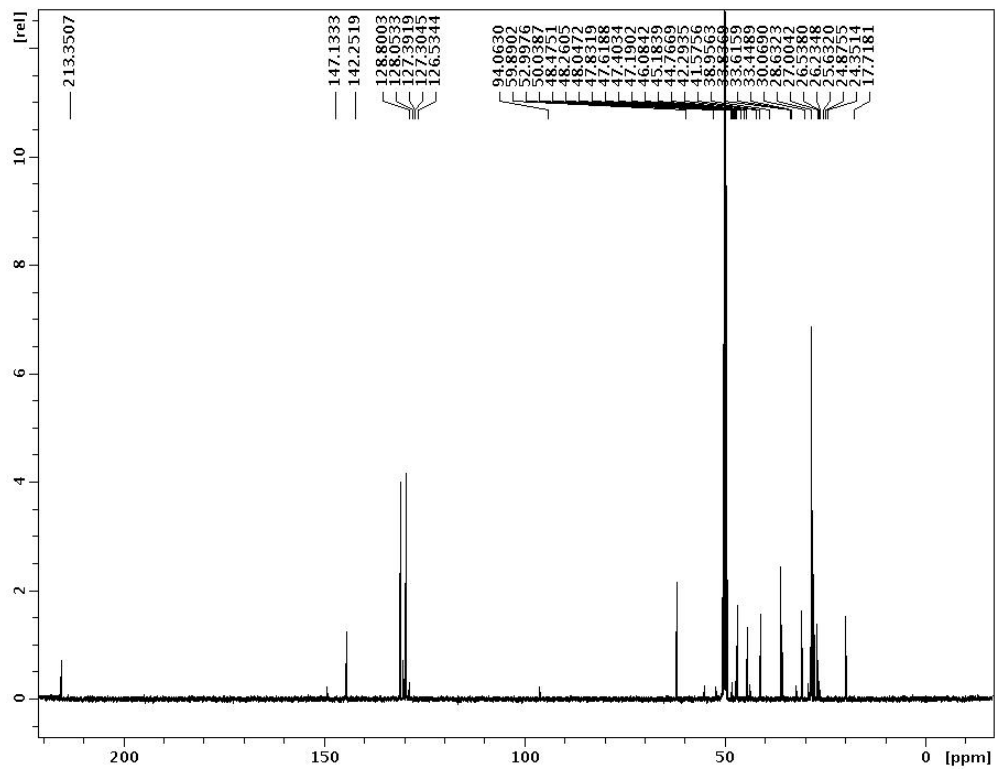

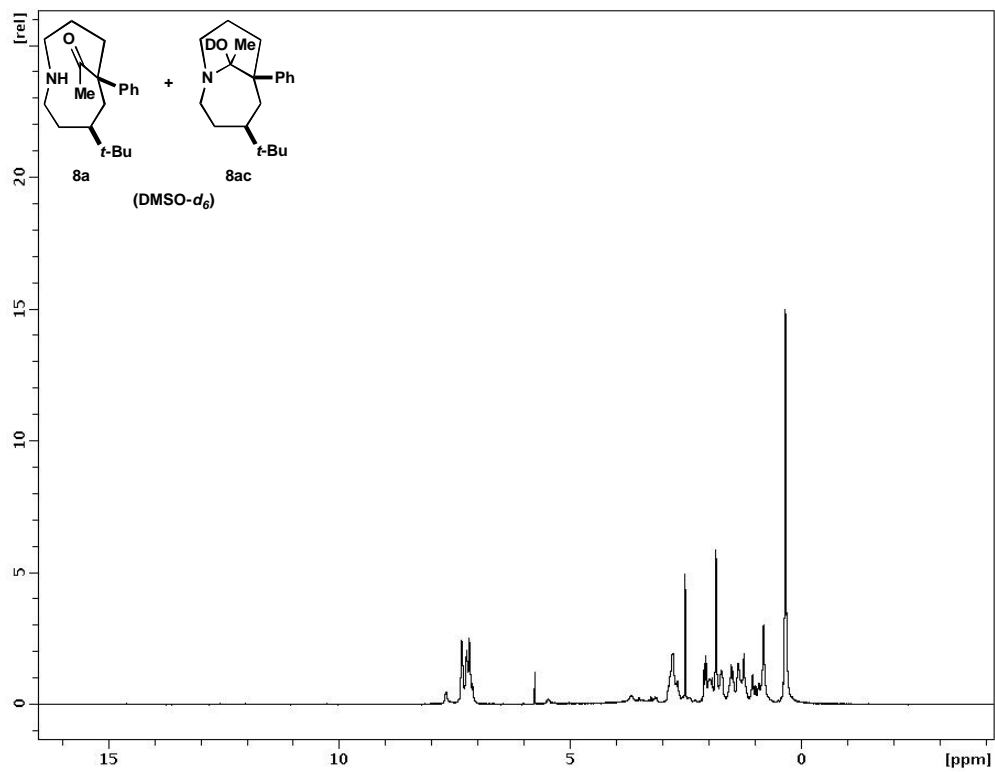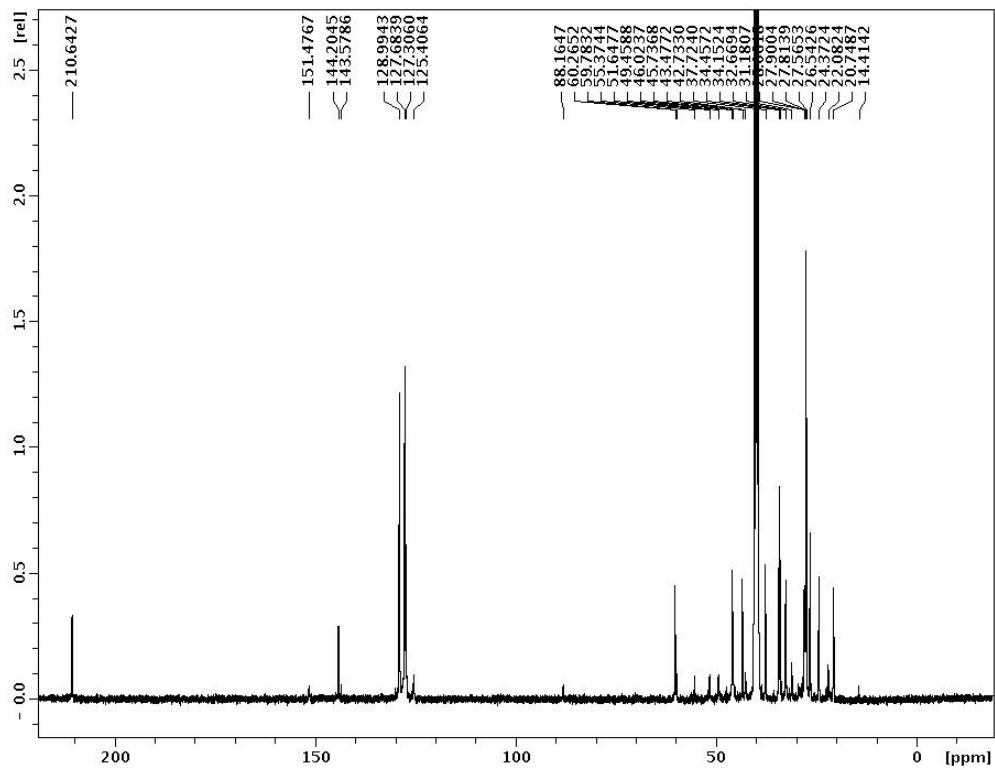

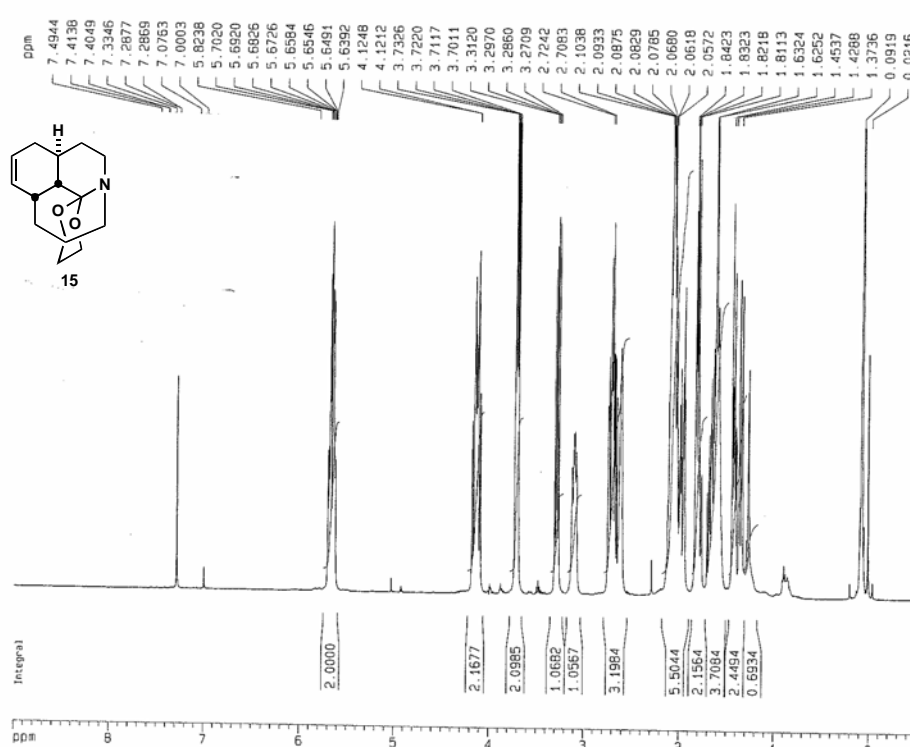

Current Data Parameters  
 NAME y1-11-P241  
 EXPNO 2  
 PROCNO 2

F2 - Acquisition Parameters  
 Date\_ 20030620  
 Time 17.09  
 INSTRUM spect  
 PROBHD 5 mm BBO BB-1H  
 PULPROG zg30  
 TD 32768  
 SOLVENT C0C13  
 NS 16  
 DS 2  
 SWH 6009.615 Hz  
 FIDRES 0.183399 Hz  
 AQ 2.7264309 sec  
 RG 114  
 DW 83.200 usec  
 DE 6.00 usec  
 TE 300.0 K  
 D1 0.0300000 sec

\*\*\*\*\* CHANNEL f1 \*\*\*\*\*  
 NUC1 1H  
 P1 7.70 usec  
 PL1 -4.00 dB  
 SFO1 500.1320005 MHz

F2 - Processing parameters  
 SI 32768  
 SF 500.1300000 MHz  
 KW EM  
 SSB 0  
 LB 0.30 Hz  
 GB 0  
 PC 1.00

F1 - Processing parameters  
 SI 1624  
 MC2 SF  
 SF 500.1300000 MHz  
 KW DSINE  
 SSB 0  
 LB 0.30 Hz  
 GB 0

1D NMR plot parameters  
 CX 20.00 cm  
 CY 0.00 cm  
 F1P 9.000 ppm  
 F1 4501.17 Hz  
 F2P -0.500 ppm  
 F2 -250.07 Hz  
 PPMCM 0.47500 ppm/cm  
 HZCM 237.56175 Hz/cm

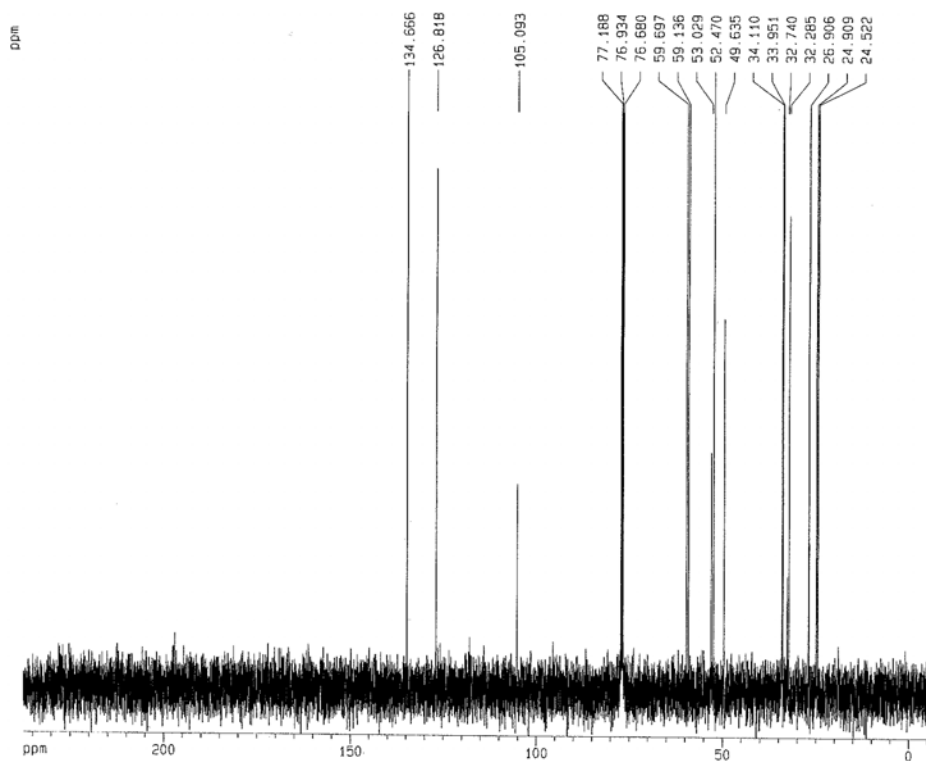

Current Data Parameters  
 NAME y1-11-P241  
 EXPNO 2  
 PROCNO 2

F2 - Acquisition Parameters  
 Date\_ 20030620  
 Time 17.12  
 INSTRUM spect  
 PROBHD 5 mm BBO BB-1H  
 PULPROG zgpg30  
 TD 65536  
 SOLVENT C0C13  
 NS 146  
 DS 4  
 SWH 31445.541 Hz  
 FIDRES 0.472826 Hz  
 AQ 1.0420583 sec  
 RG 2048  
 DW 19.900 usec  
 DE 6.00 usec  
 TE 300.0 K  
 D1 0.1000000 sec  
 S11 0.0300000 sec  
 S12 0.0000000 sec

\*\*\*\*\* CHANNEL f1 \*\*\*\*\*  
 NUC1 13C  
 P1 6.50 usec  
 PL1 5.00 dB  
 SFO1 125.7719472 MHz

\*\*\*\*\* CHANNEL f2 \*\*\*\*\*  
 CPDPRG2 waltz16  
 MC2 SF  
 PCPD2 95.00 usec  
 PL2 -4.00 dB  
 PL12 15.00 dB  
 PL13 30.00 dB  
 SFO2 500.1325000 MHz

F2 - Processing parameters  
 SI 65536  
 SF 125.7578008 MHz  
 KW EM  
 SSB 0  
 LB 1.00 Hz  
 GB 0  
 PC 1.40

F1 - Processing parameters  
 SI 1604  
 MC2 SF  
 SF 500.1300000 MHz  
 KW no  
 SSB 0  
 LB 0.30 Hz  
 GB 0

1D NMR plot parameters  
 CX 20.00 cm  
 CY 0.00 cm  
 F1P 242.517 ppm  
 F1 30498.43 Hz  
 F2P -7.539 ppm  
 F2 -948.11 Hz  
 PPMCM 12.50282 ppm/cm  
 HZCM 1572.32703 Hz/cm

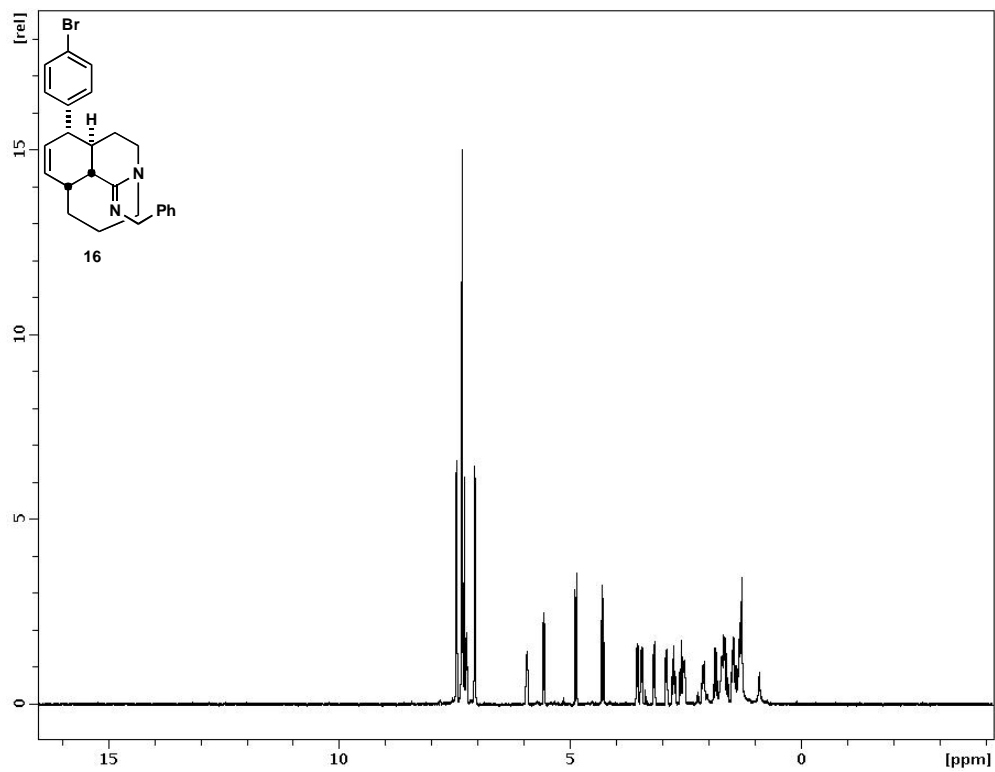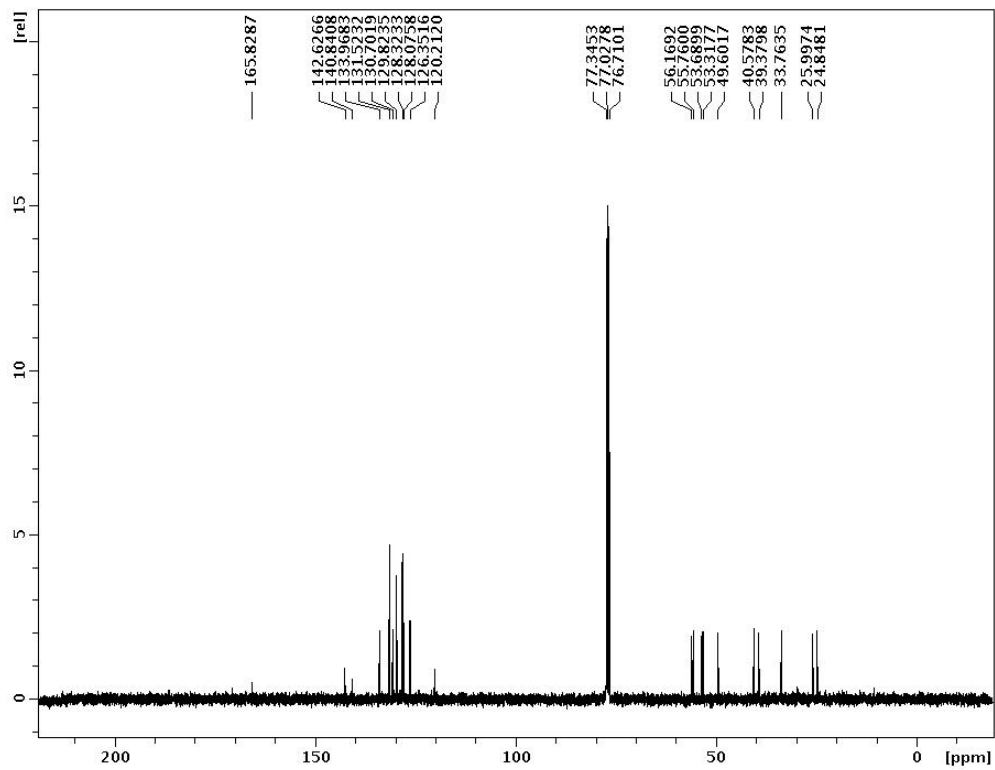

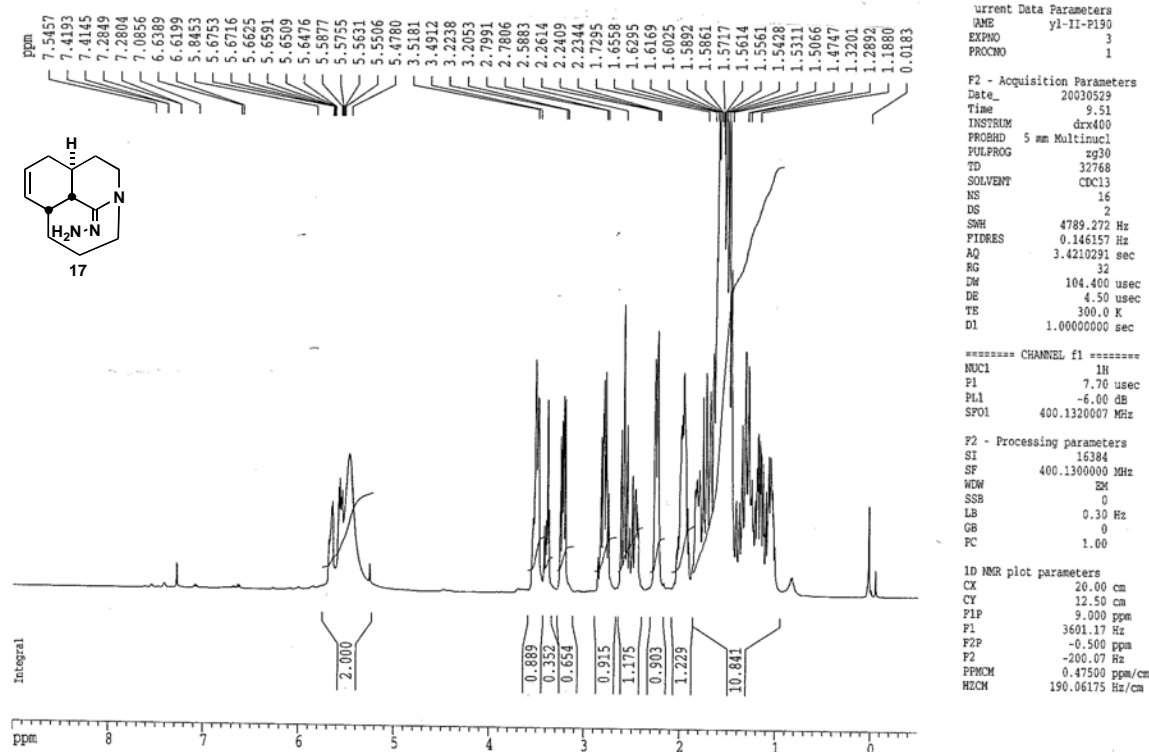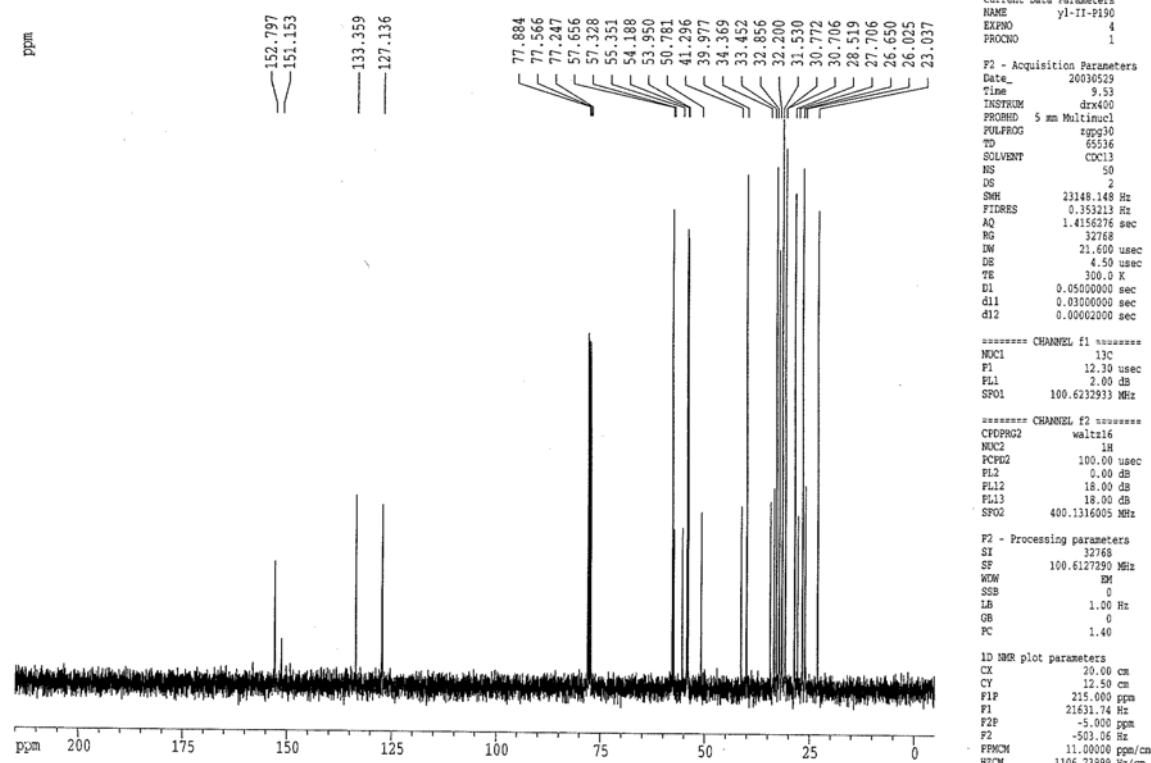

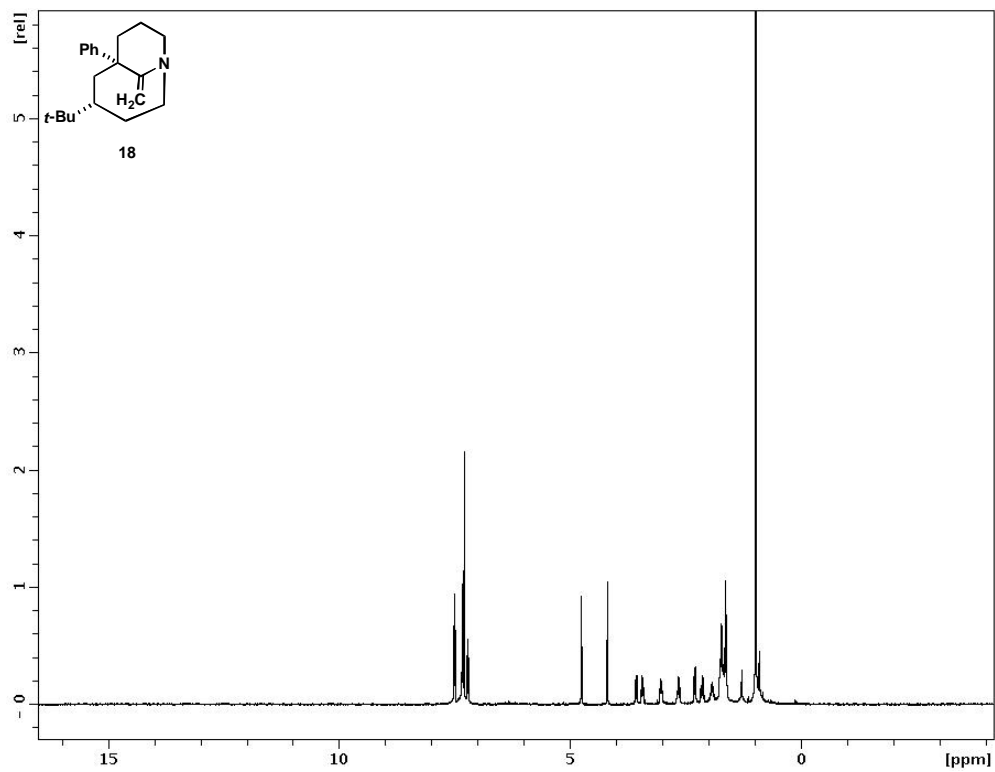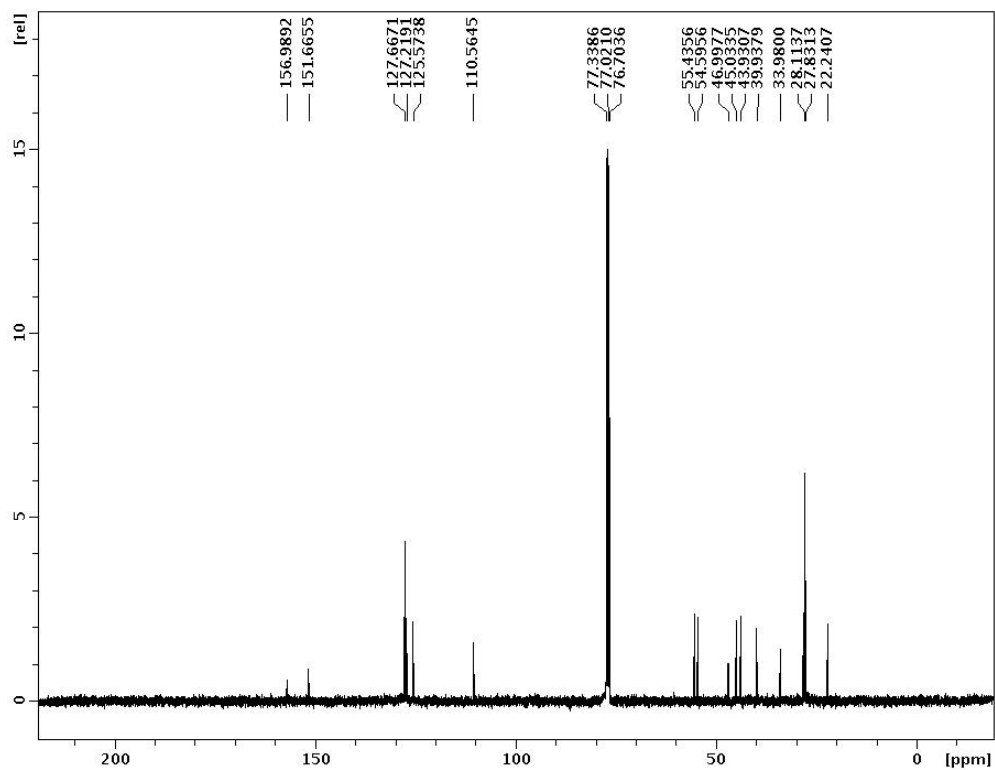

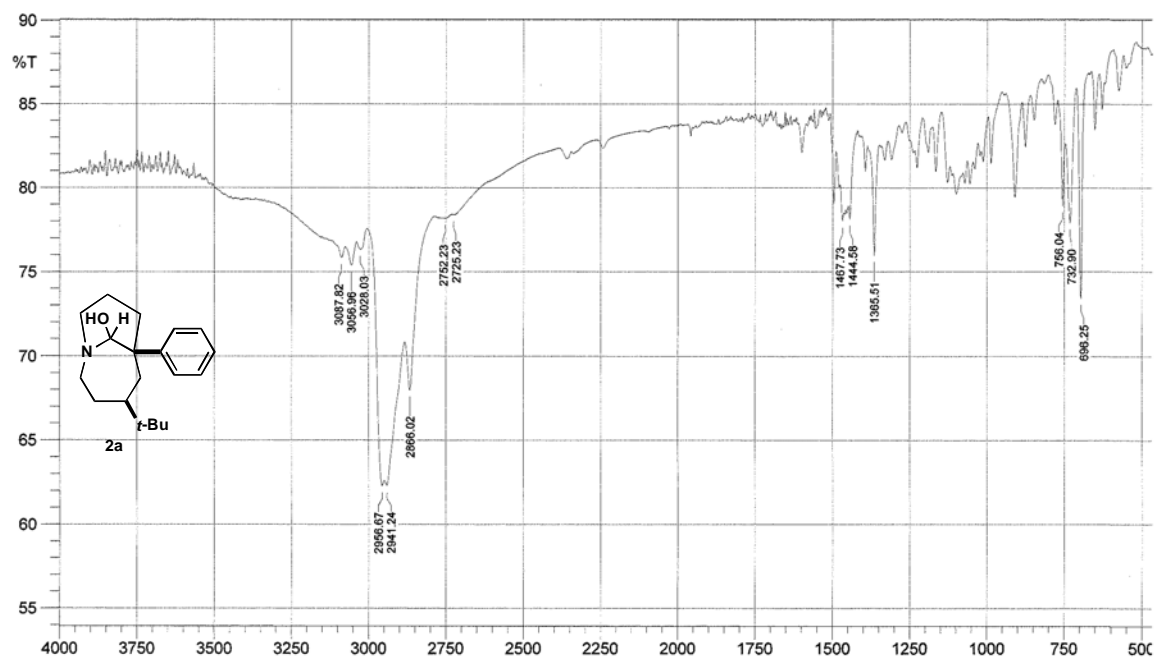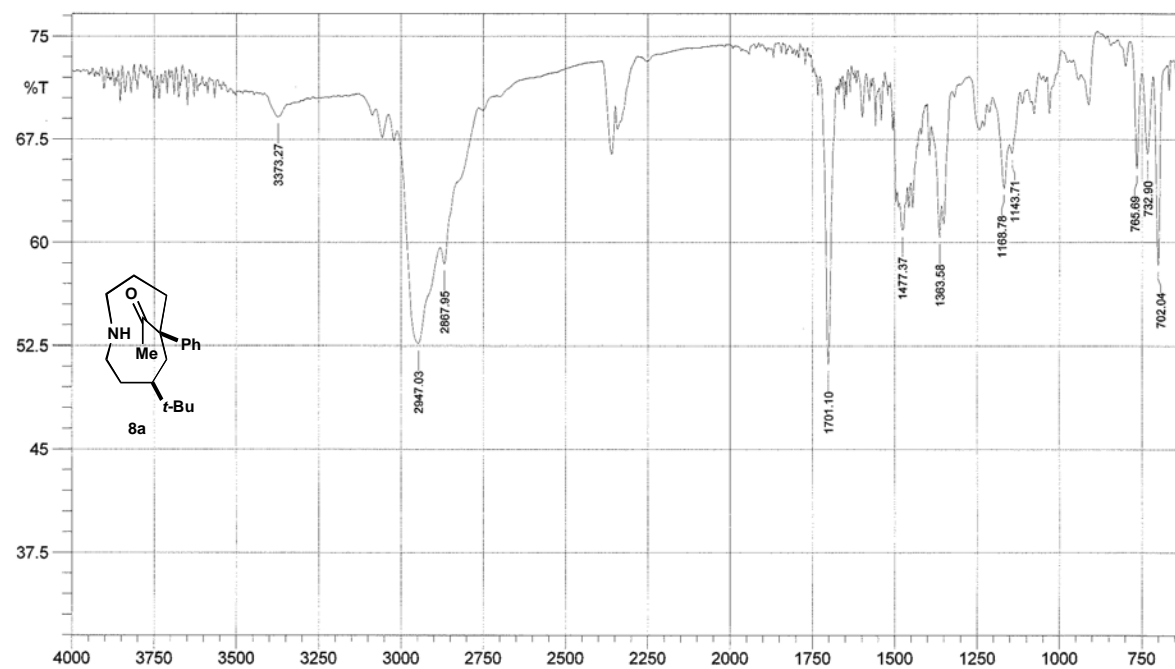

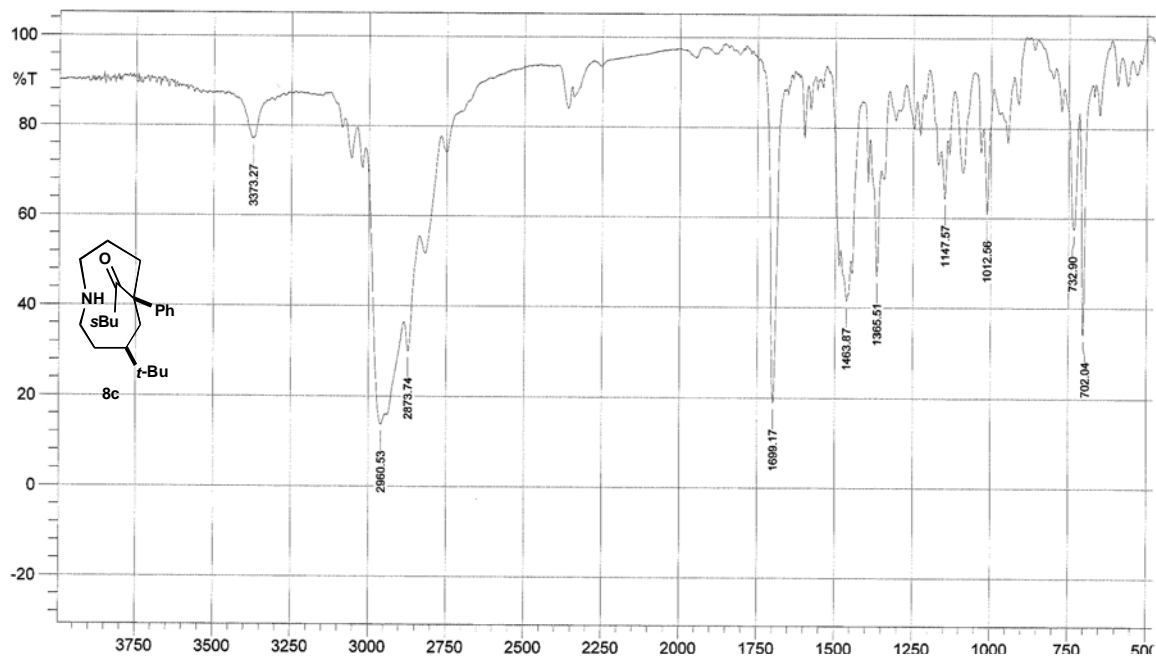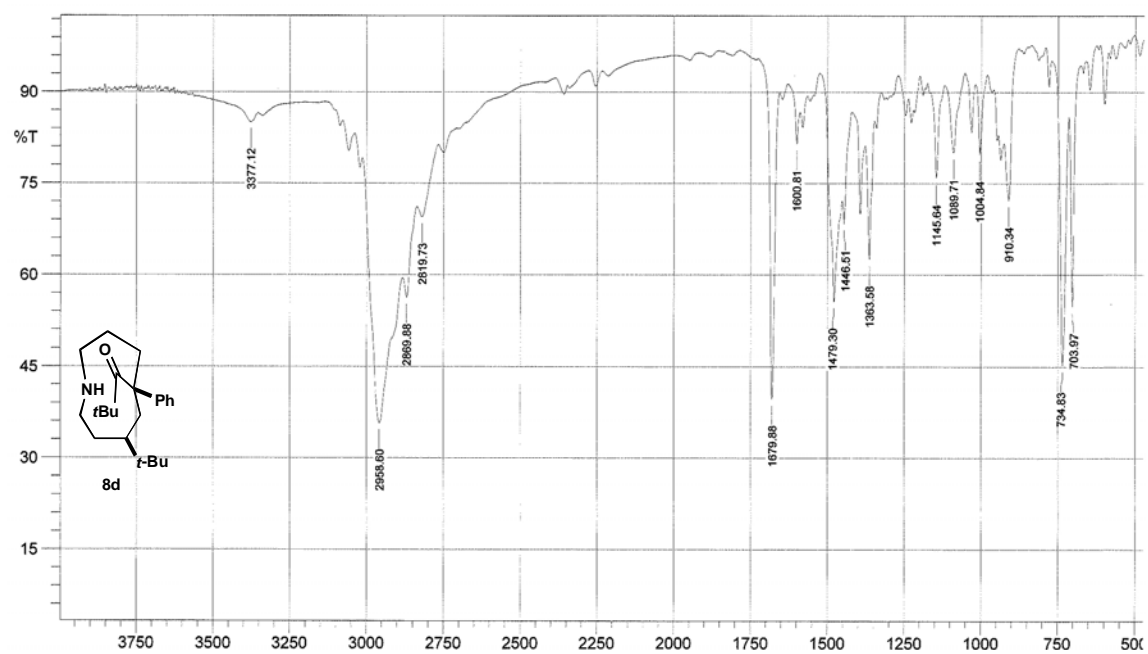



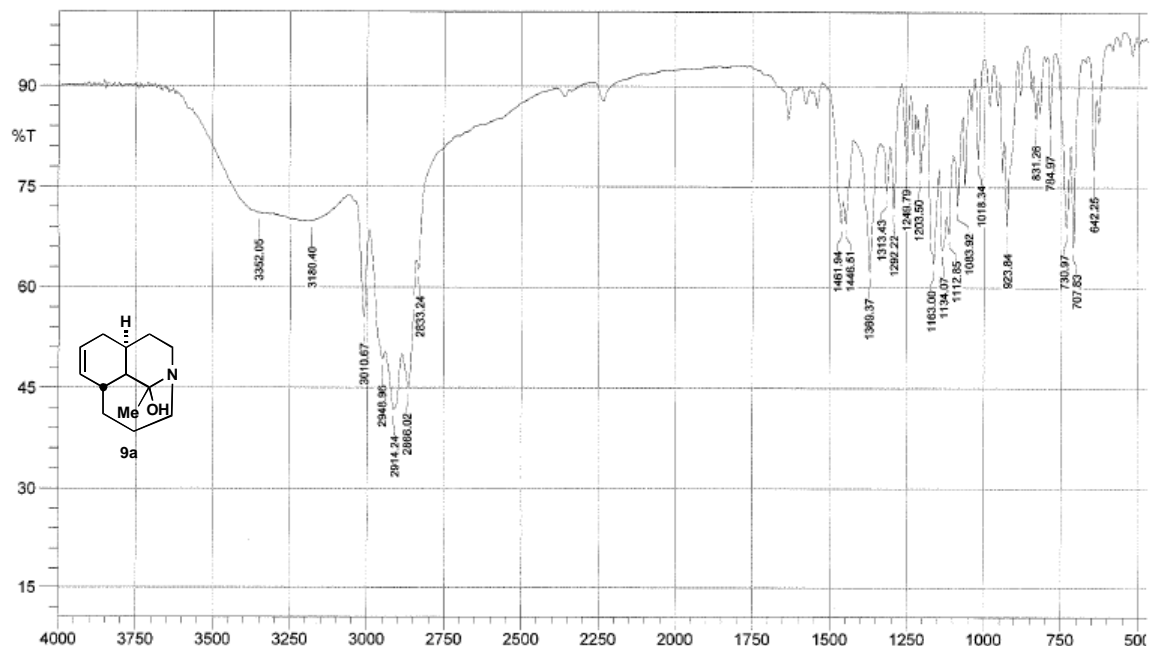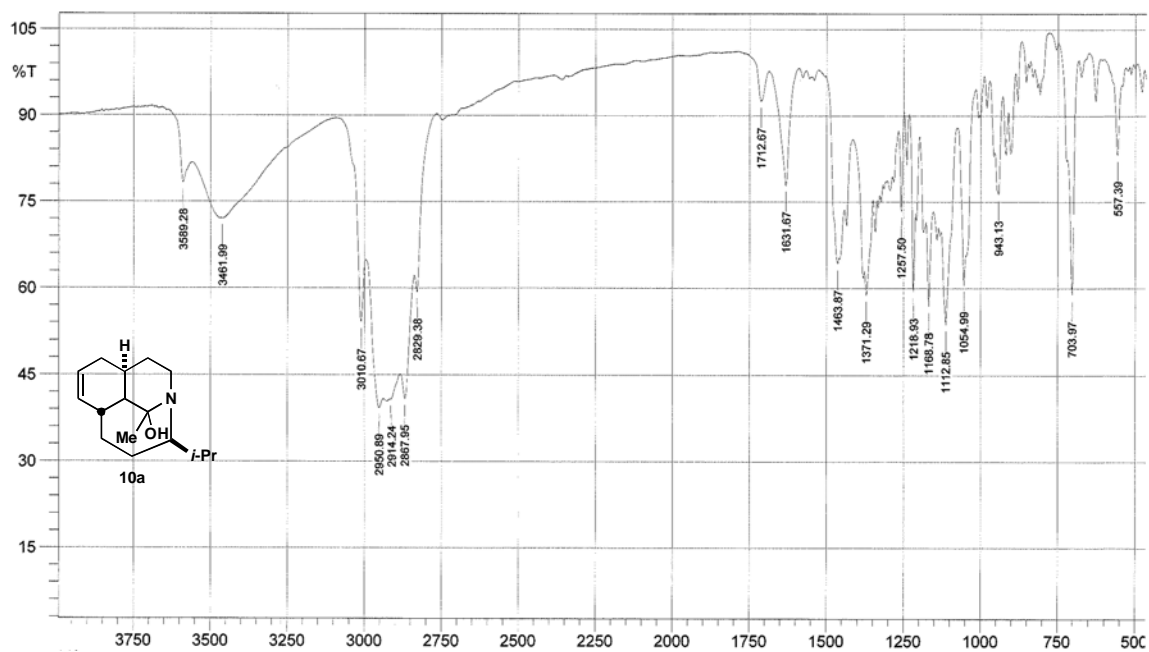

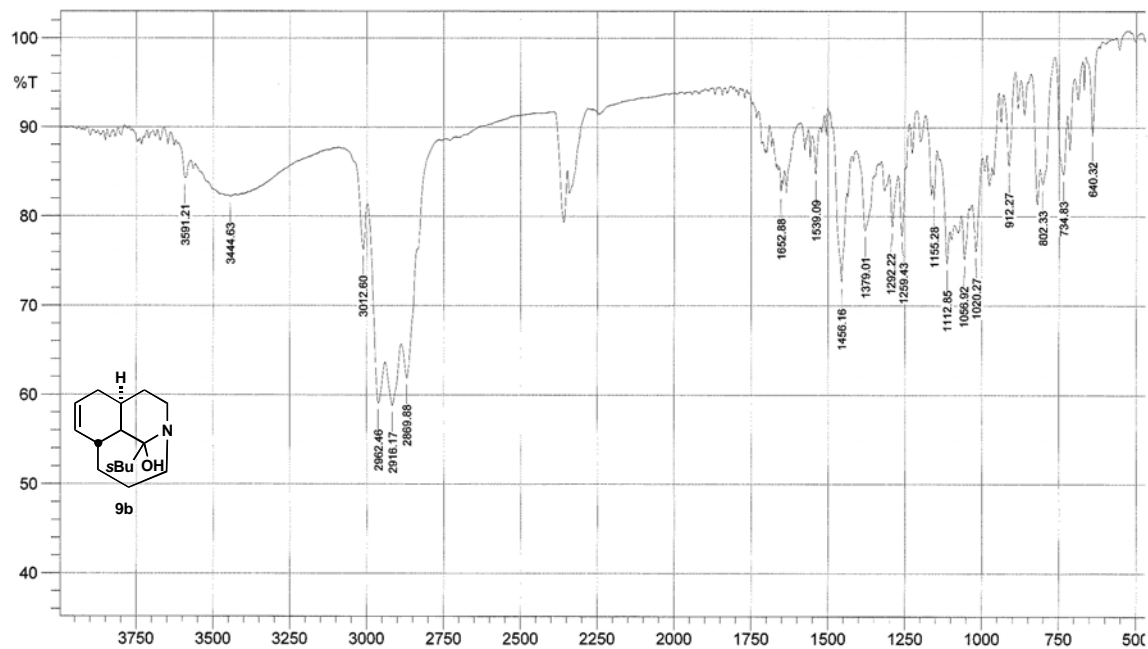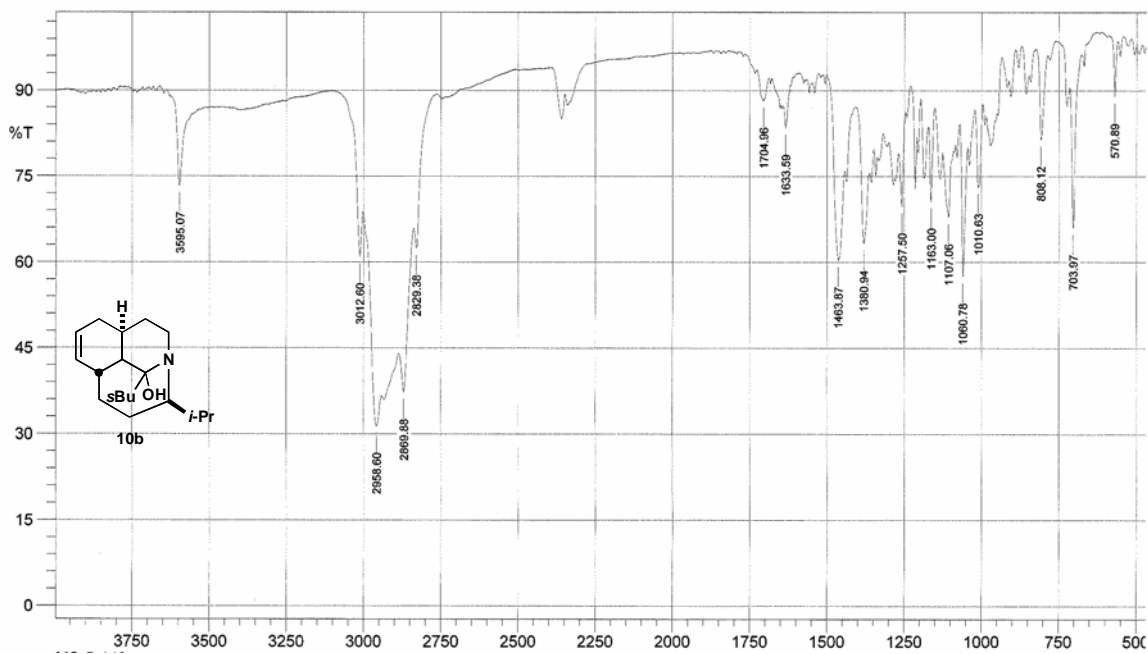

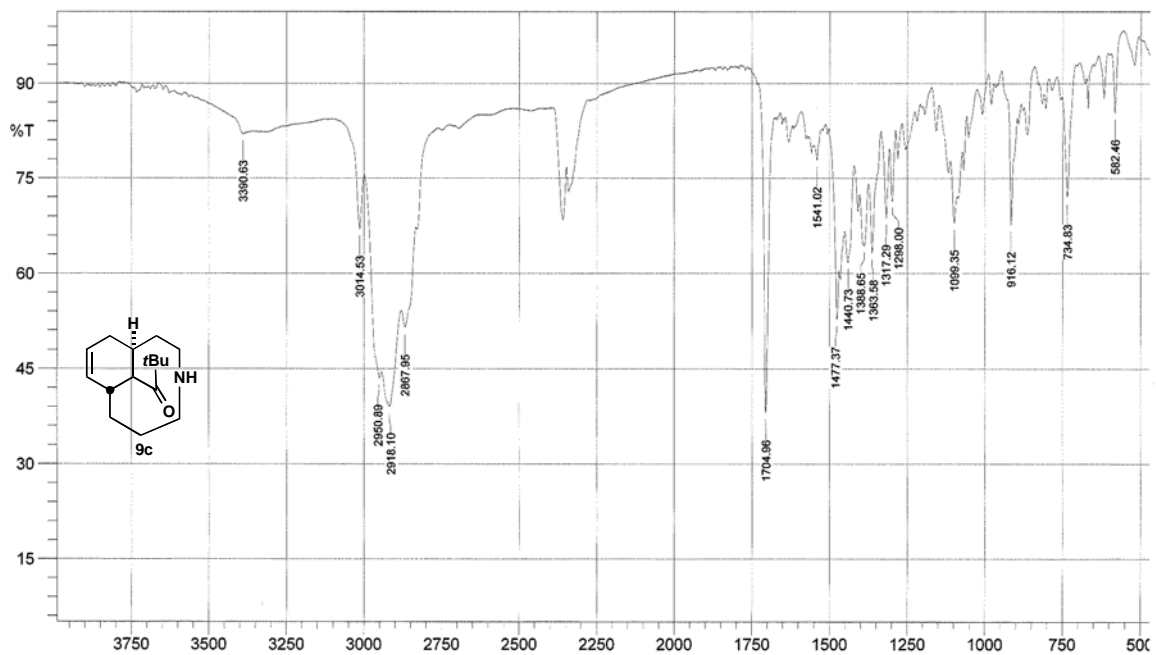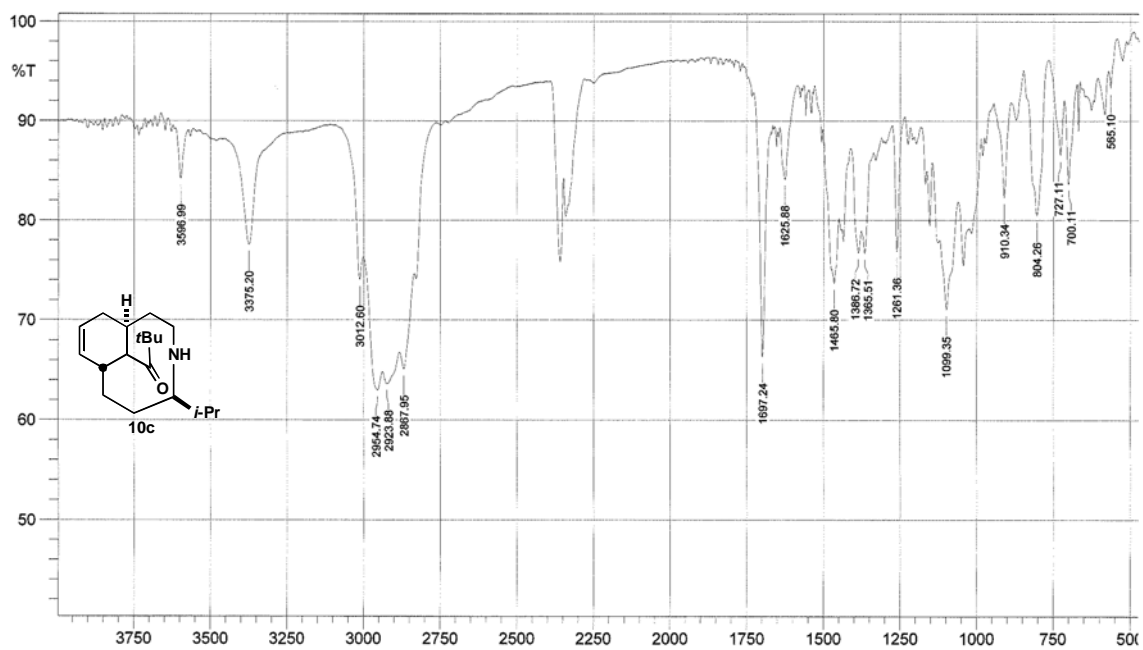

Supplement: NIHMS173194-supplement-1_si_001.pdf [file NIHMS173194-supplement-1_si_001.pdf]
